# Supplementary material
Source: PubMed Central journal article supplement (PMC8192451)

# bip\_pgc3.6.chr3

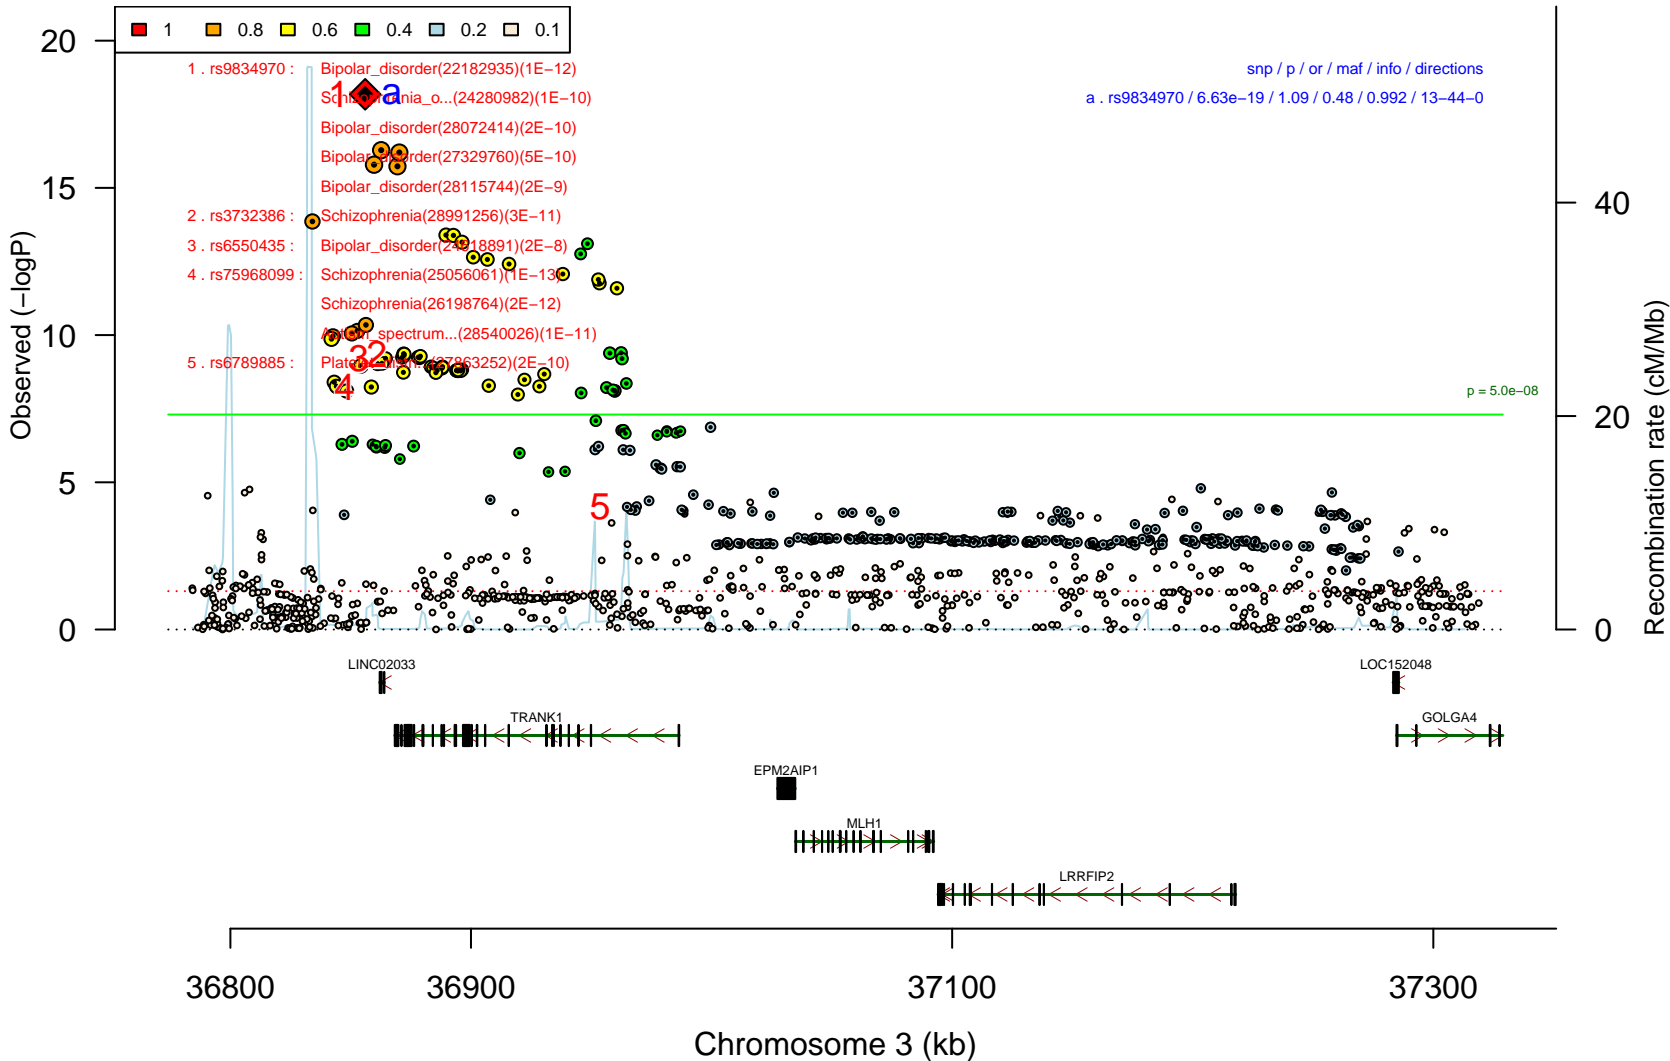

# bip\_pgc3.17.chr6

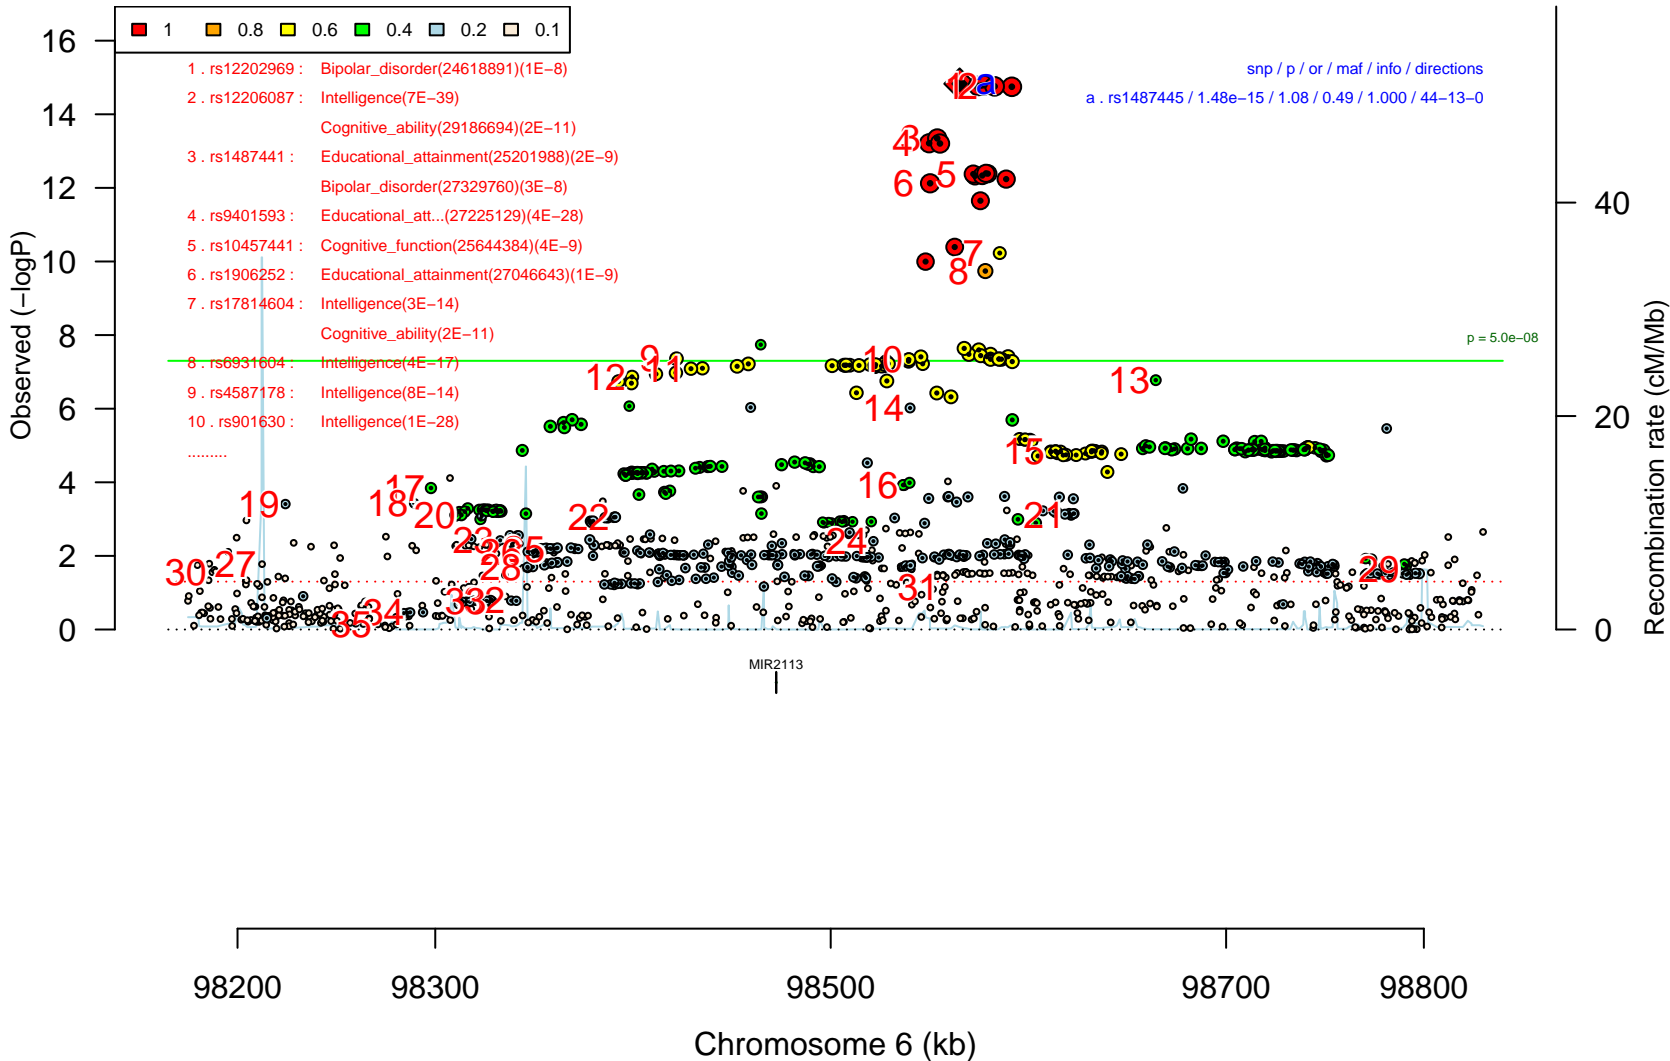

# bip\_pgc3.41.chr12

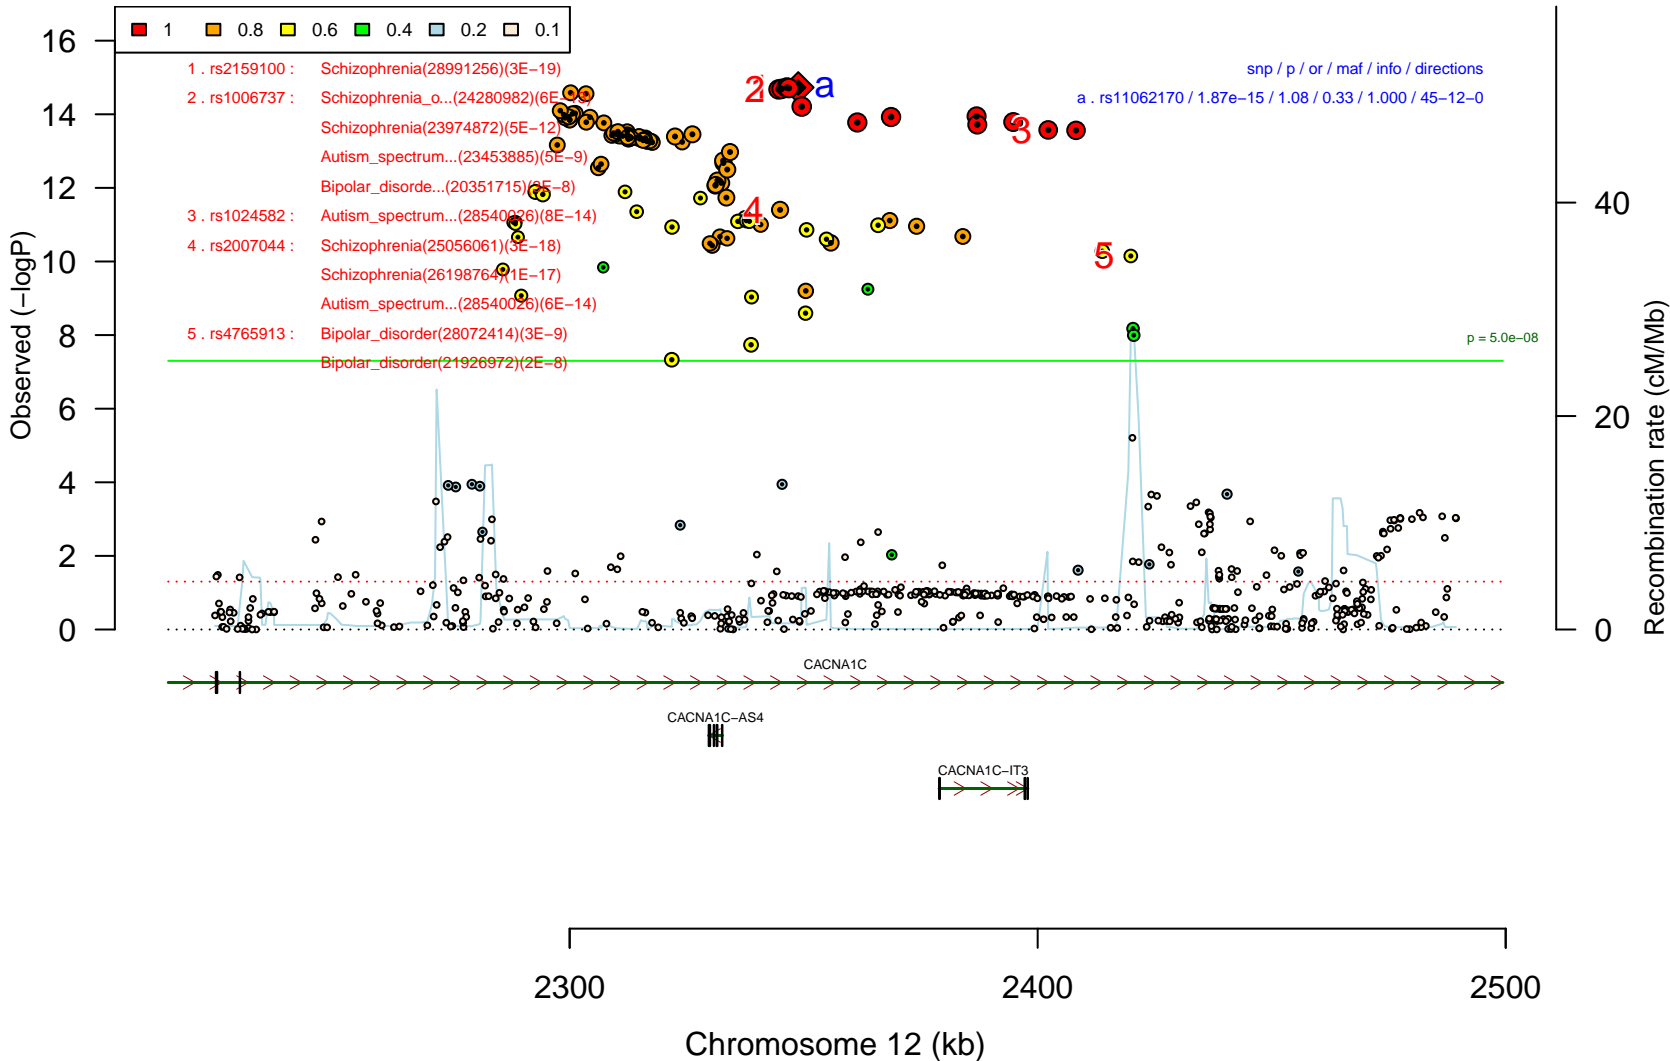



# bip\_pgc3.36.chr11

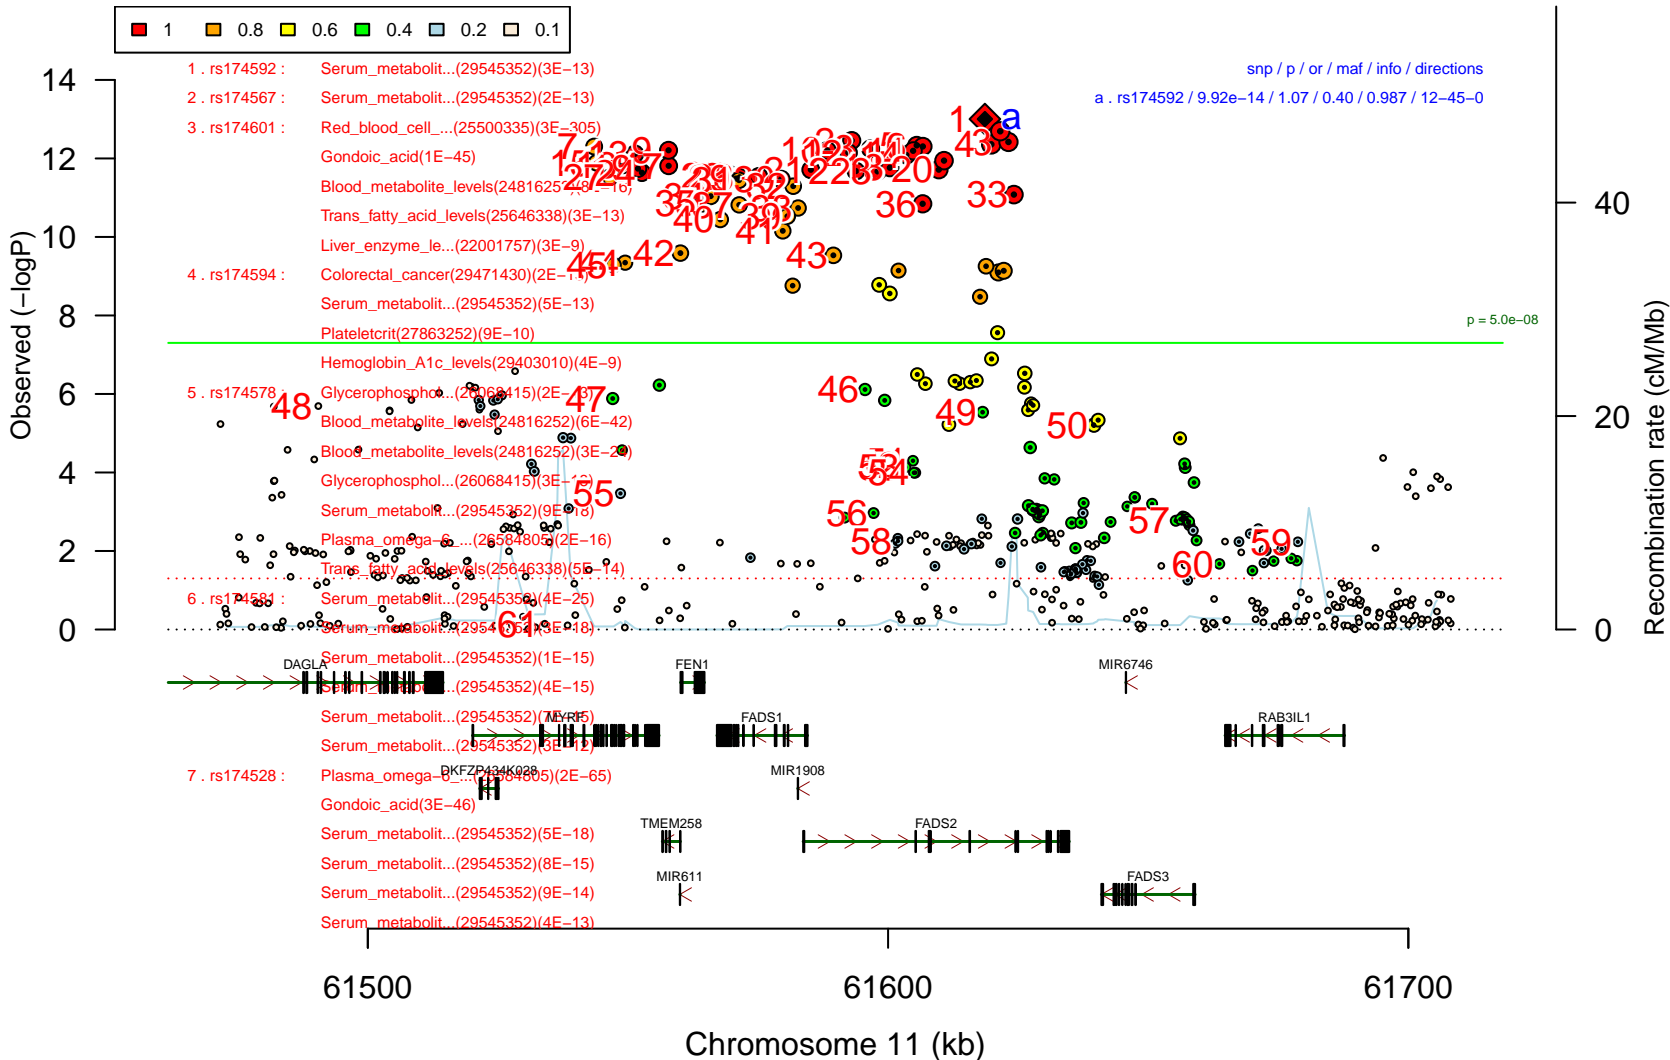

# bip\_pgc3.21.chr7

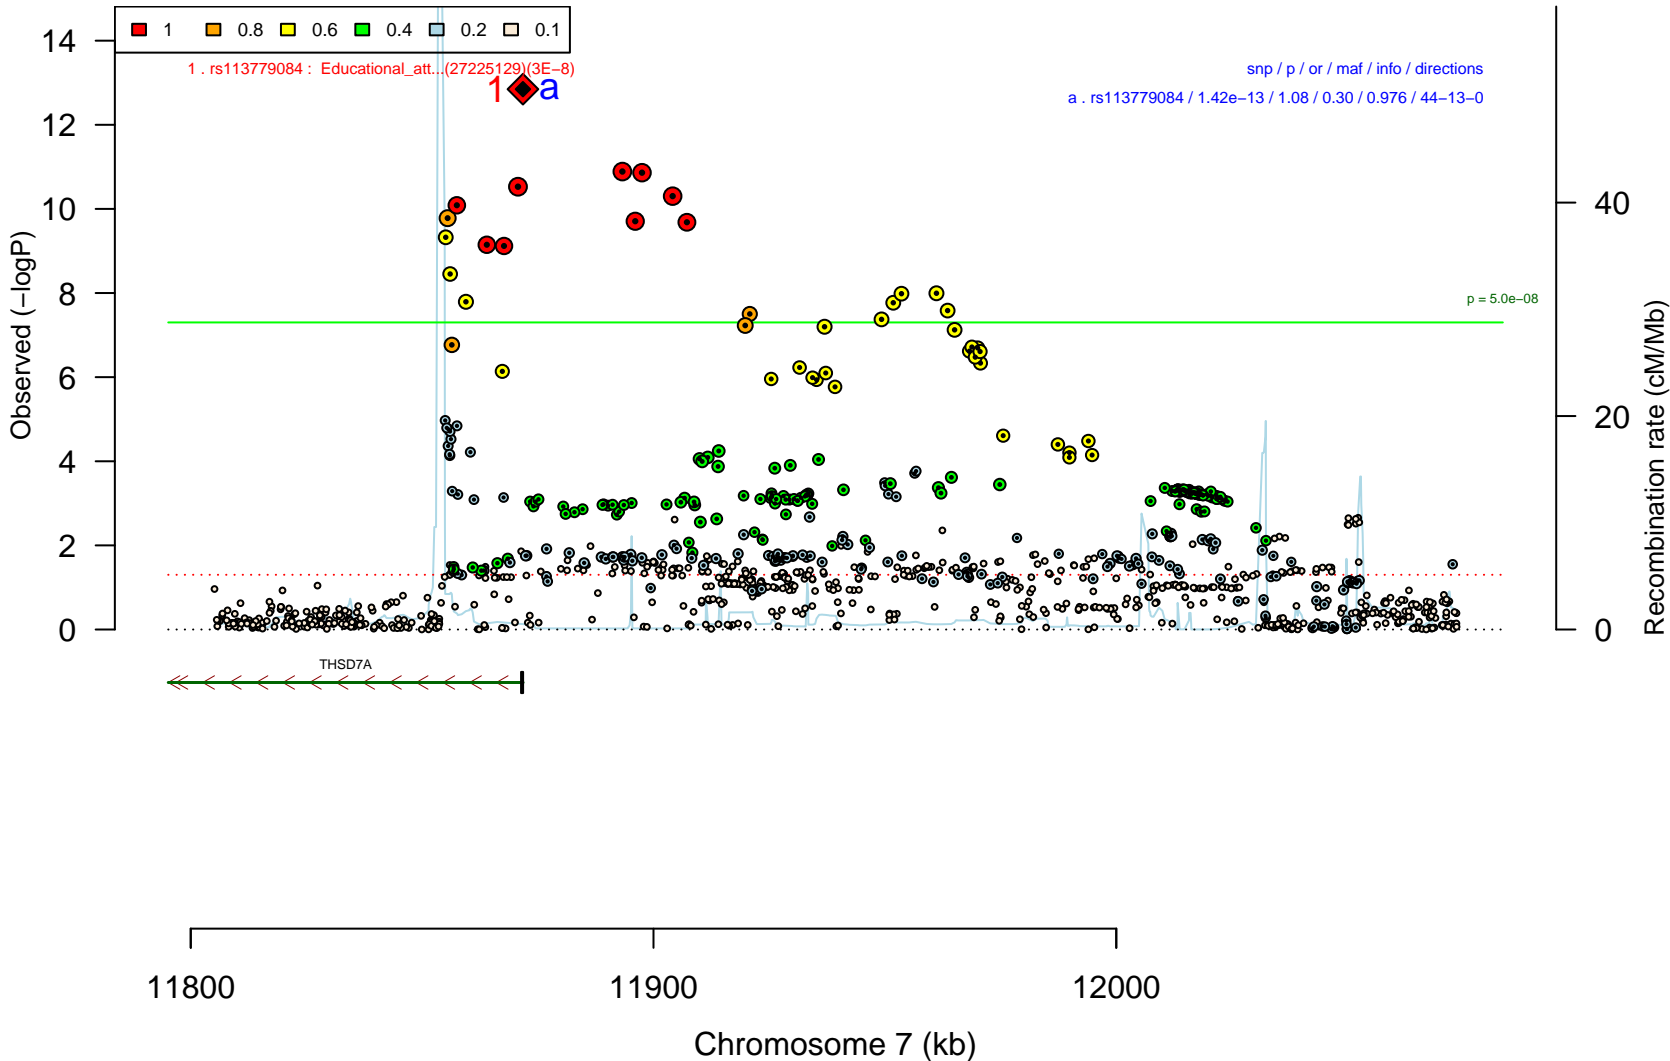

# bip\_pgc3.7.chr3

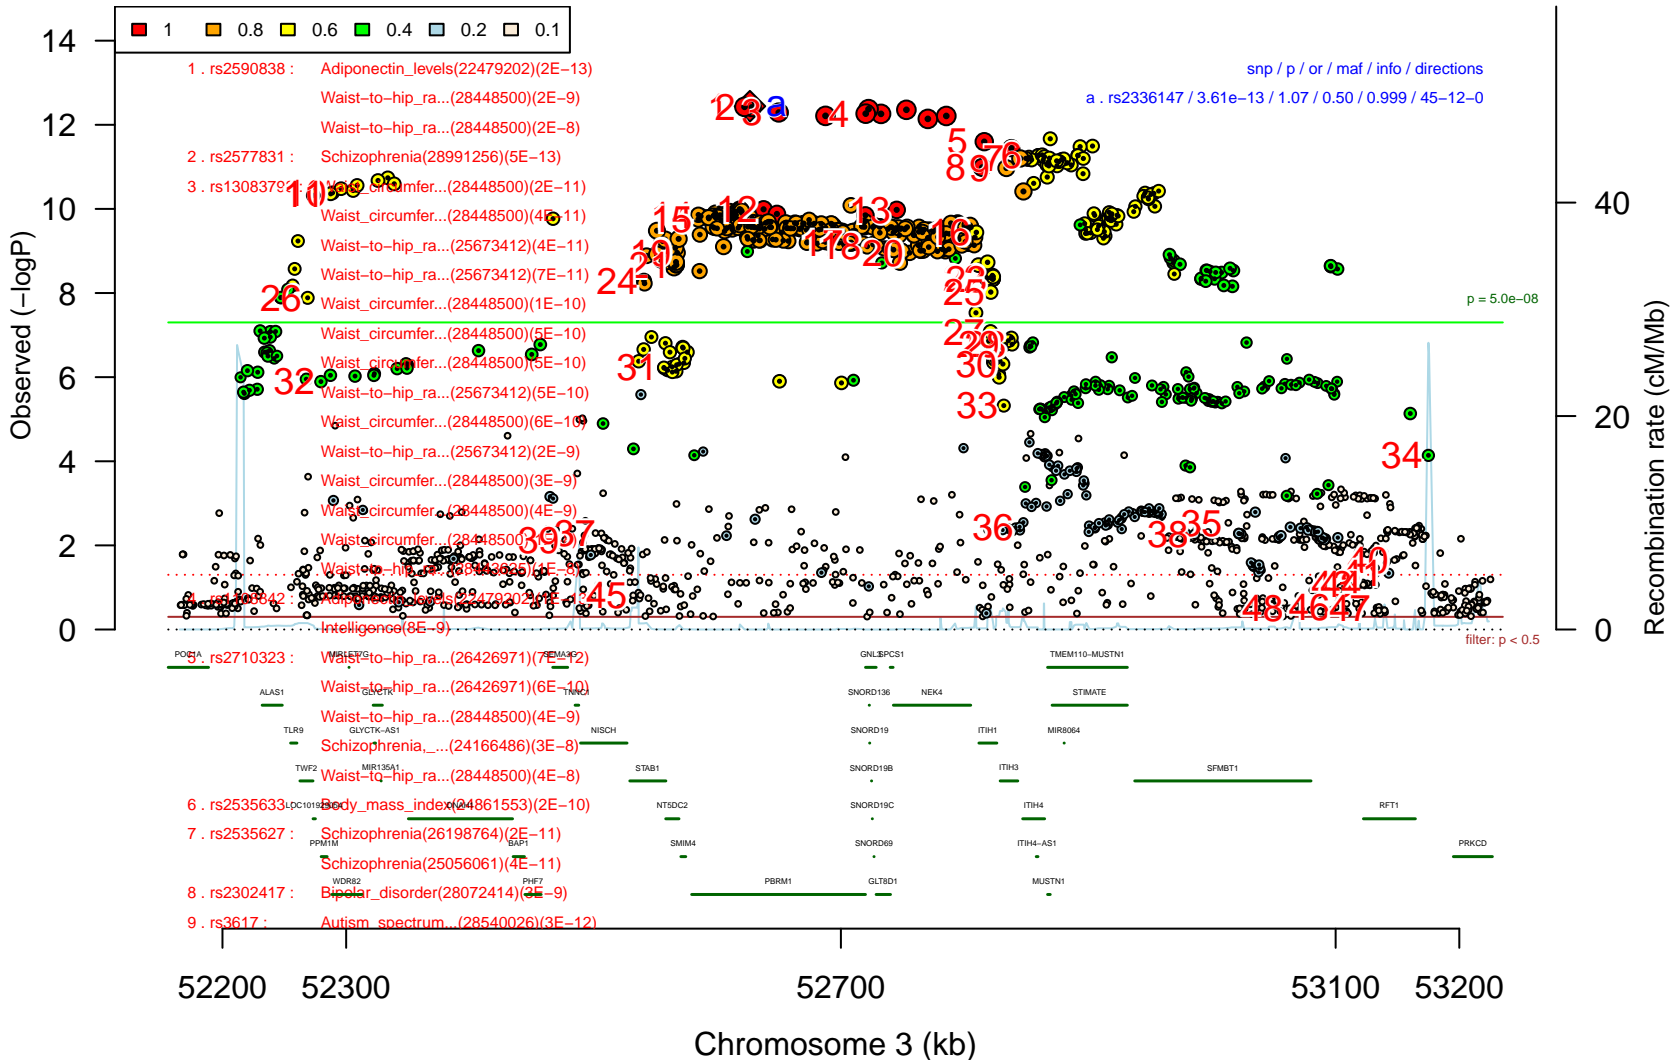

# bip\_pgc3.33.chr10

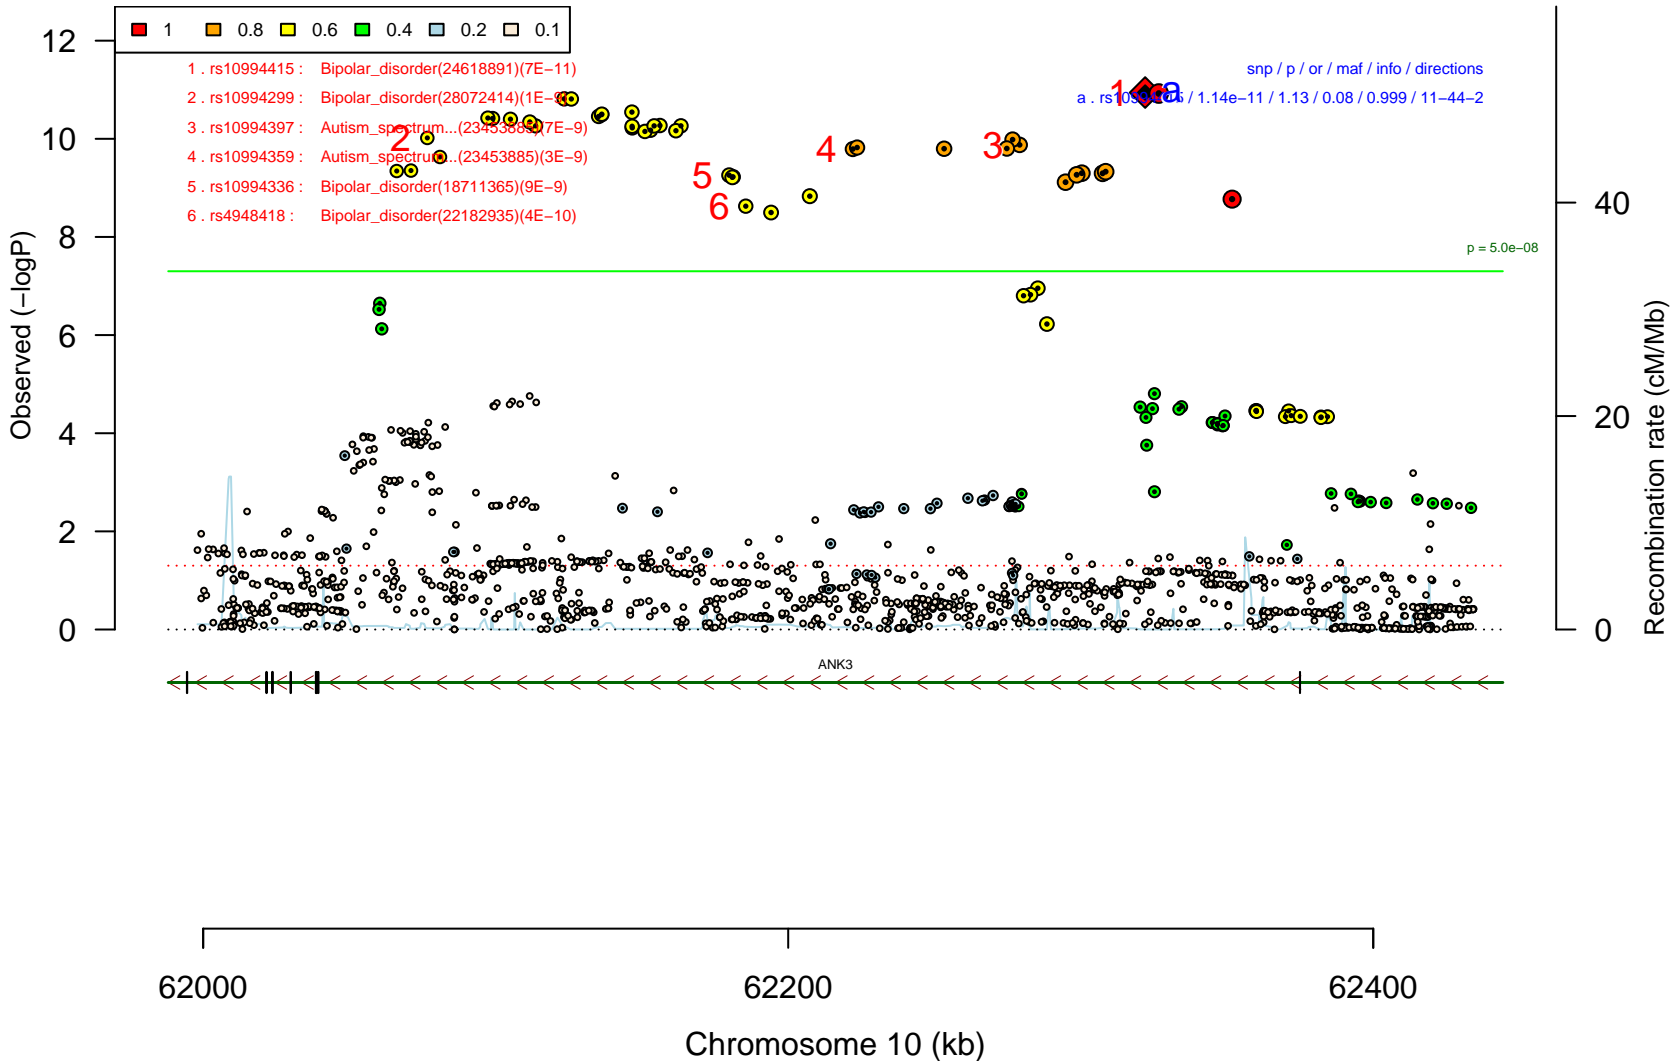



# bip\_pgc3.35.chr10

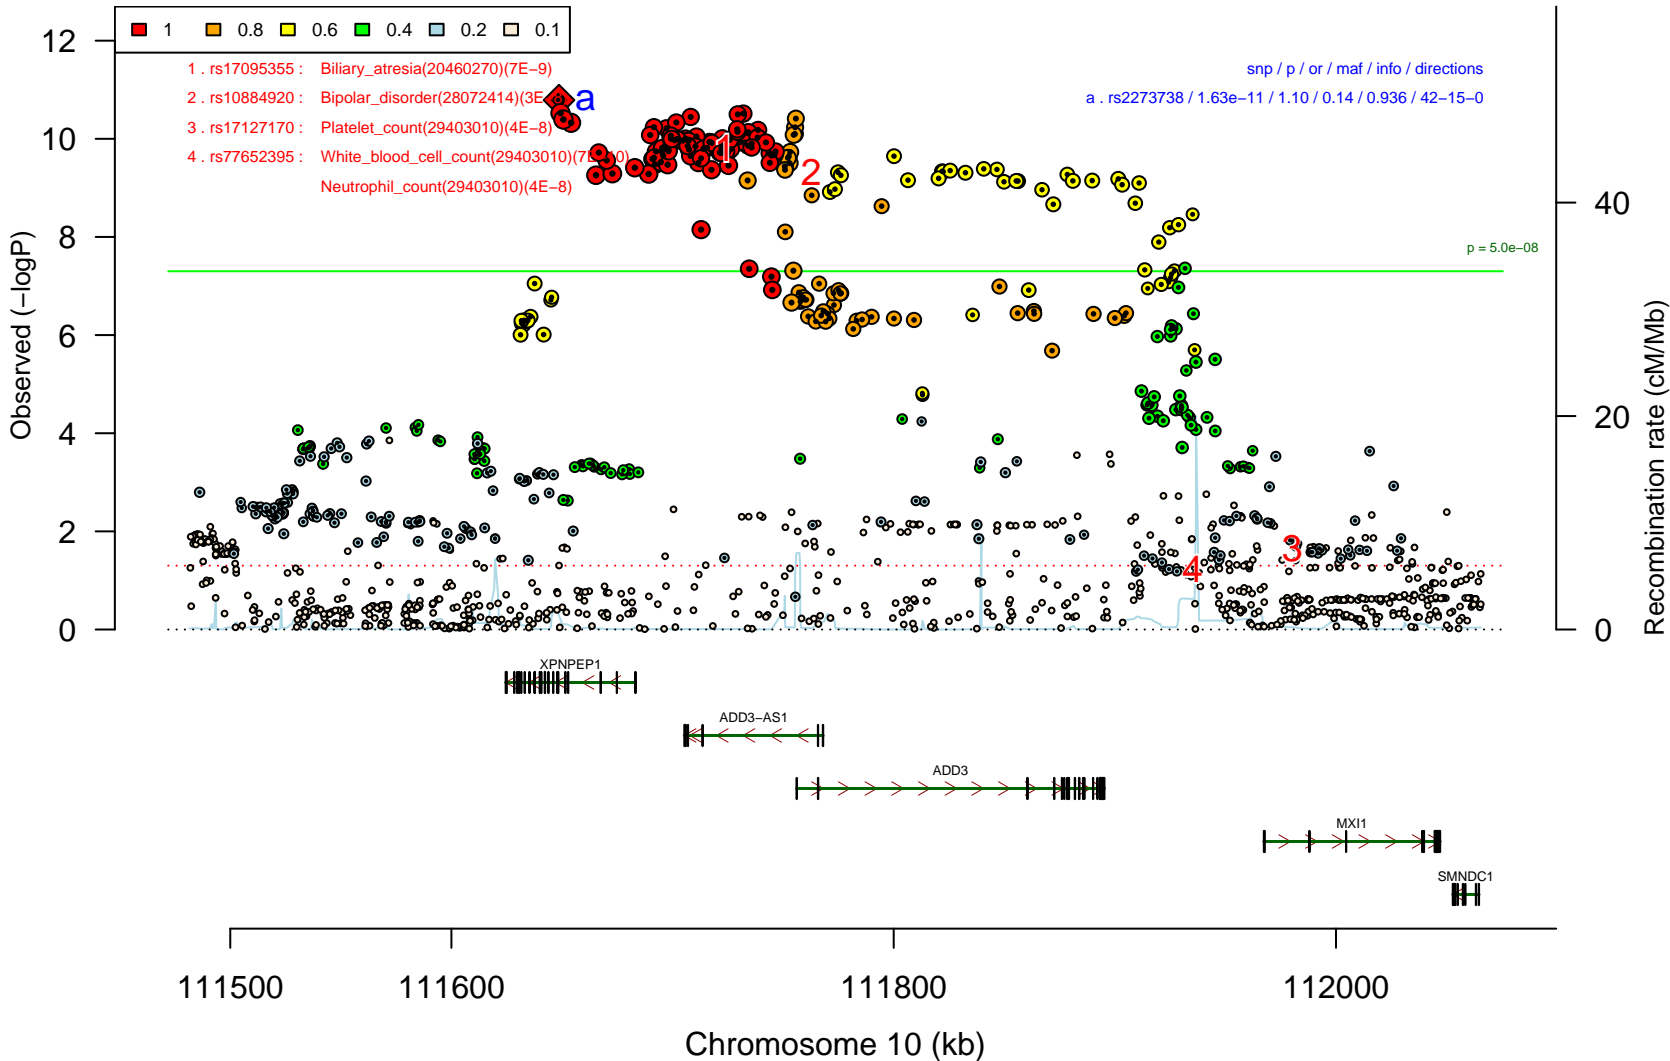

# bip\_pgc3.27.chr8

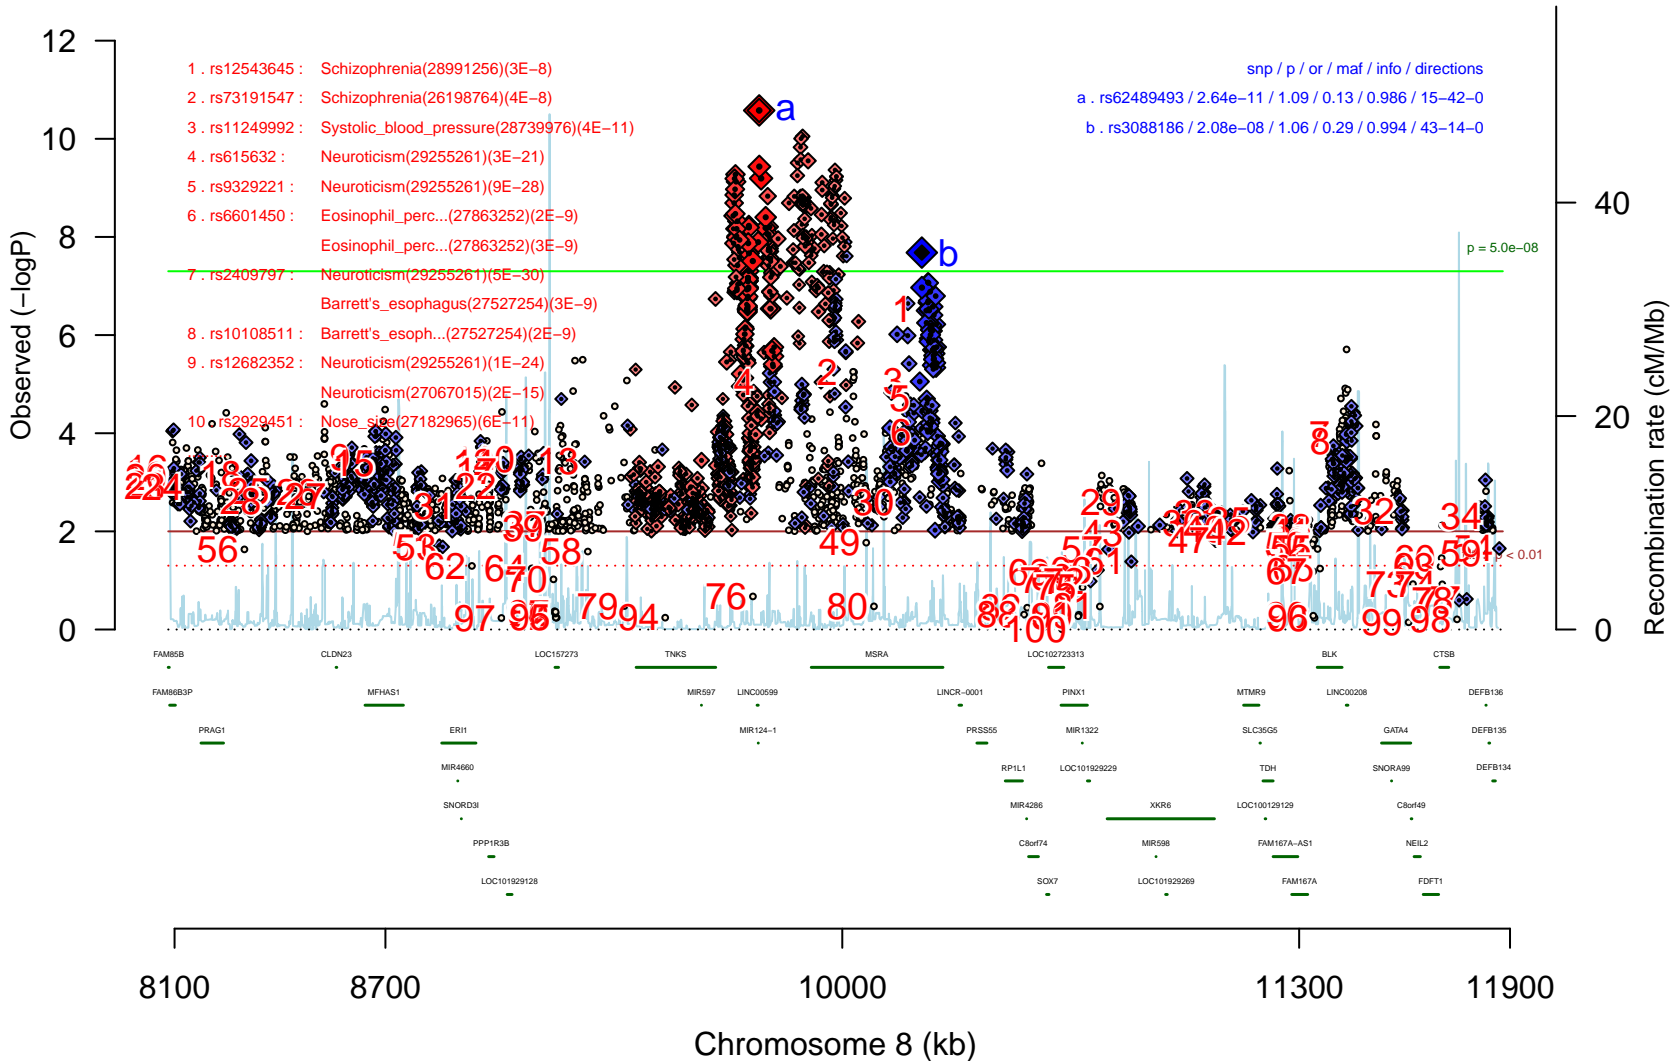

# bip\_pgc3.15.chr5

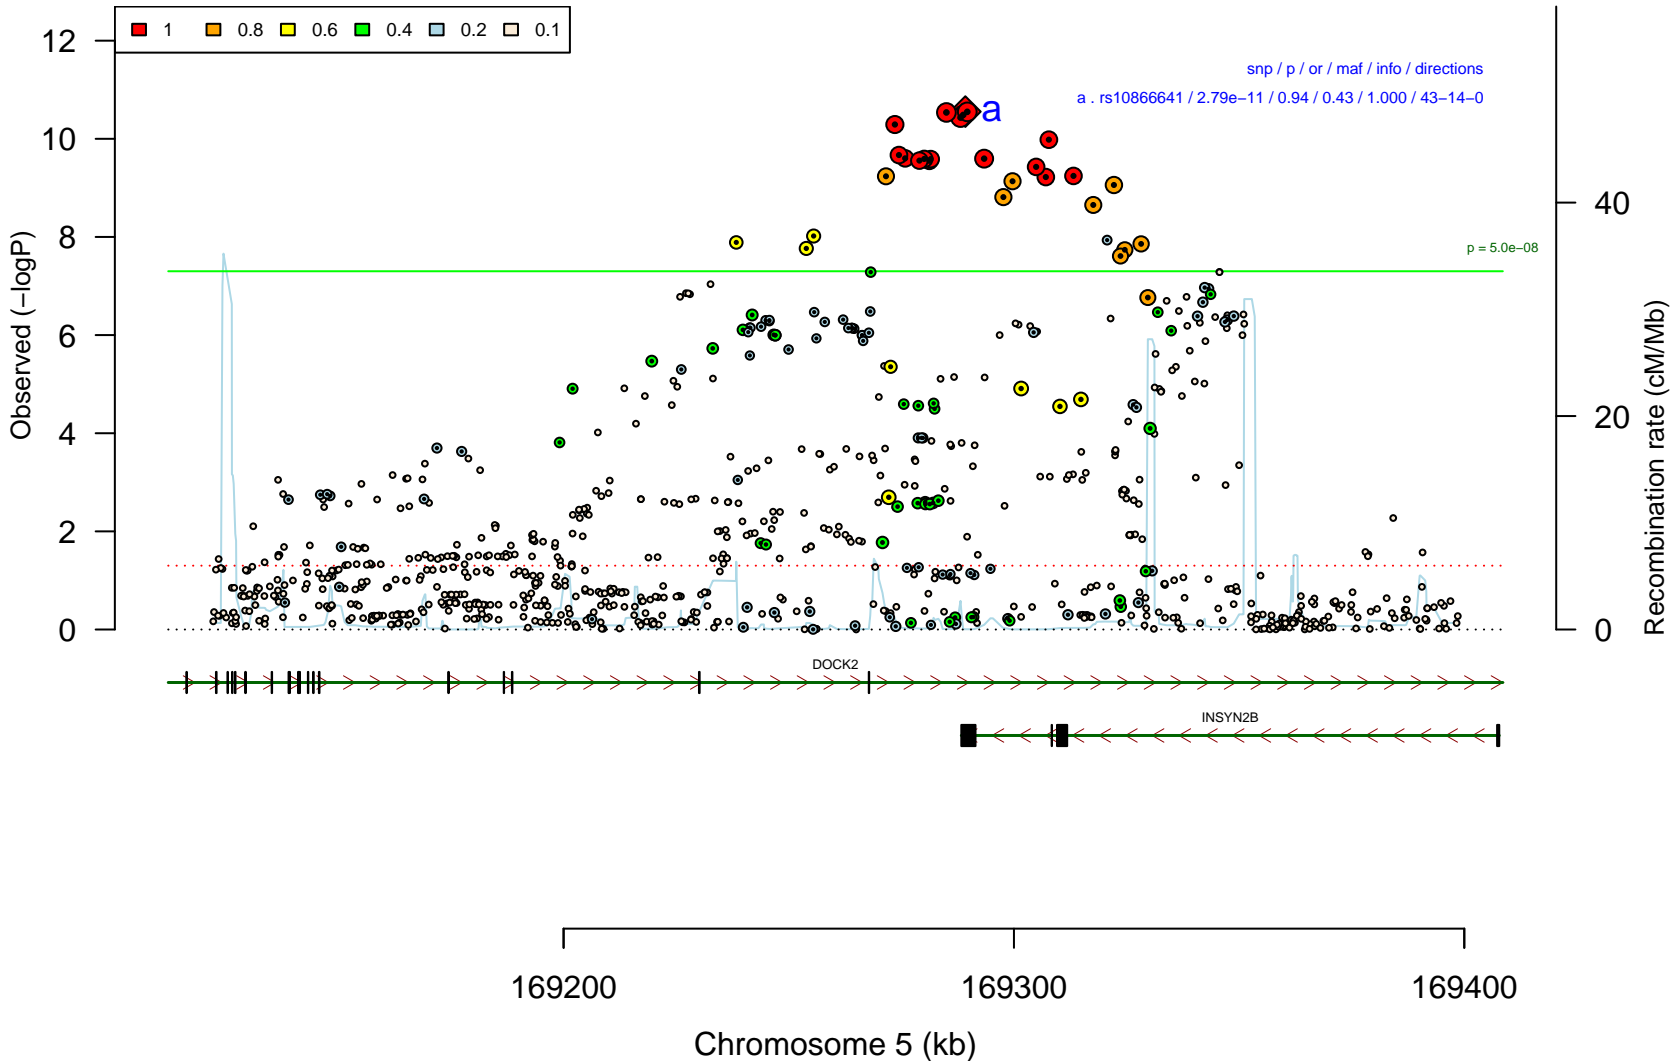

# bip\_pg3.55.chr20

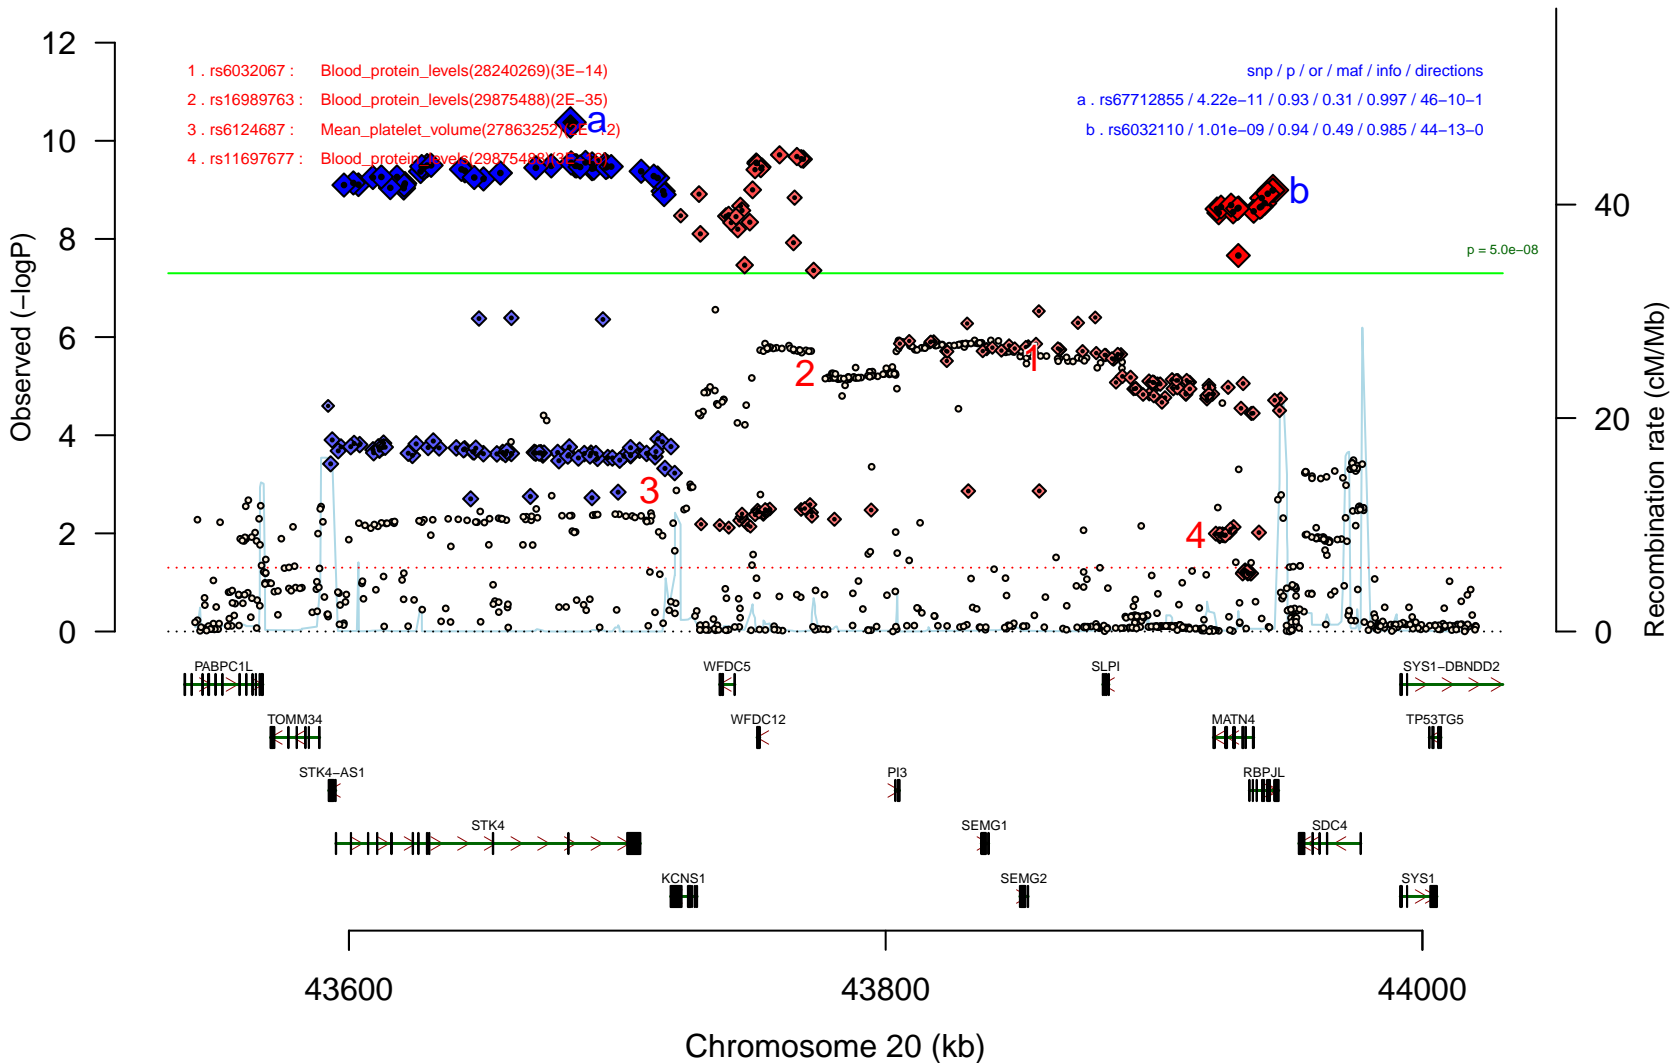

# bip\_pgc3.2.chr2

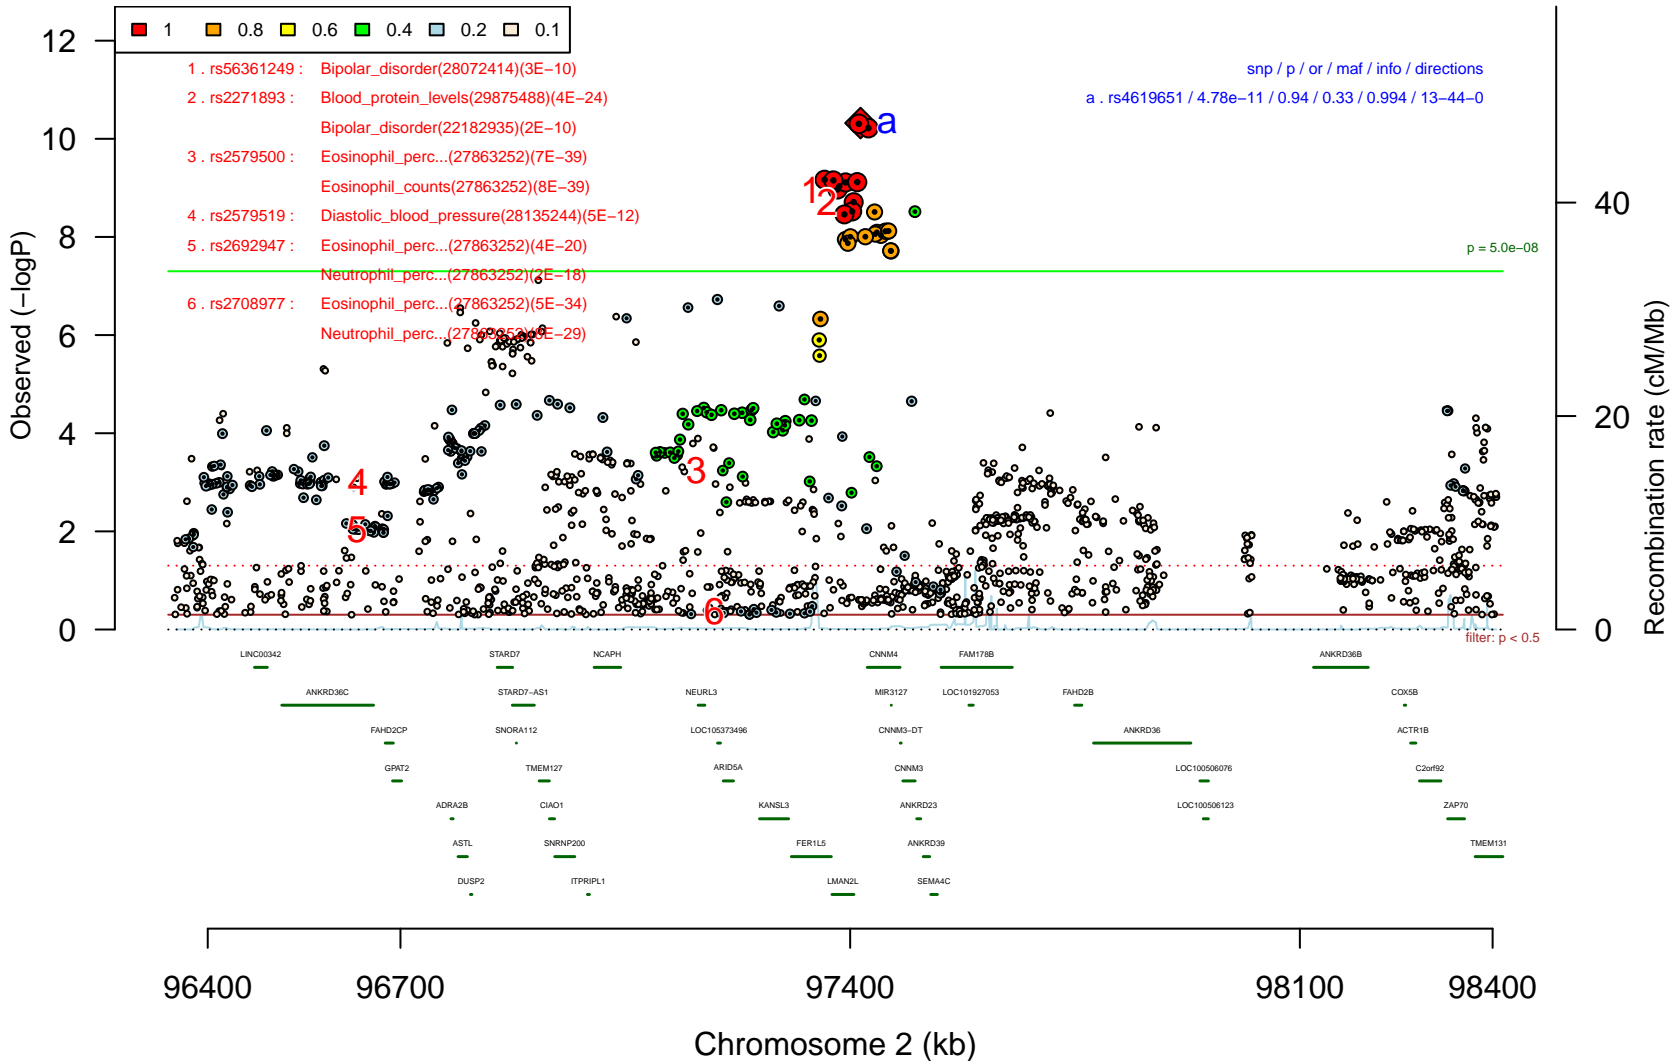

# bip\_pgc3.47.chr15

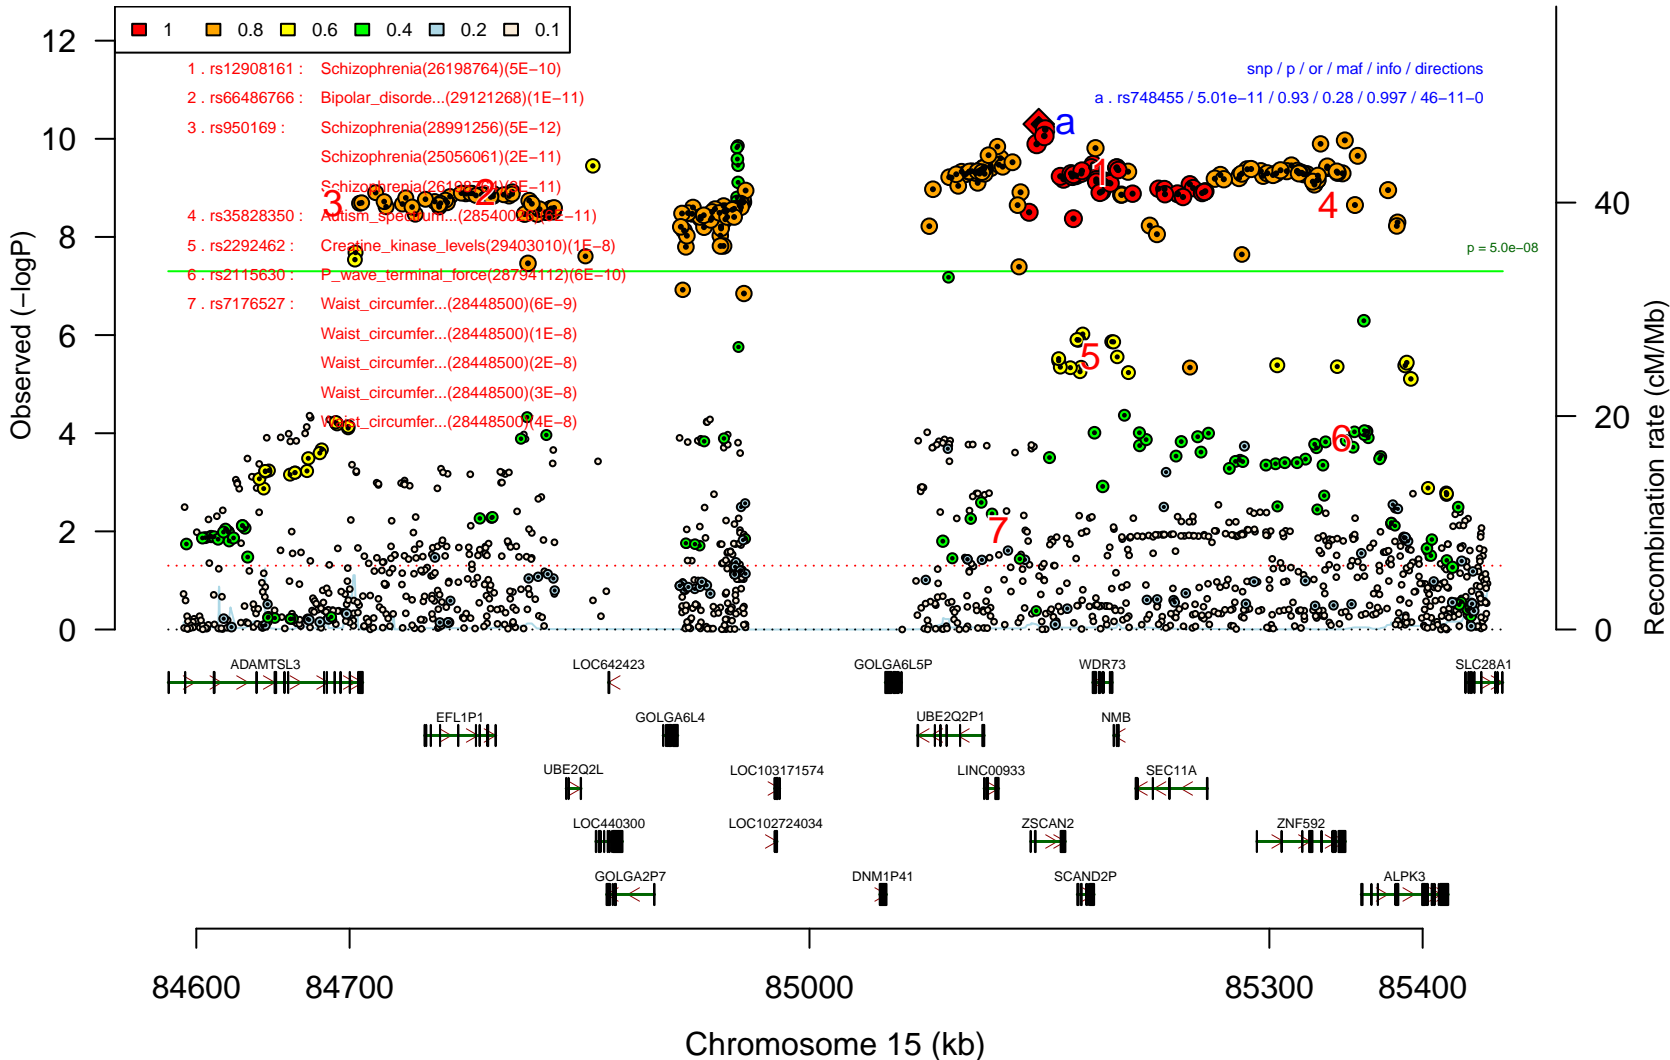

# bip\_pgc3.39.chr11

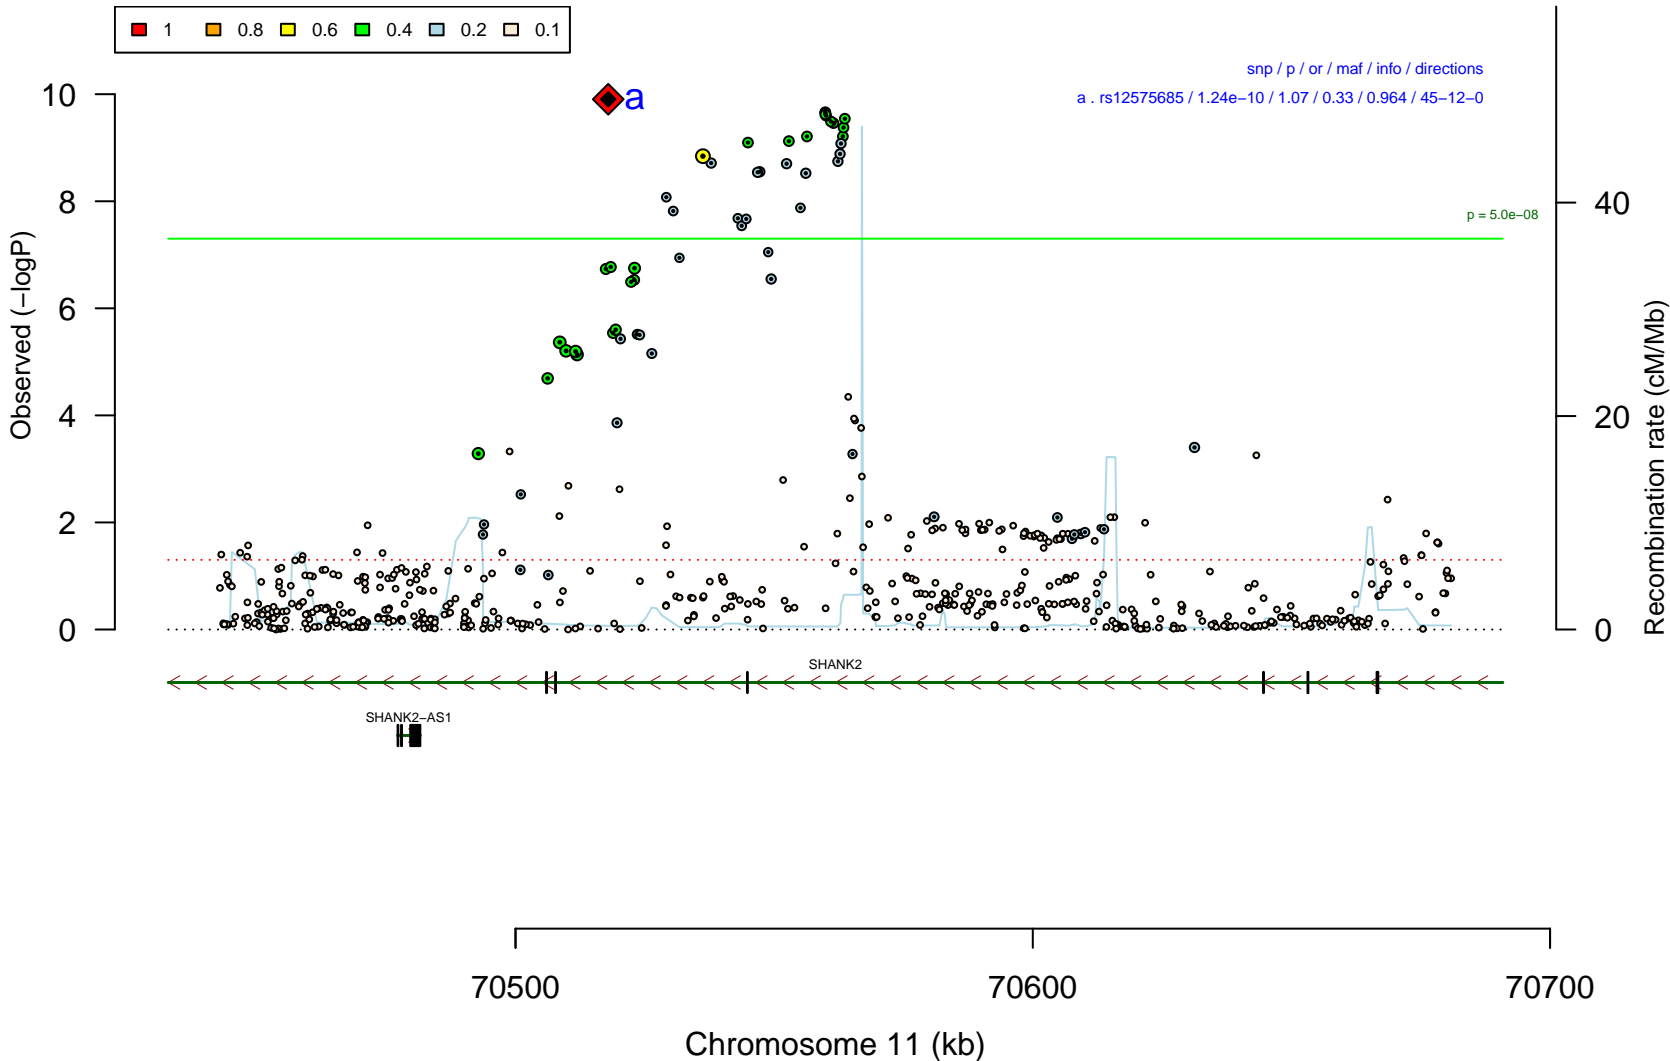

# bip\_pgc3.49.chr16

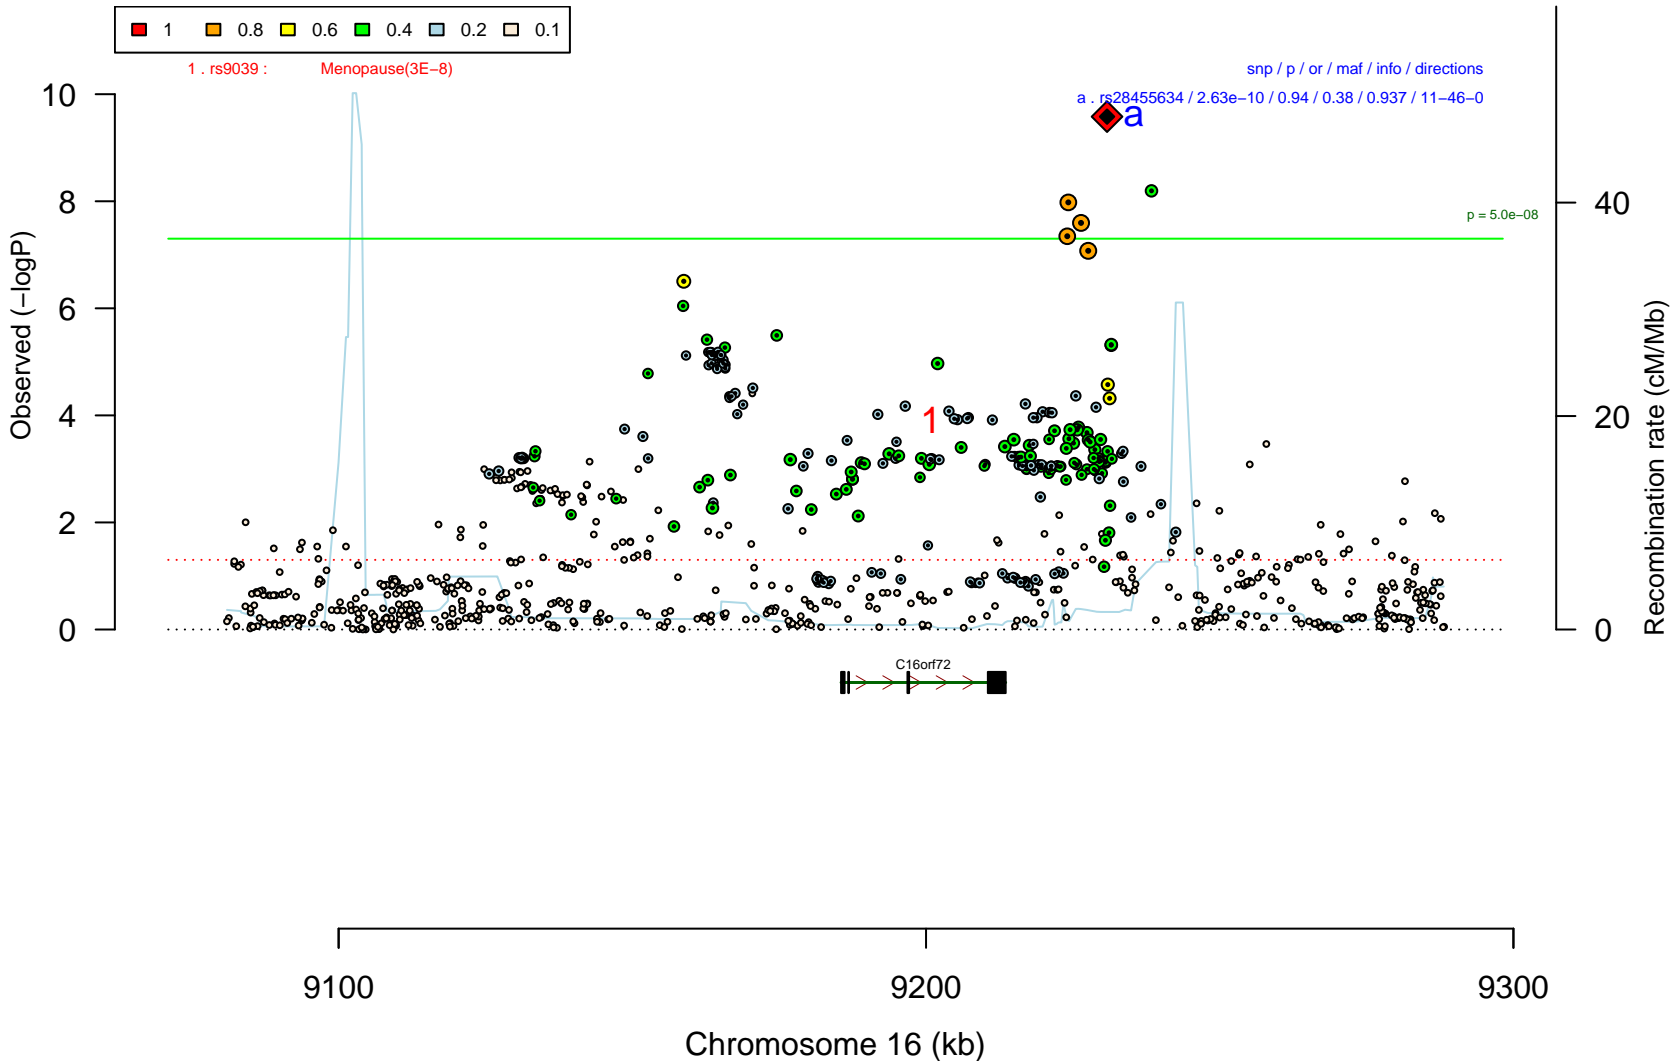



# bip\_pgc3.54.chr17

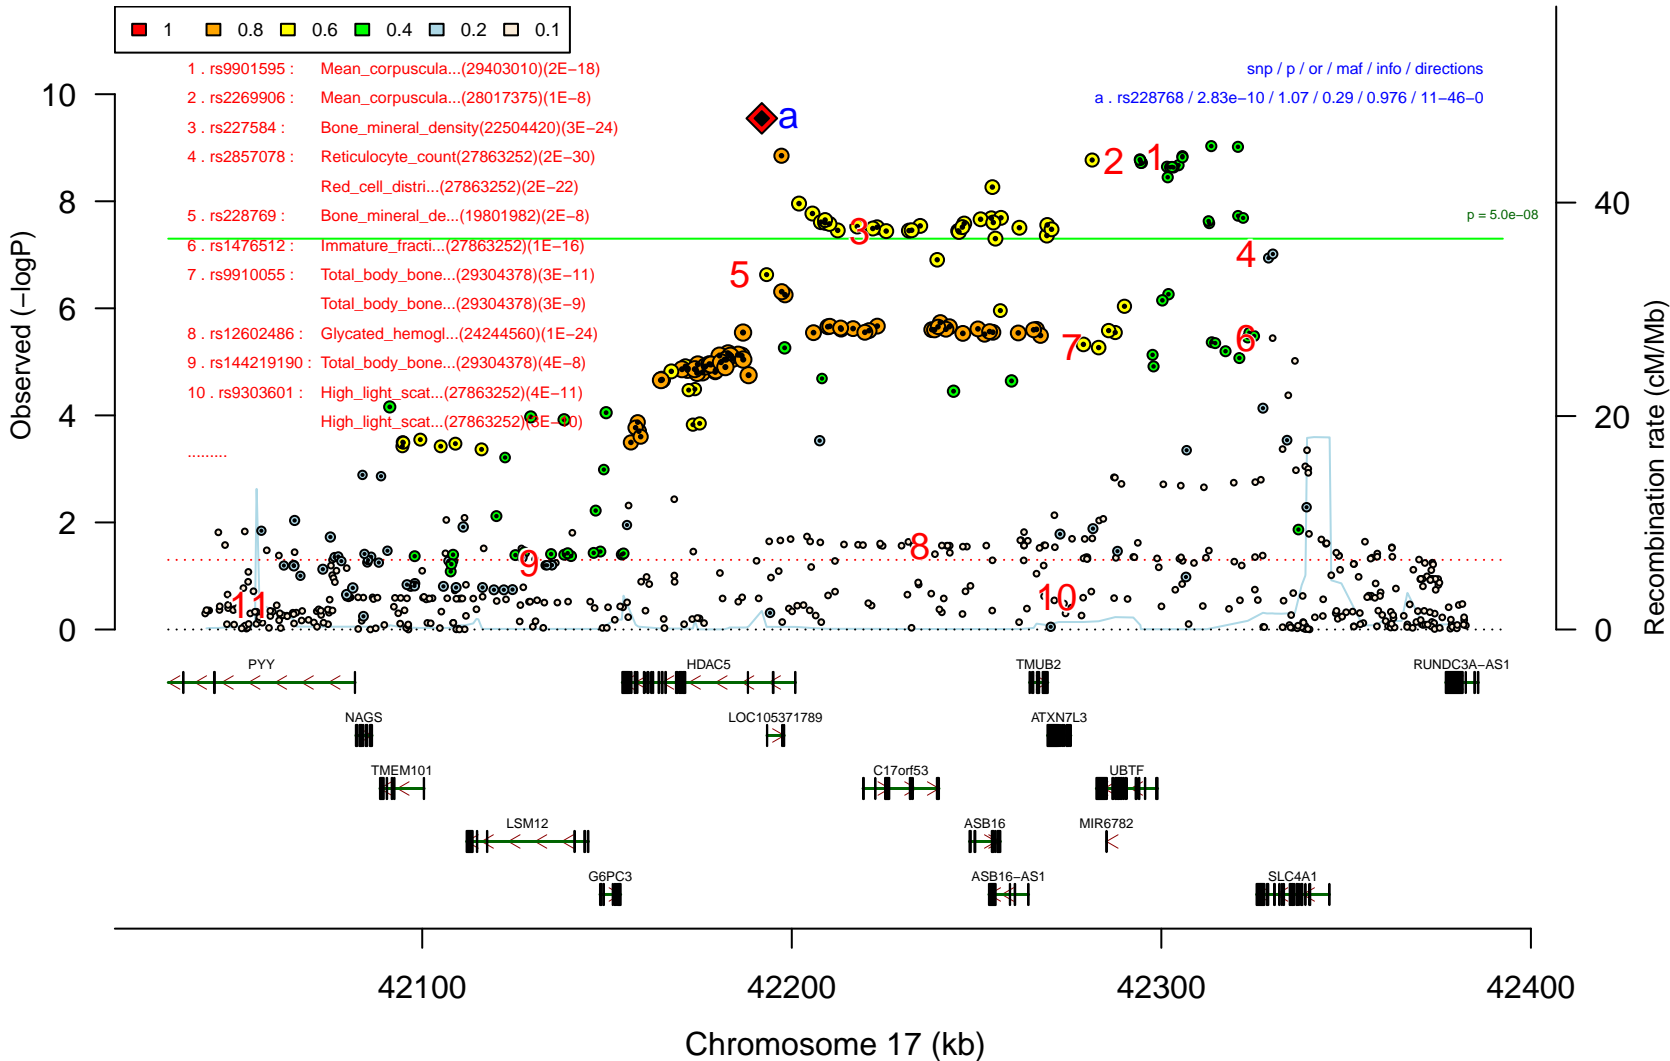

# bip\_pgc3.22.chr7

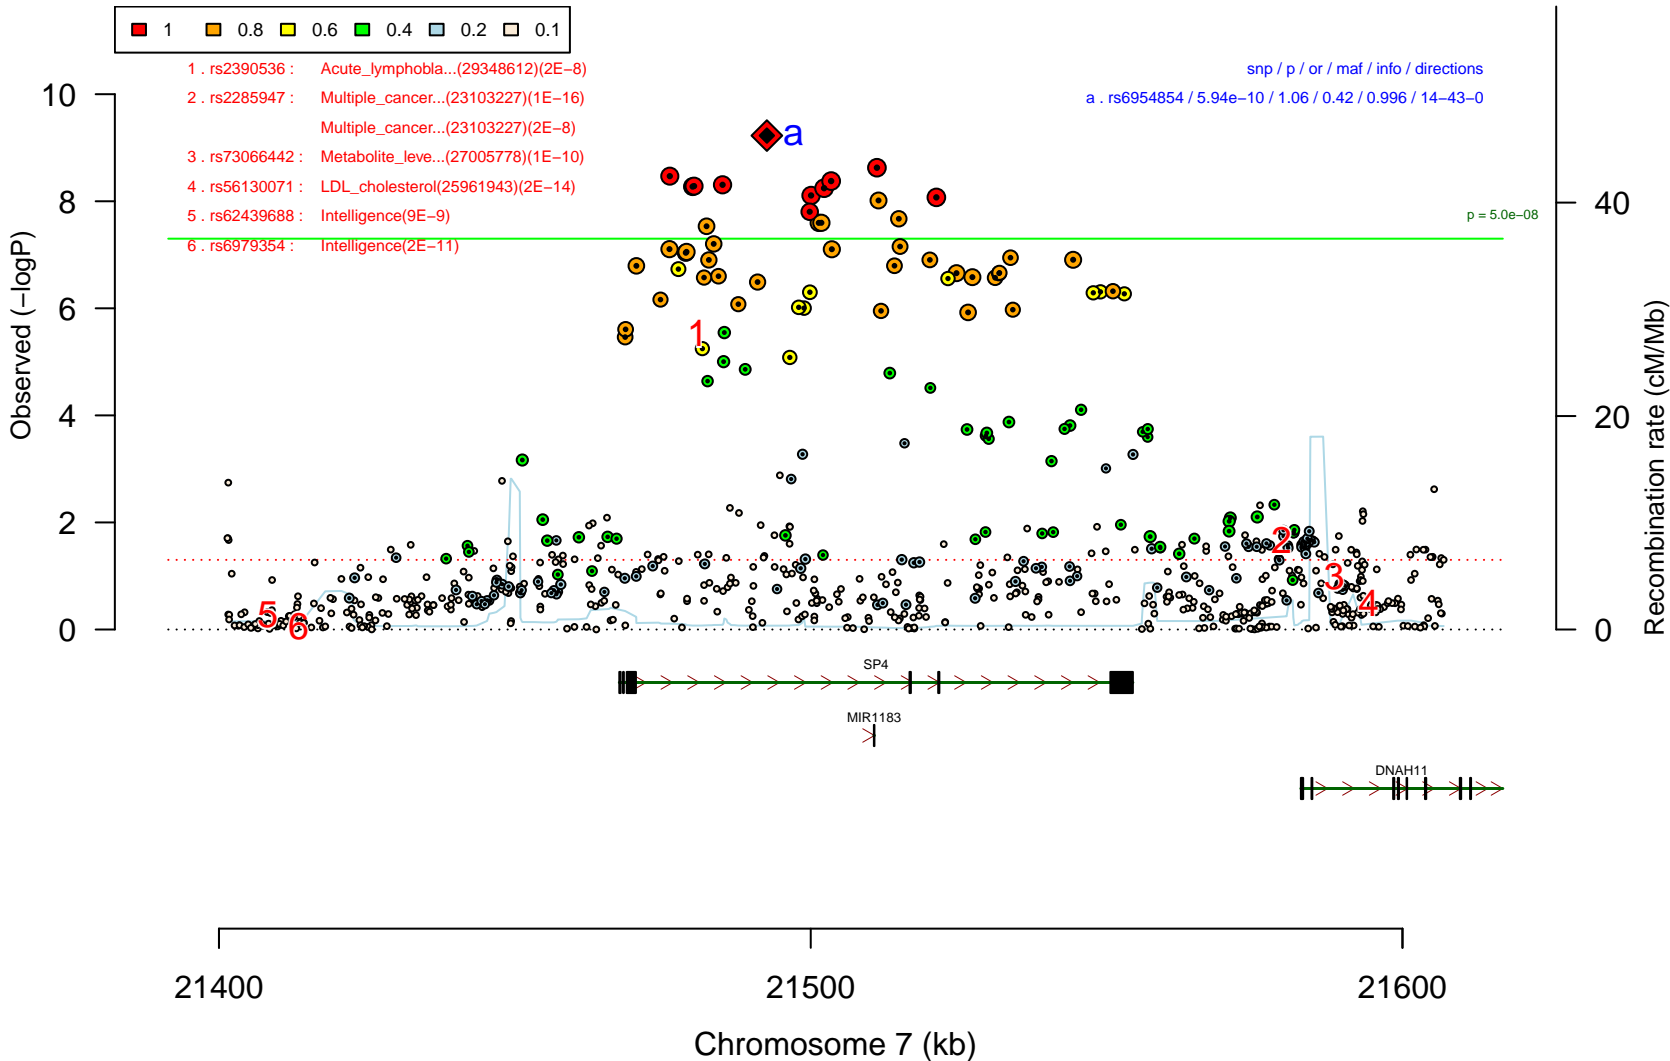

# bip\_pgc3.0.chr1

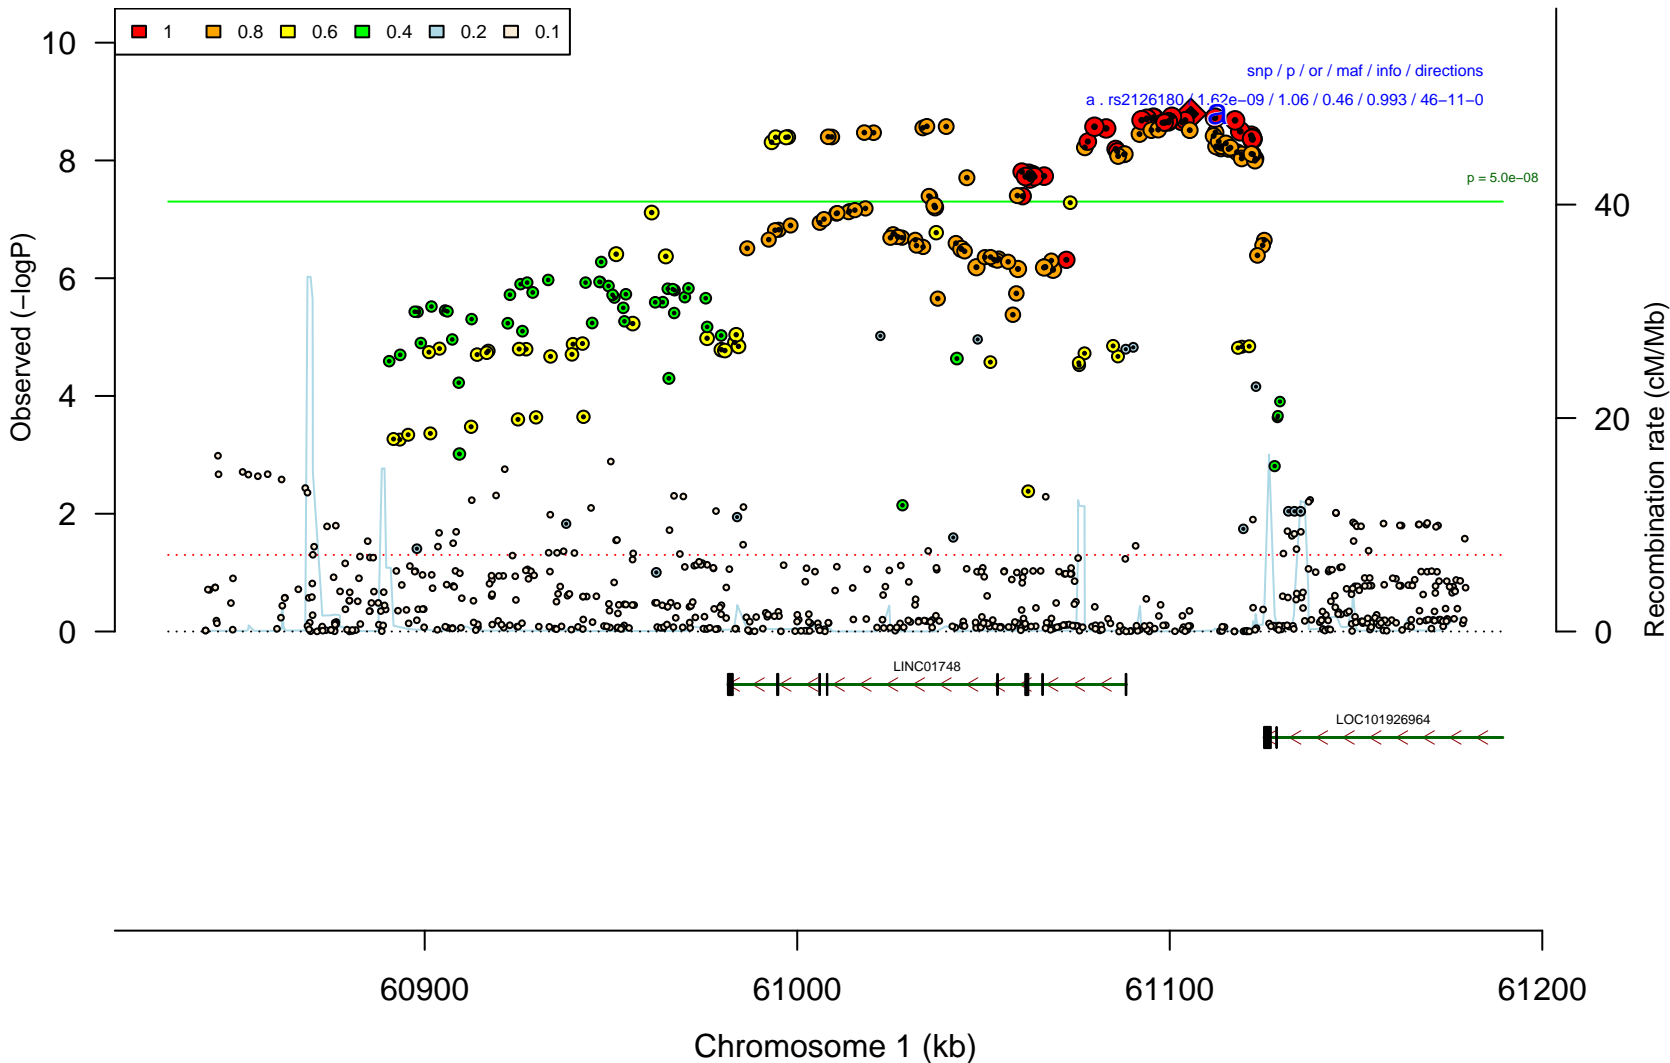

# bip\_pgc3.29.chr8

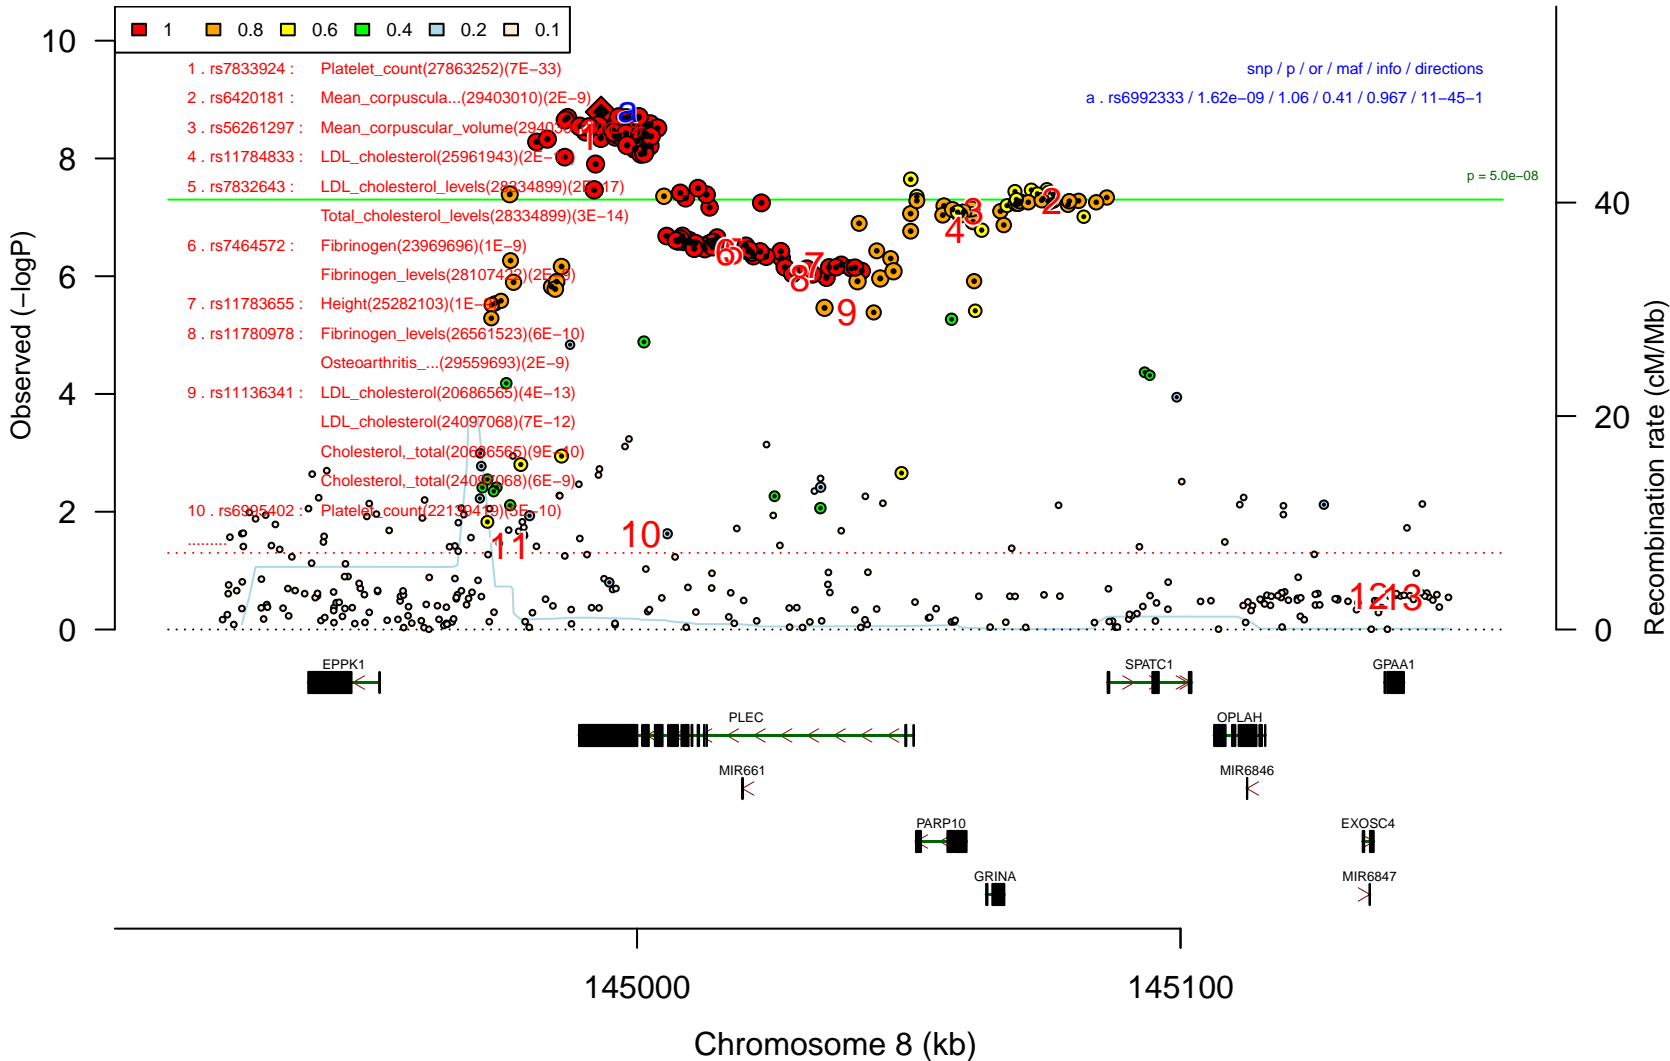

# bip\_pgc3.10.chr4

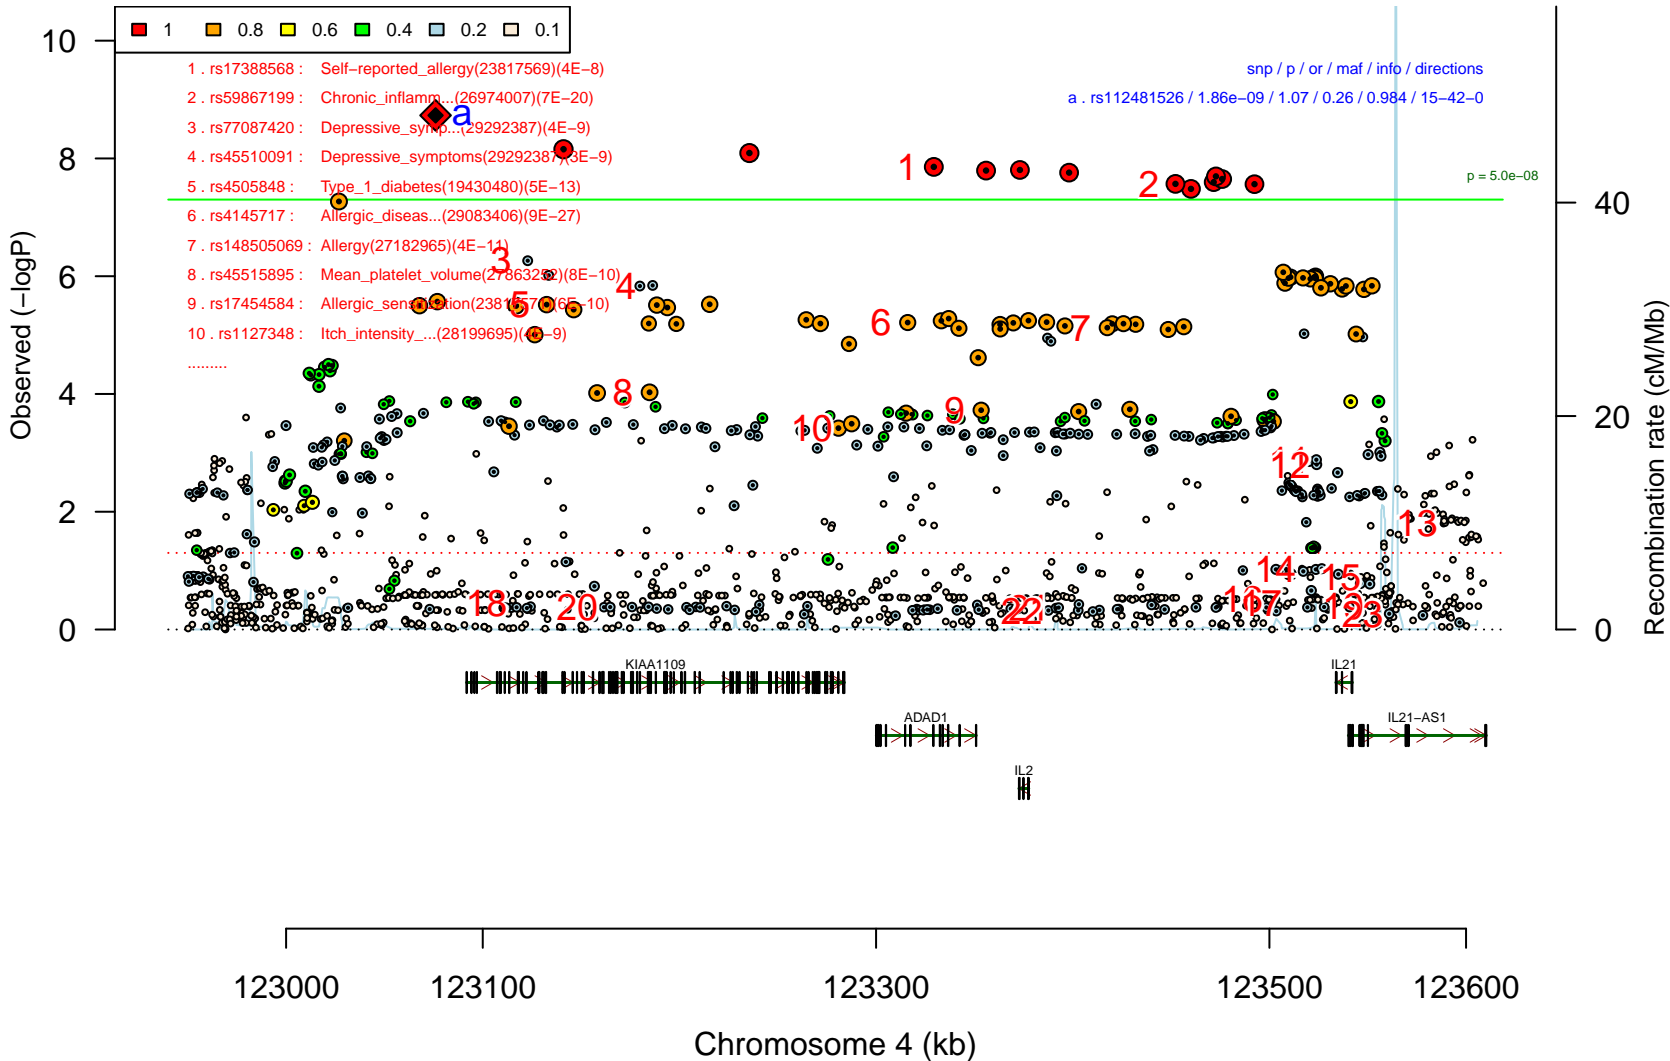

# bip\_pgc3.20.chr7

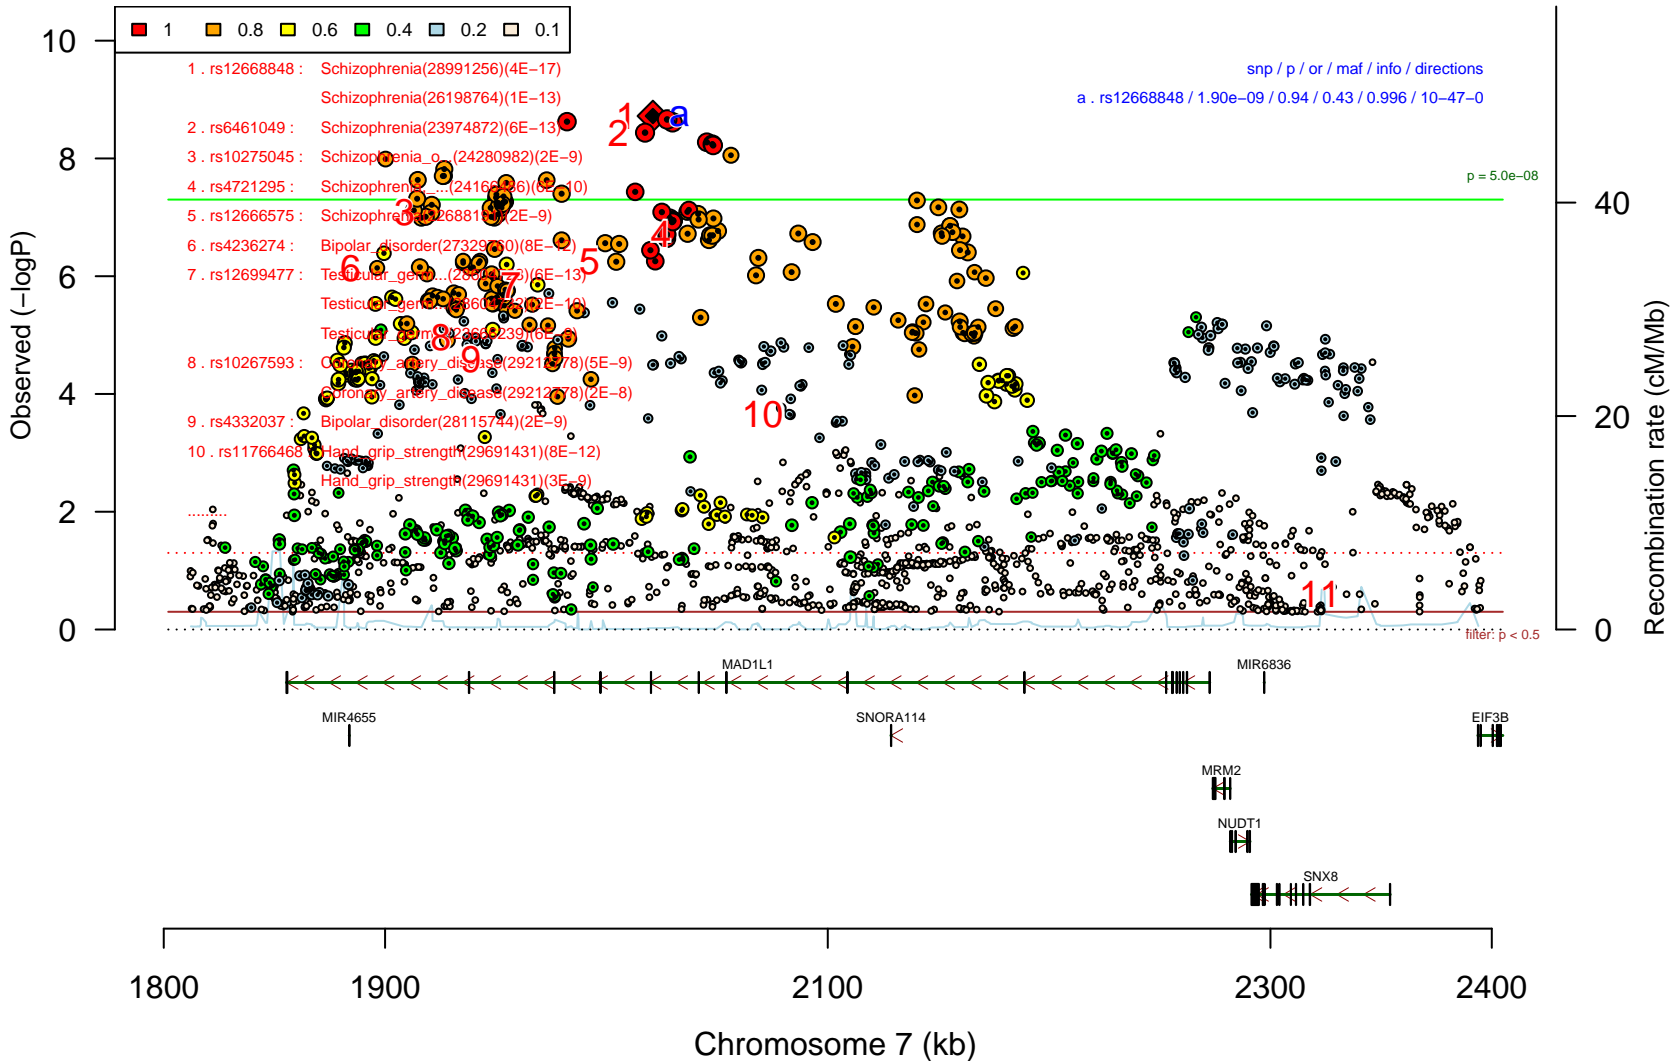

# bip\_ggc3.11.chr5

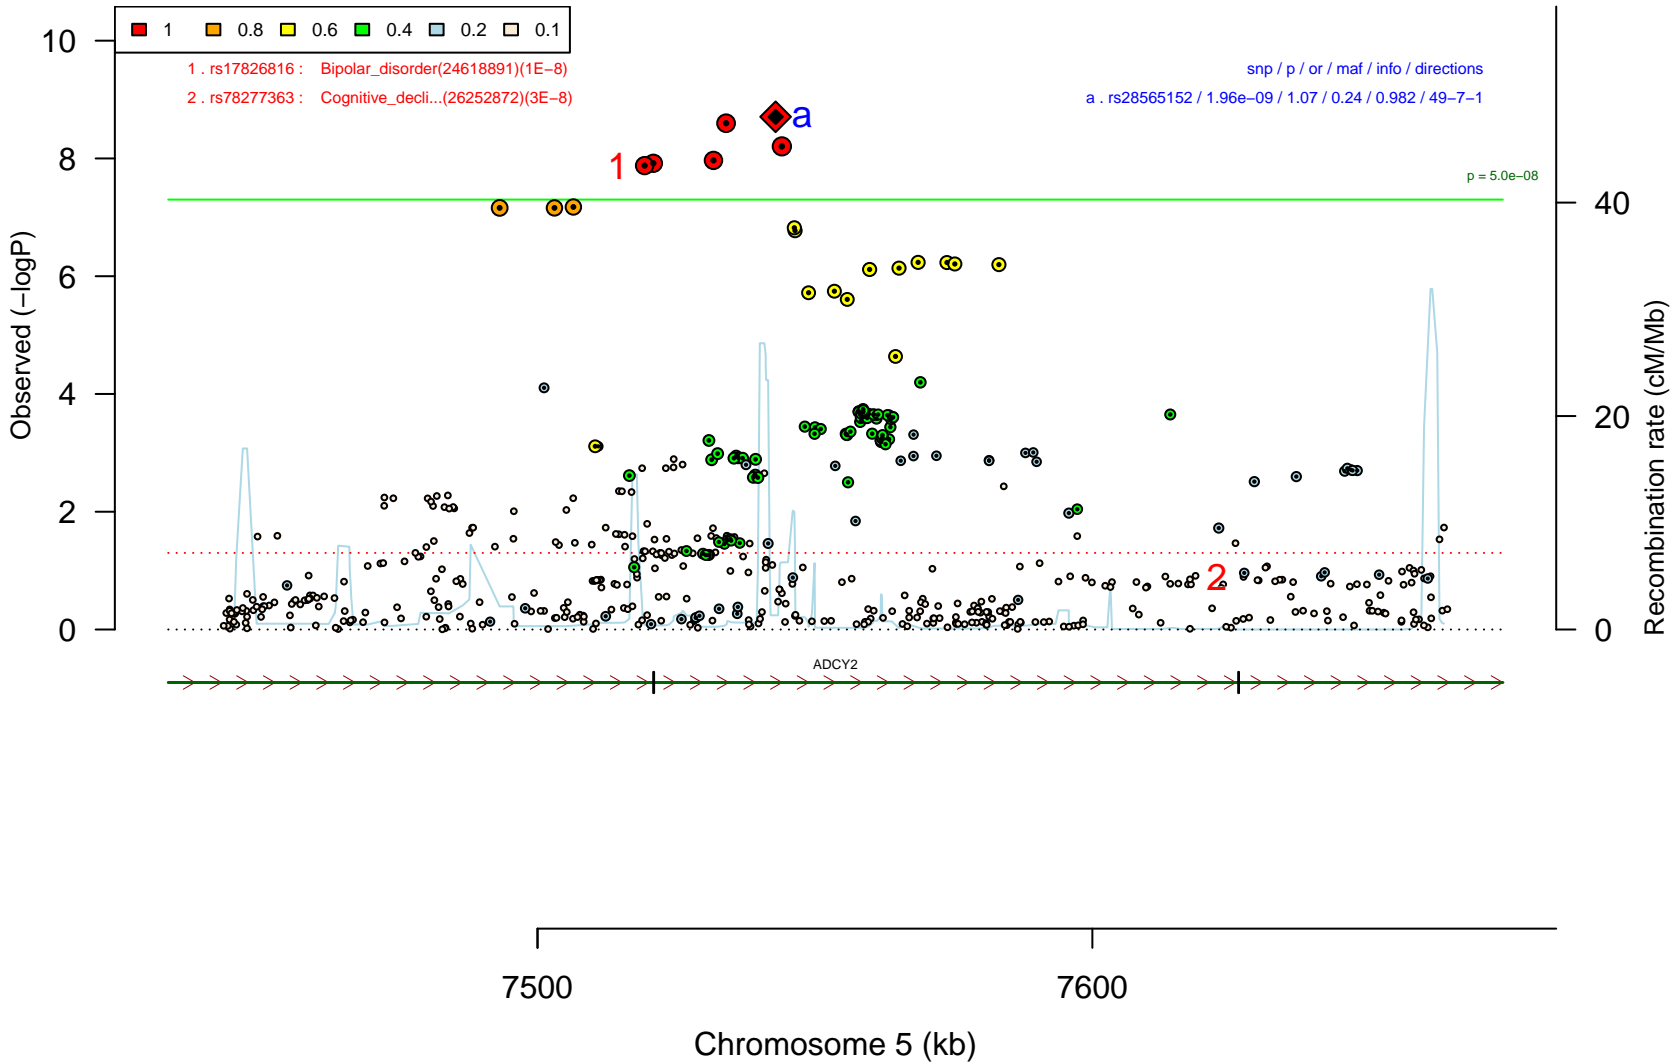

# bip\_pgc3.38.chr11

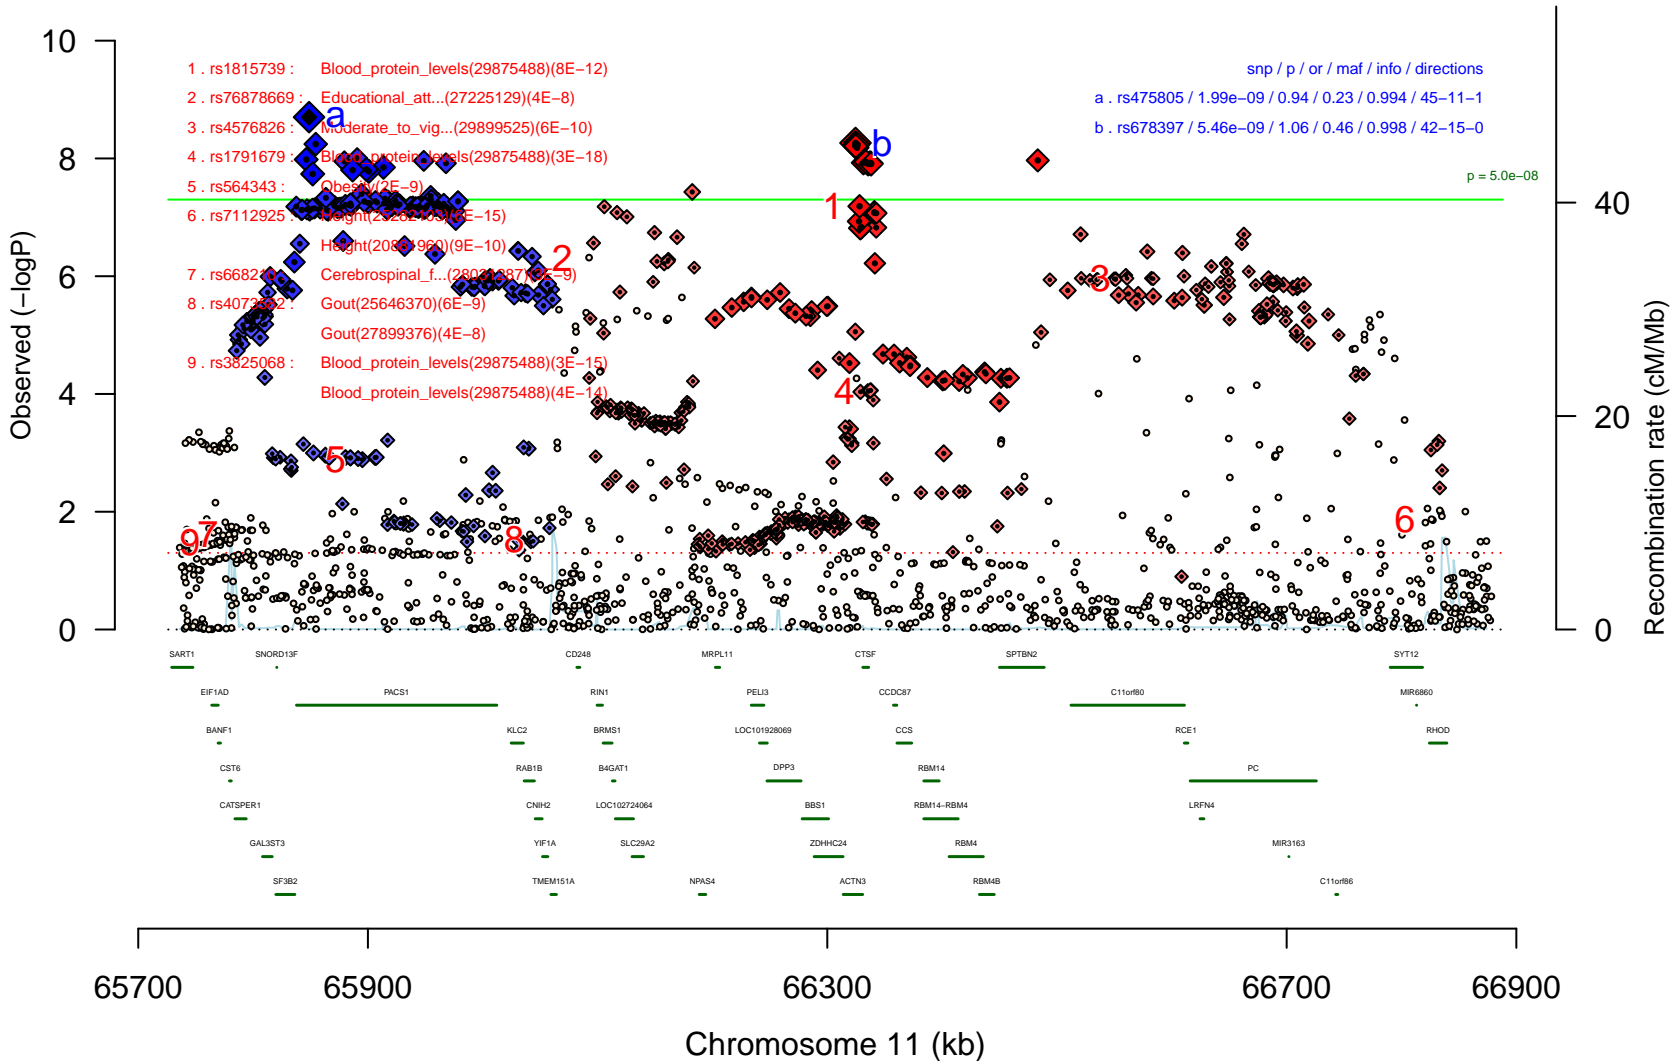



# bip\_pgc3.45.chr15

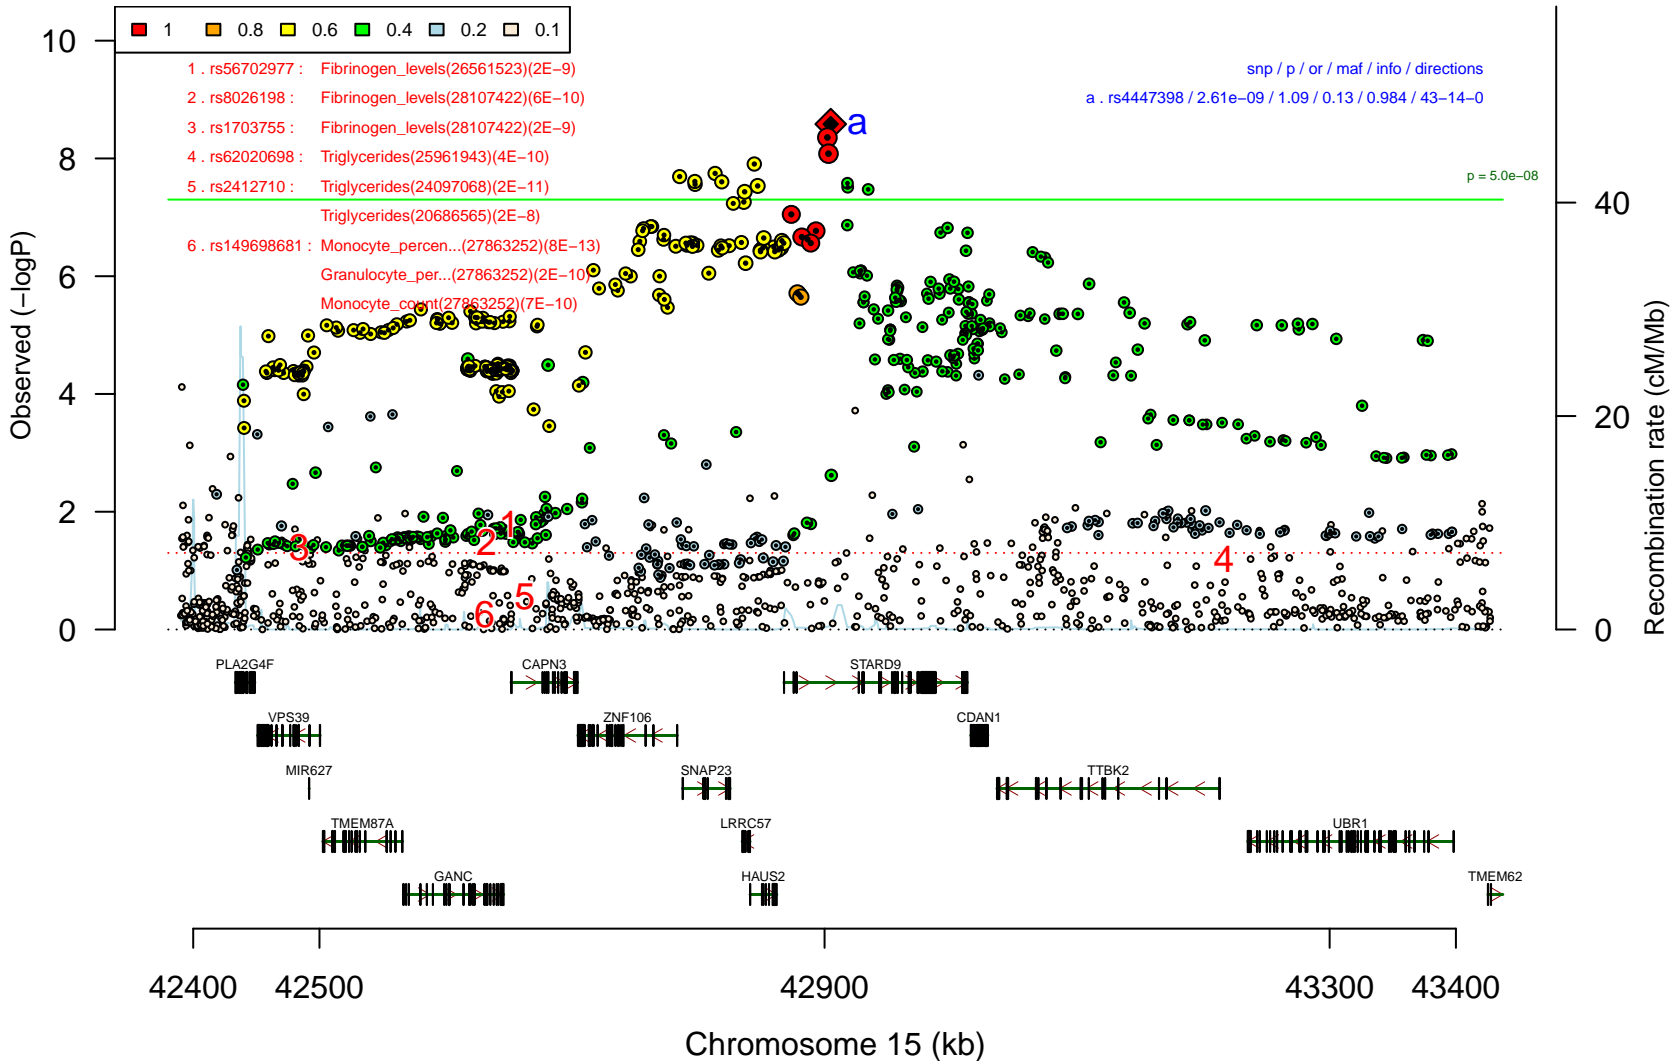

# bip\_pgc3.23.chr7

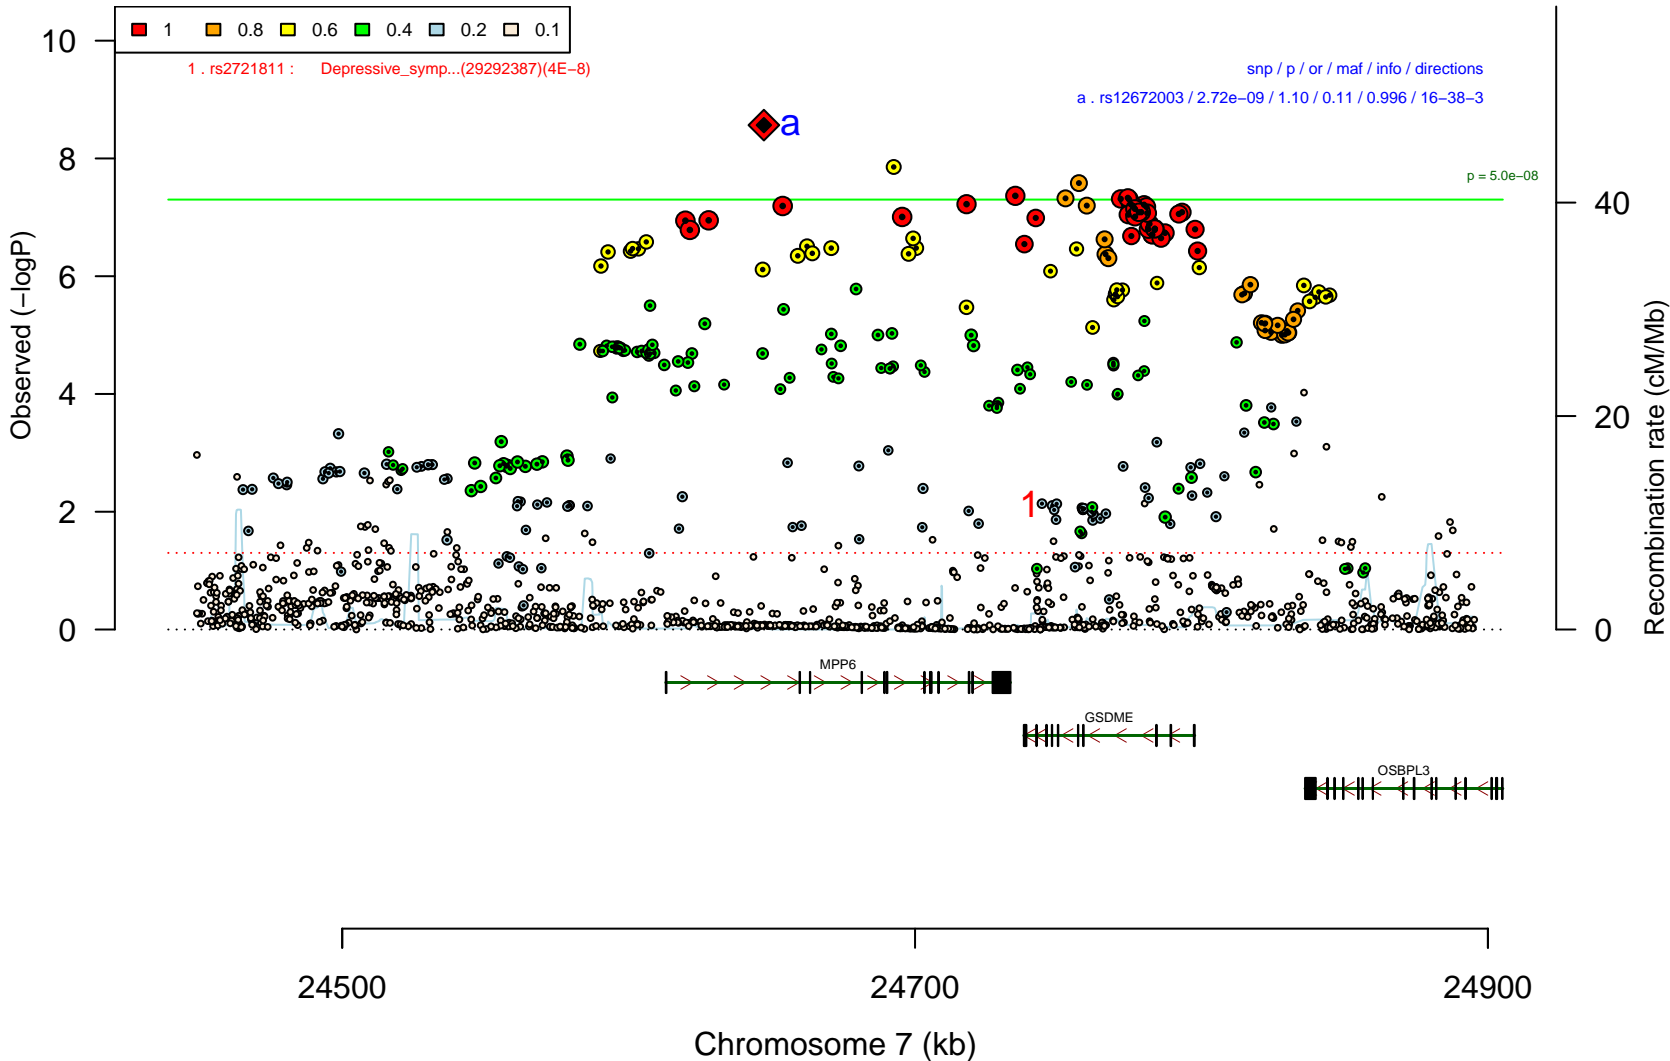

# bip\_pgc3.37.chr11

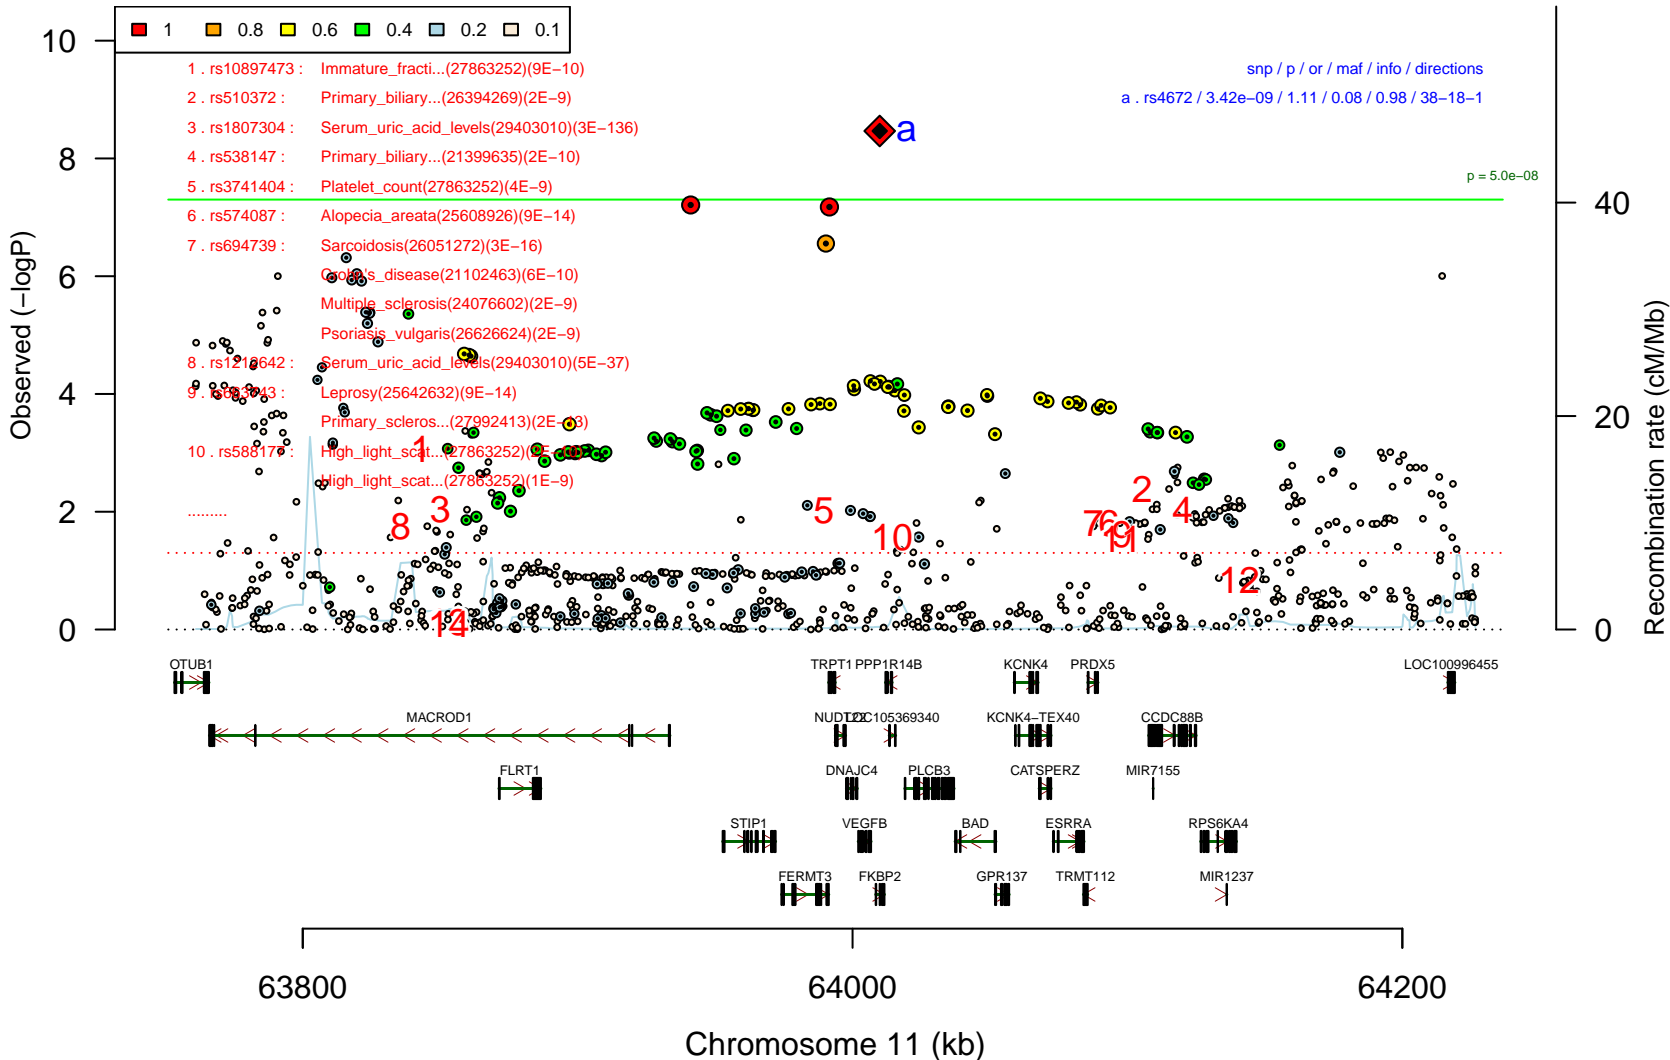

# bip\_pgc3.24.chr7

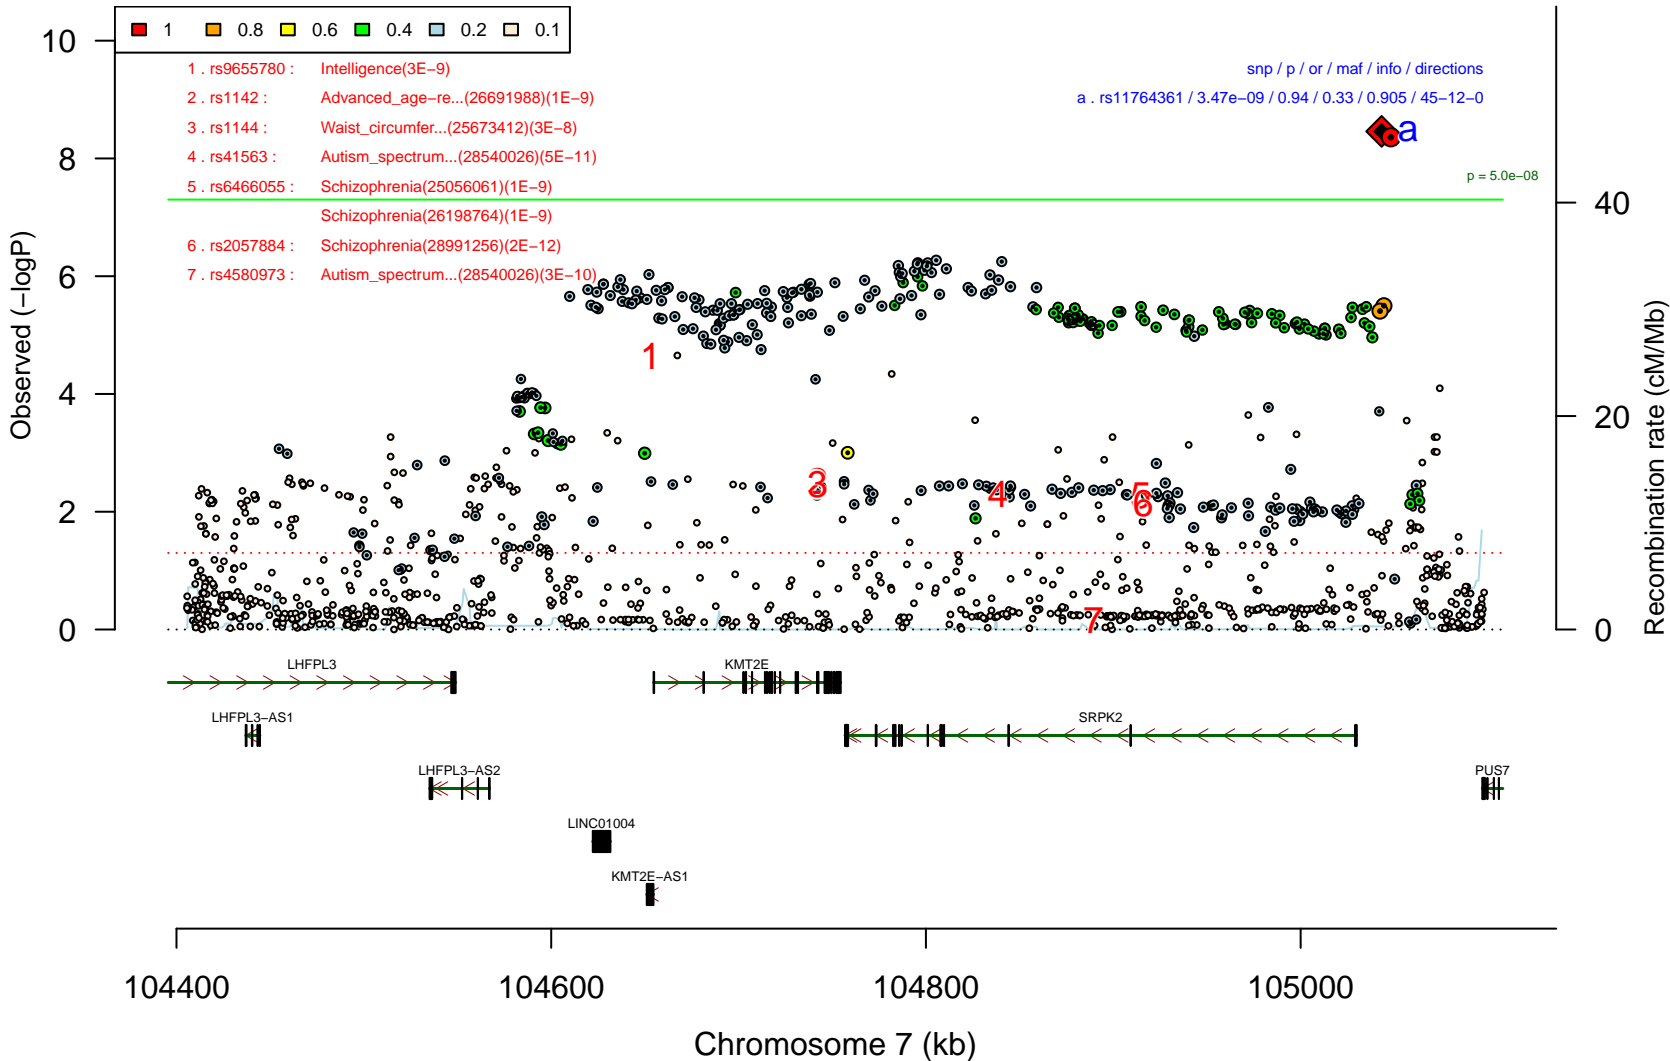

# bip\_pgc3.48.chr15

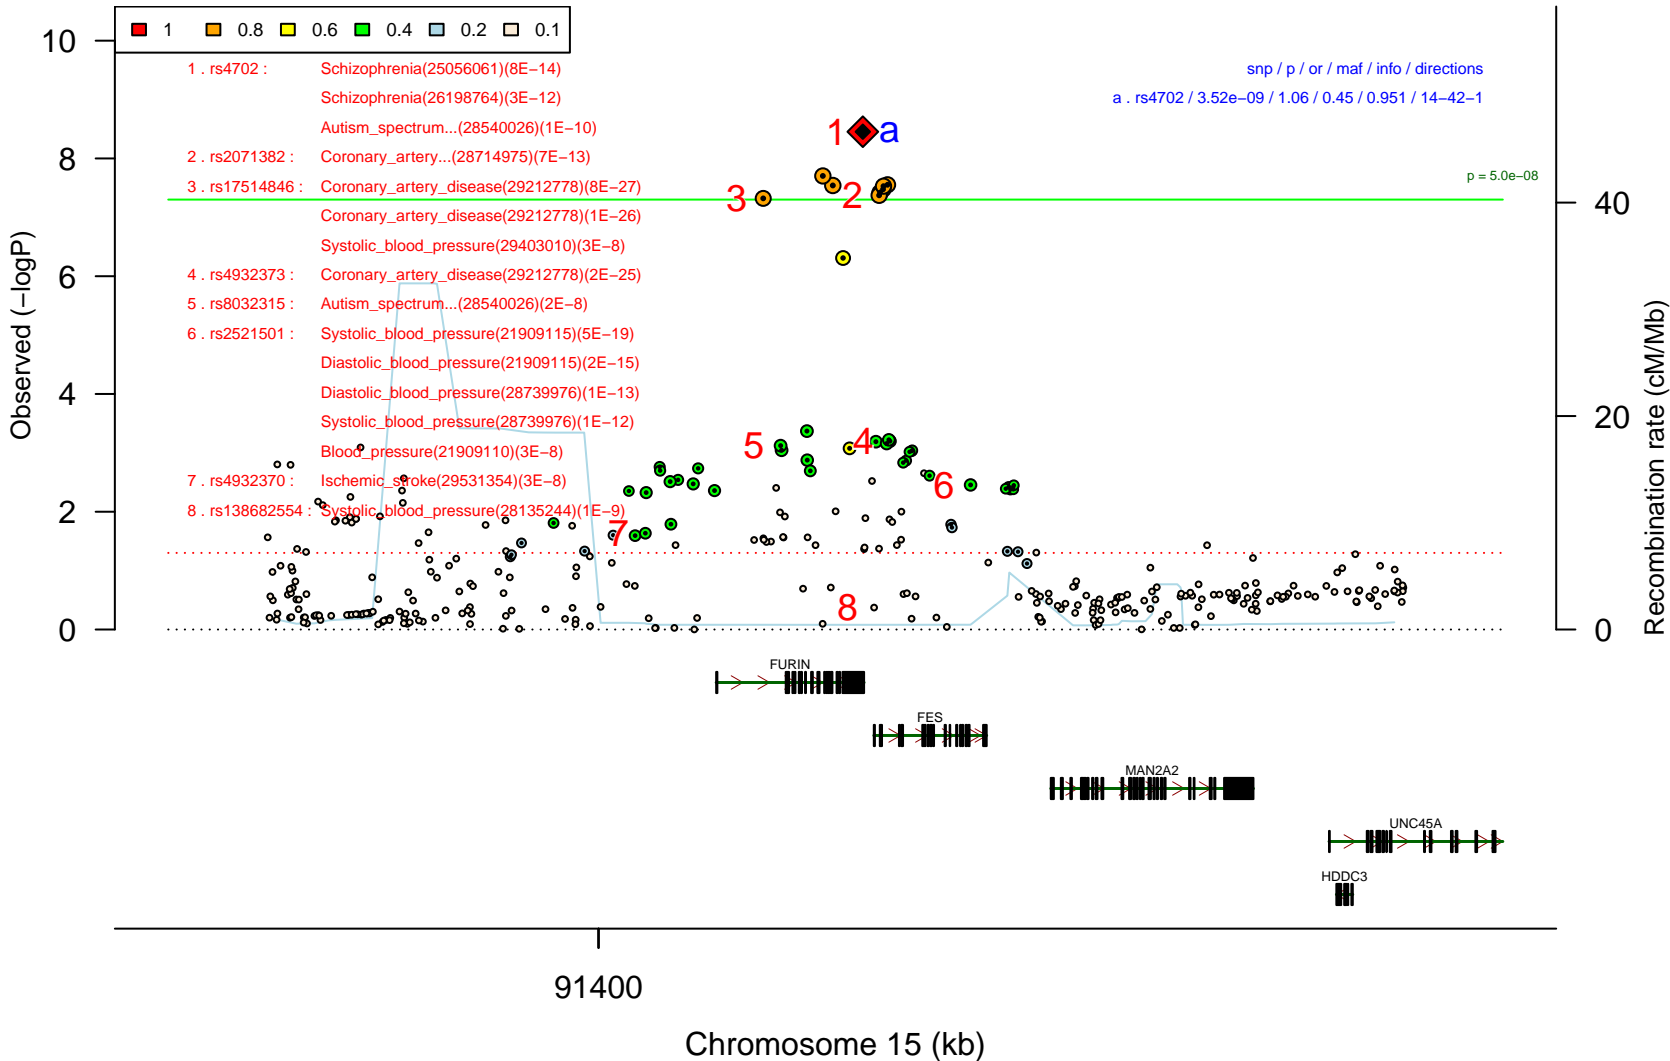

# bip\_pg3.42.chr13

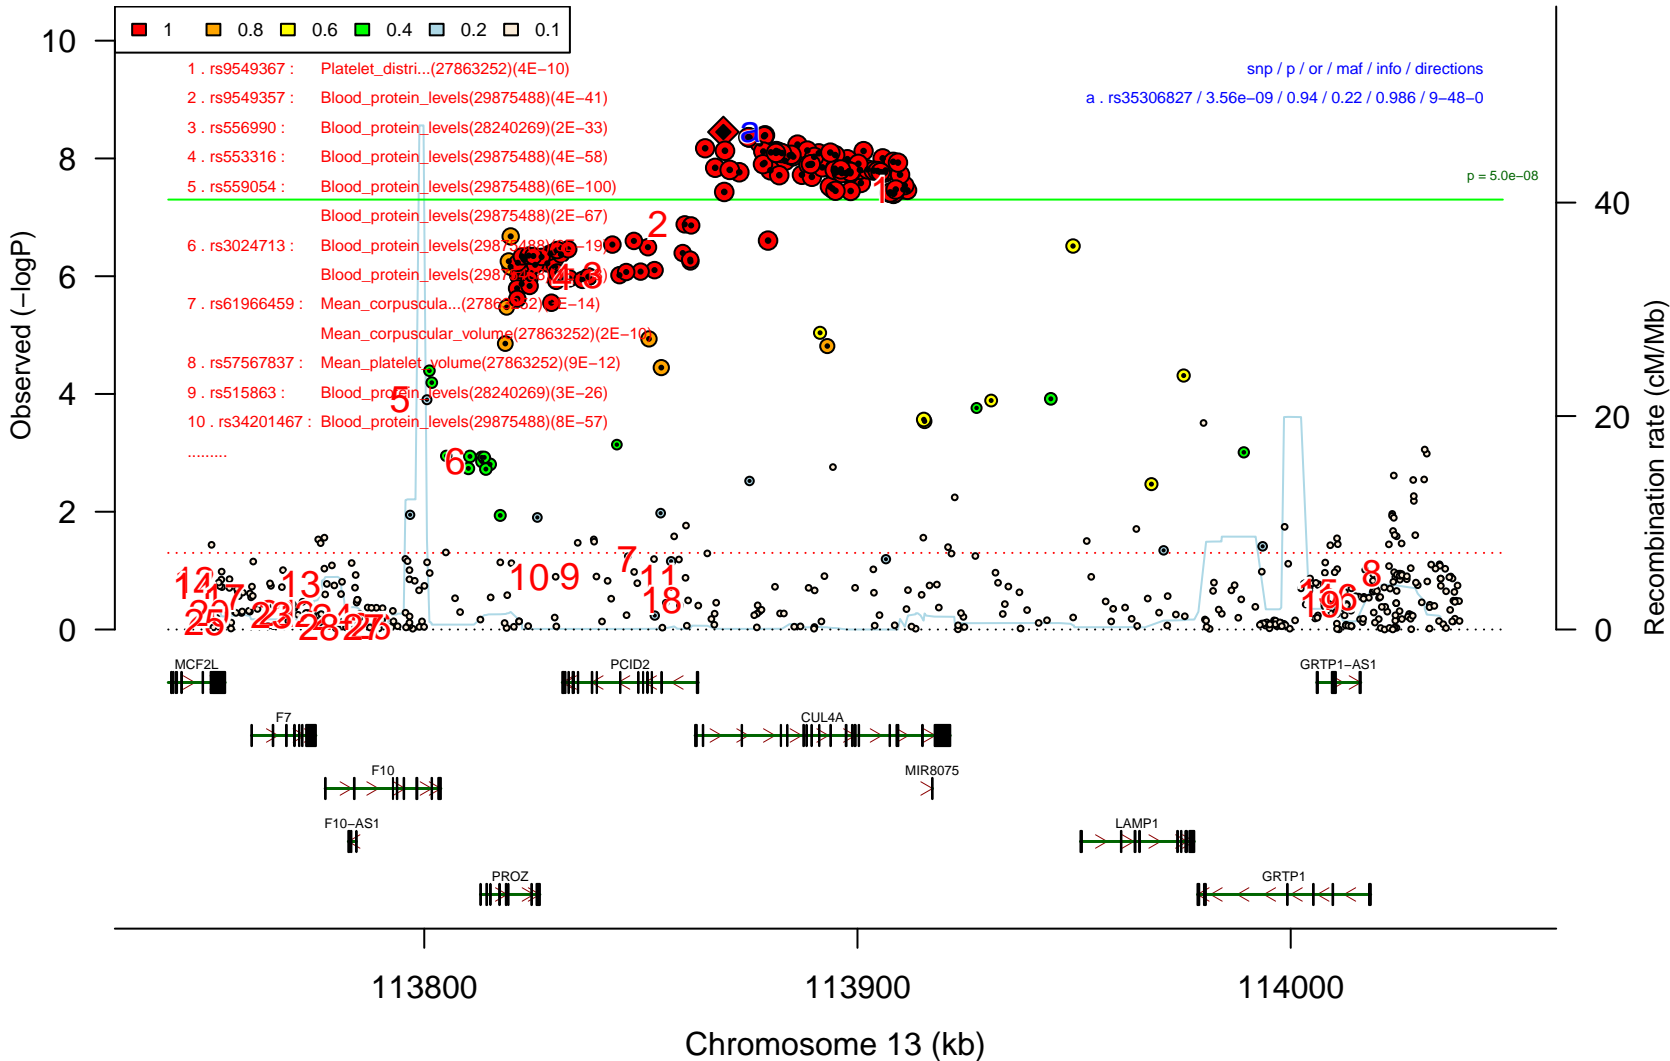

# bip\_pgc3.19.chr6

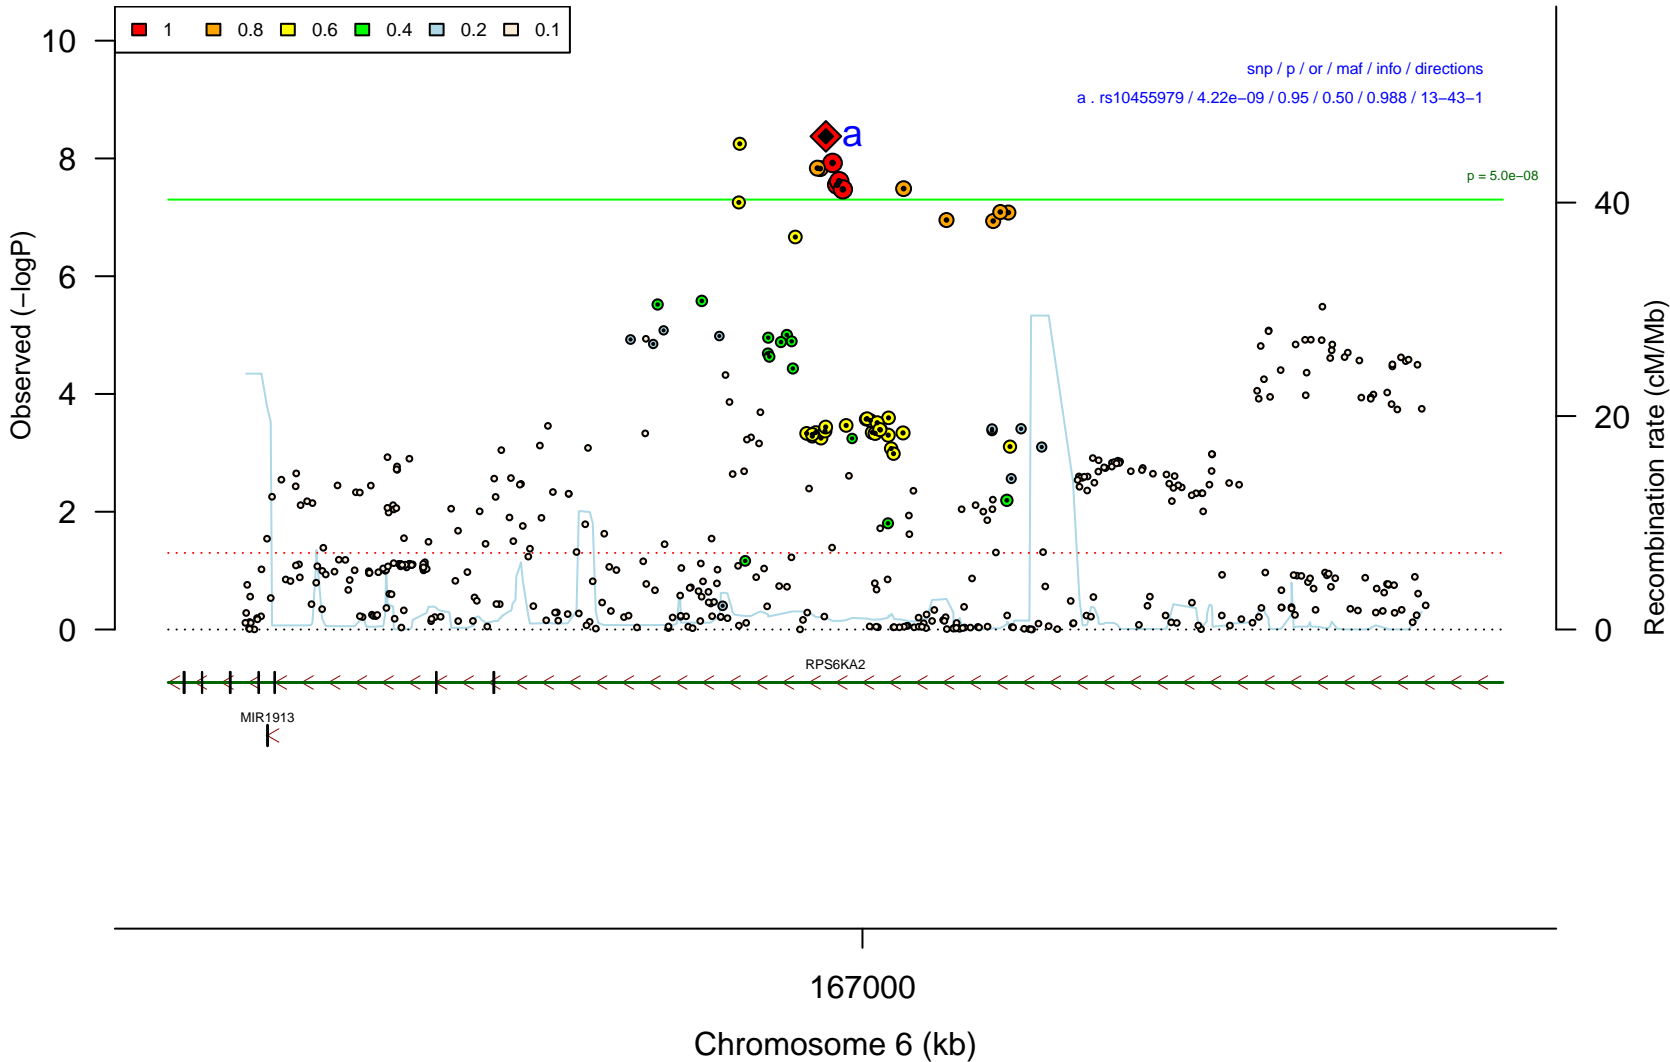

# bip\_pgc3.56.chr20

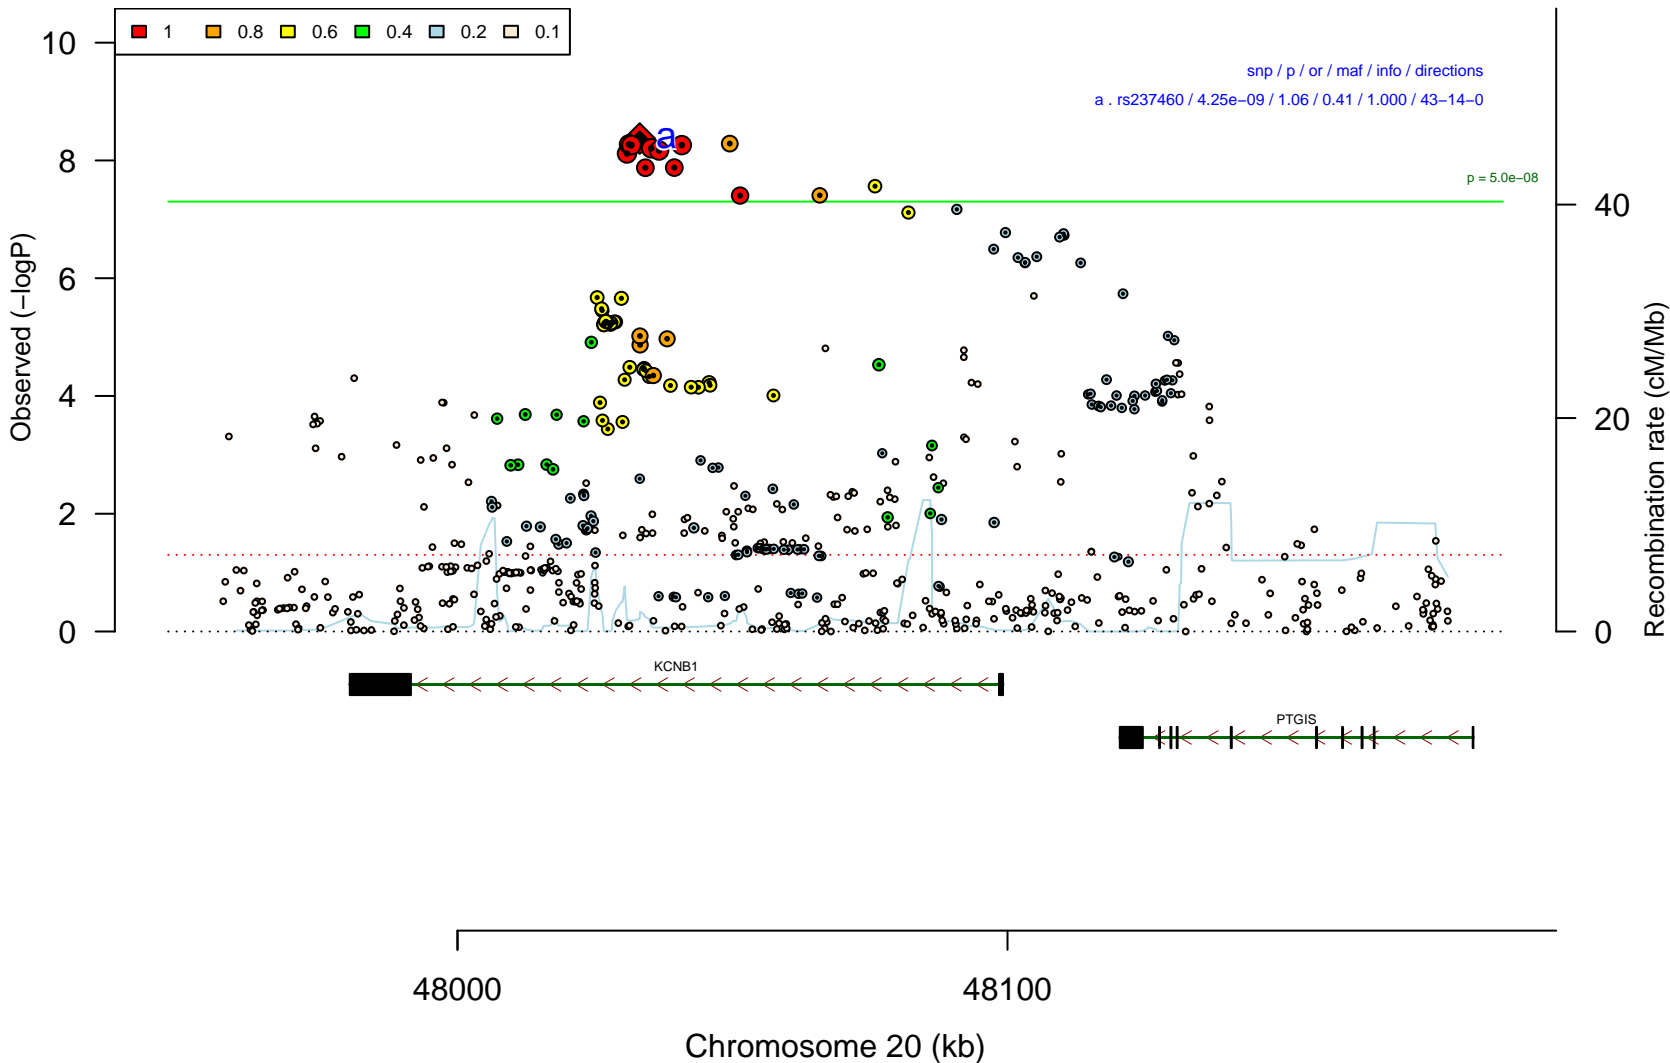



# bip\_pgc3.28.chr8

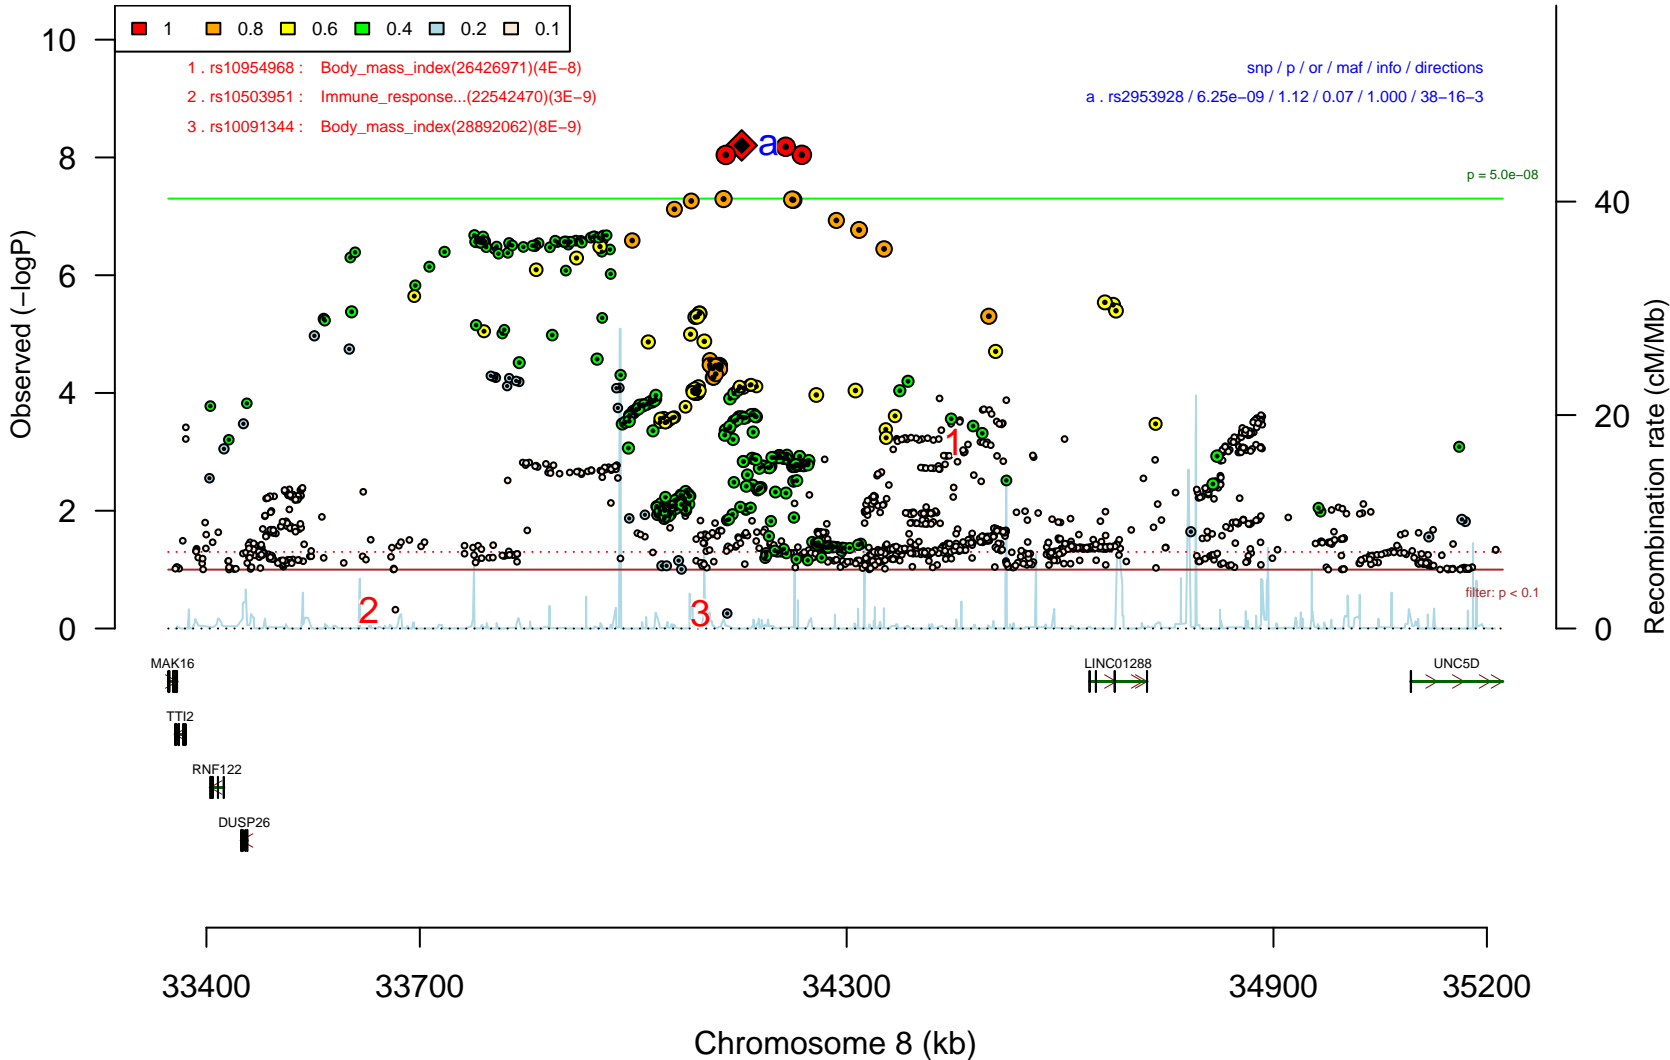

# bip\_pgc3.51.chr16

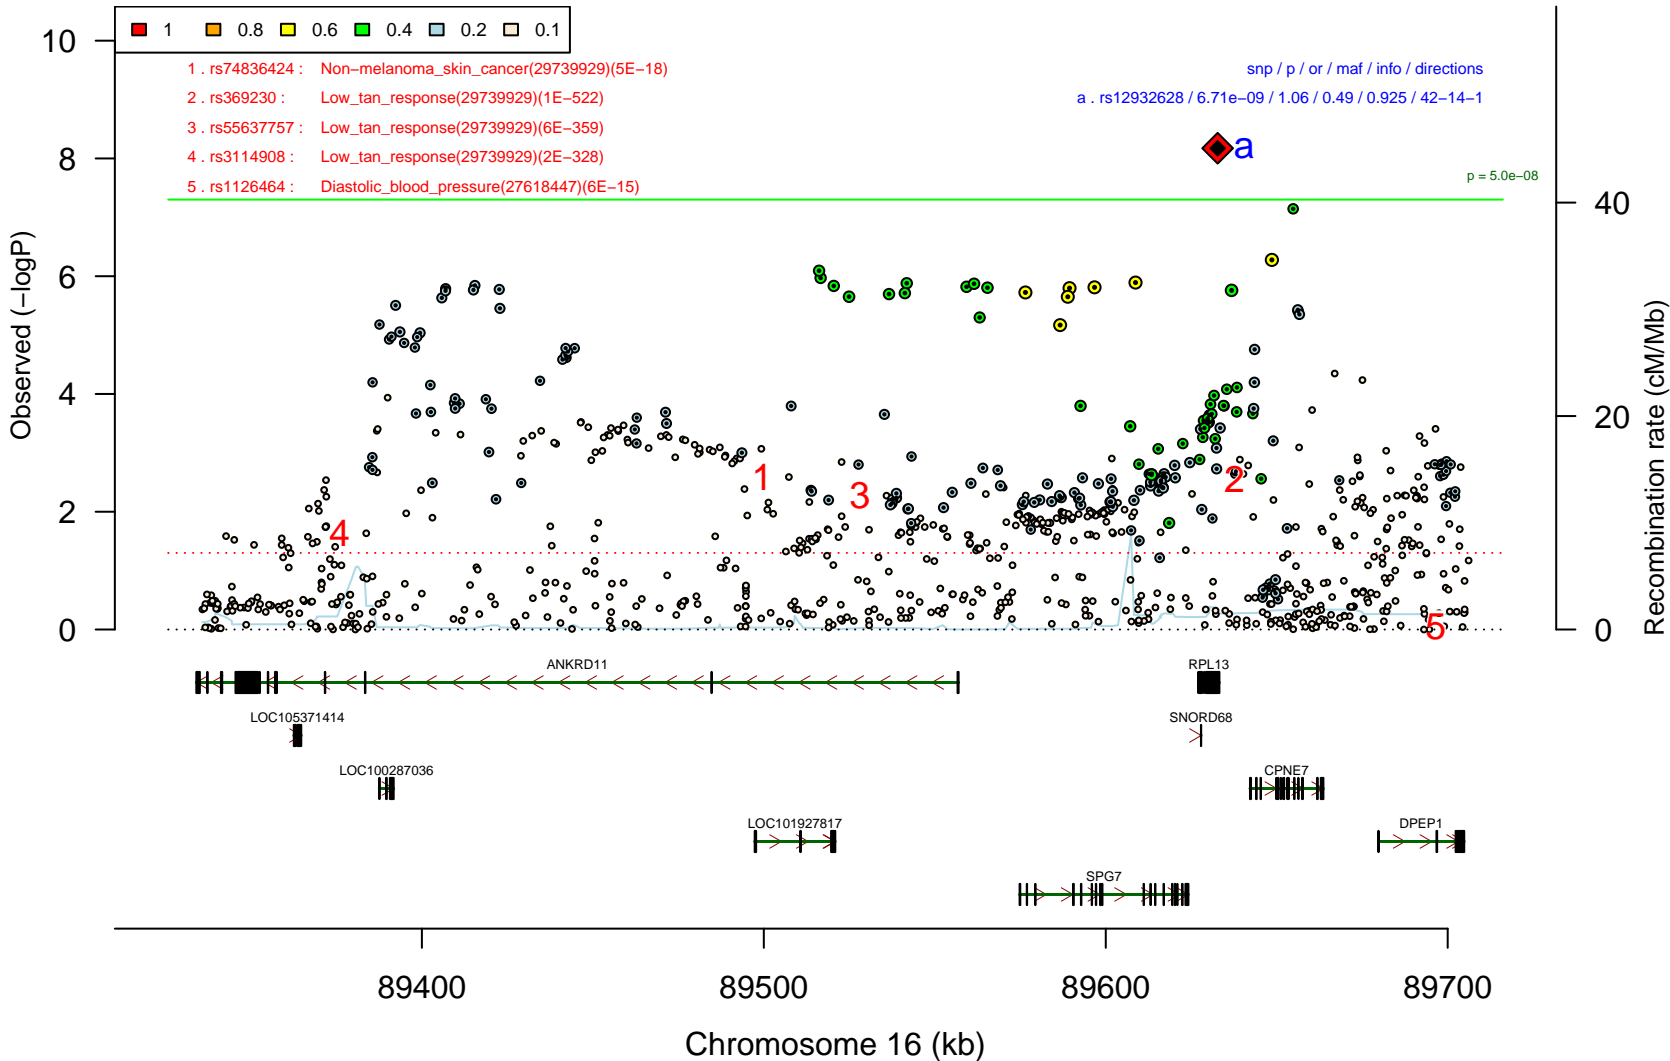

# bip\_pgc3.1.chr1

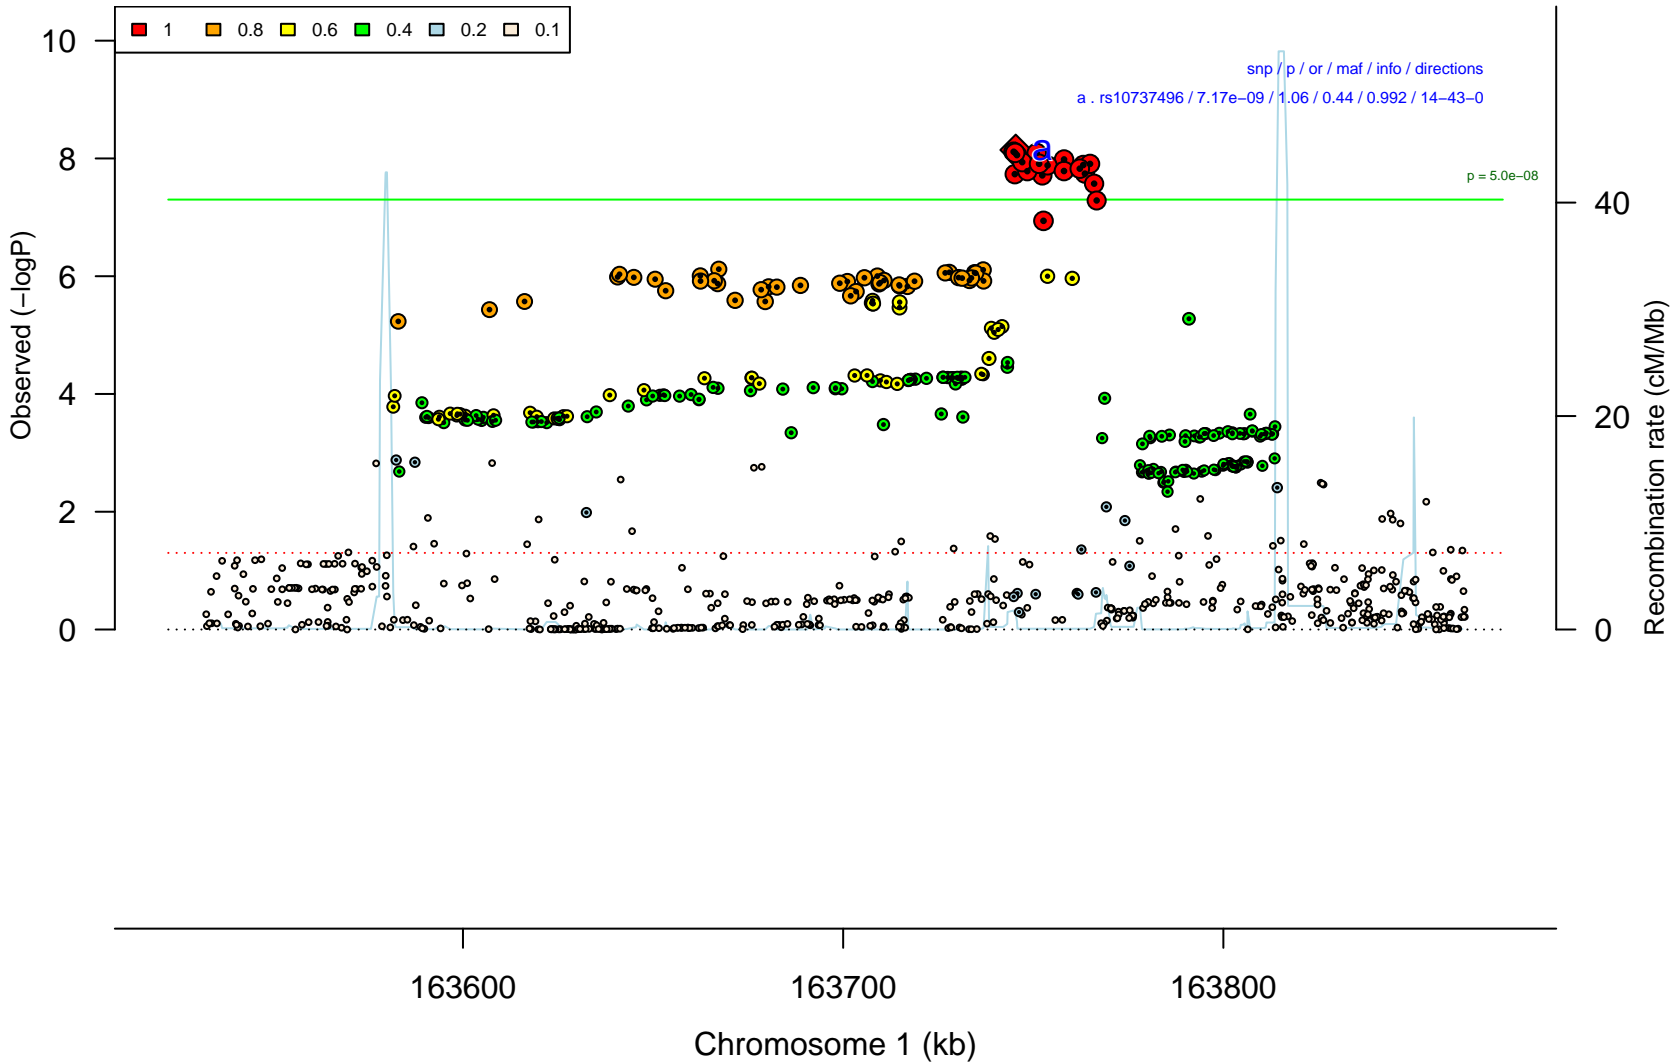

# bip\_pgc3.57.chr20

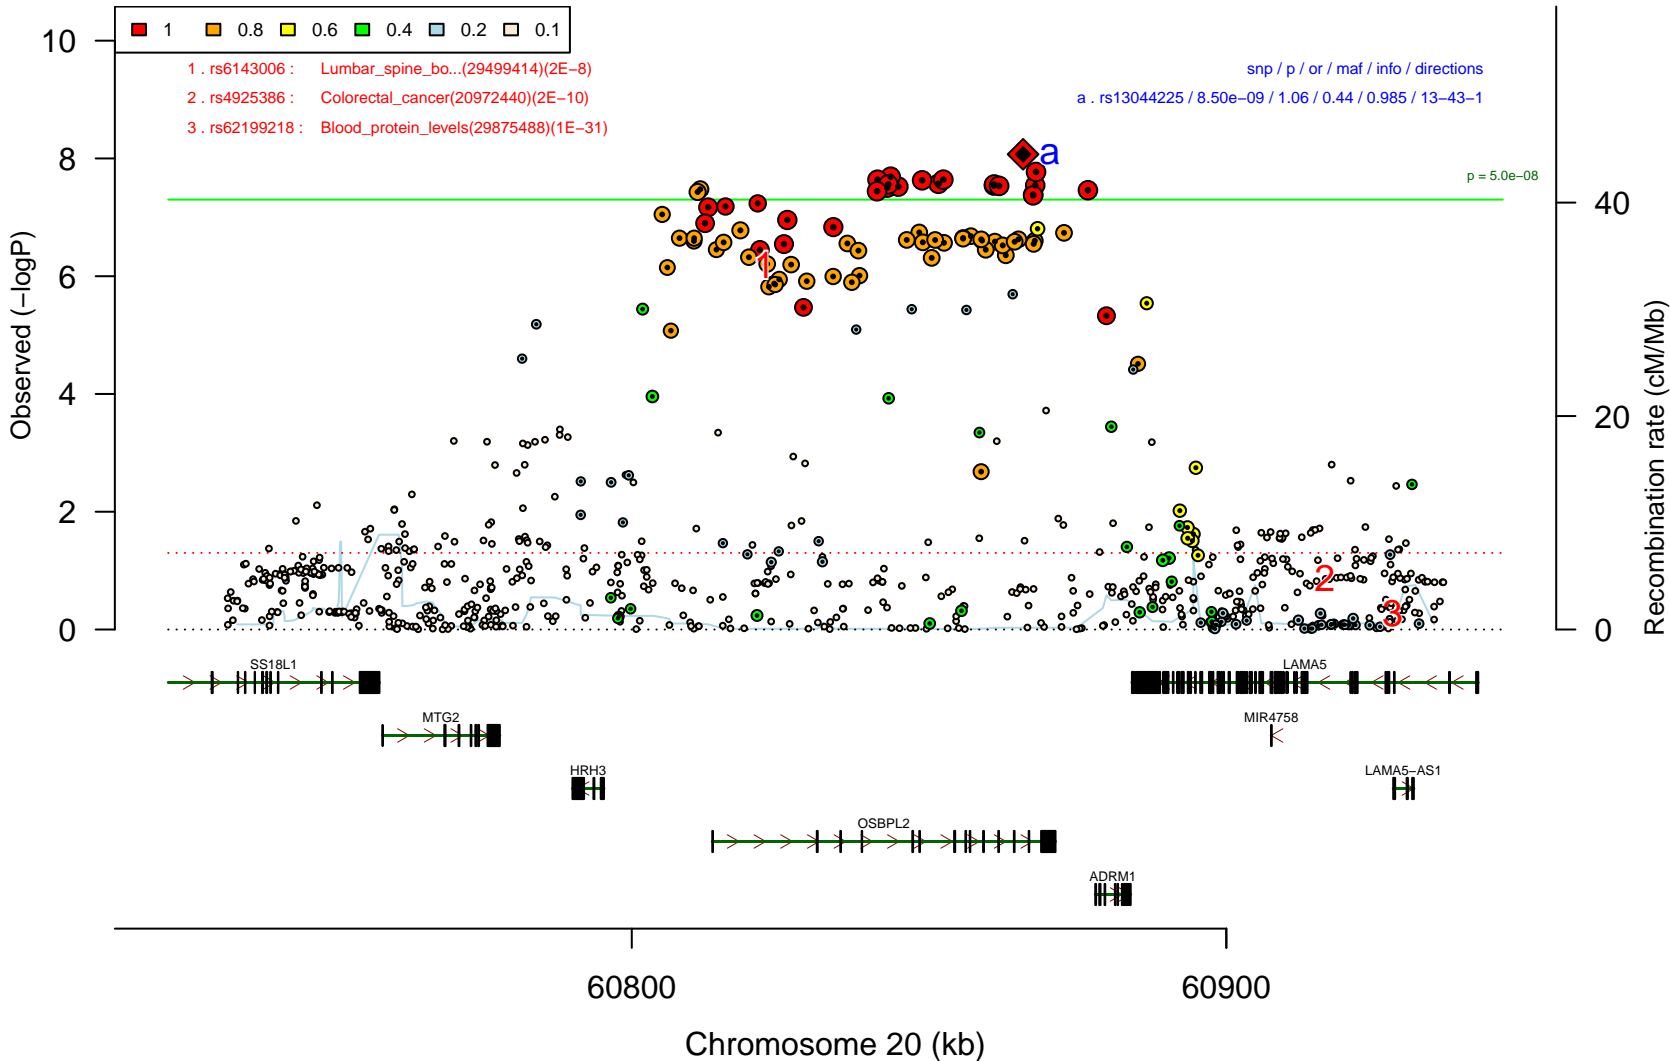

# bip\_pgc3.13.chr5

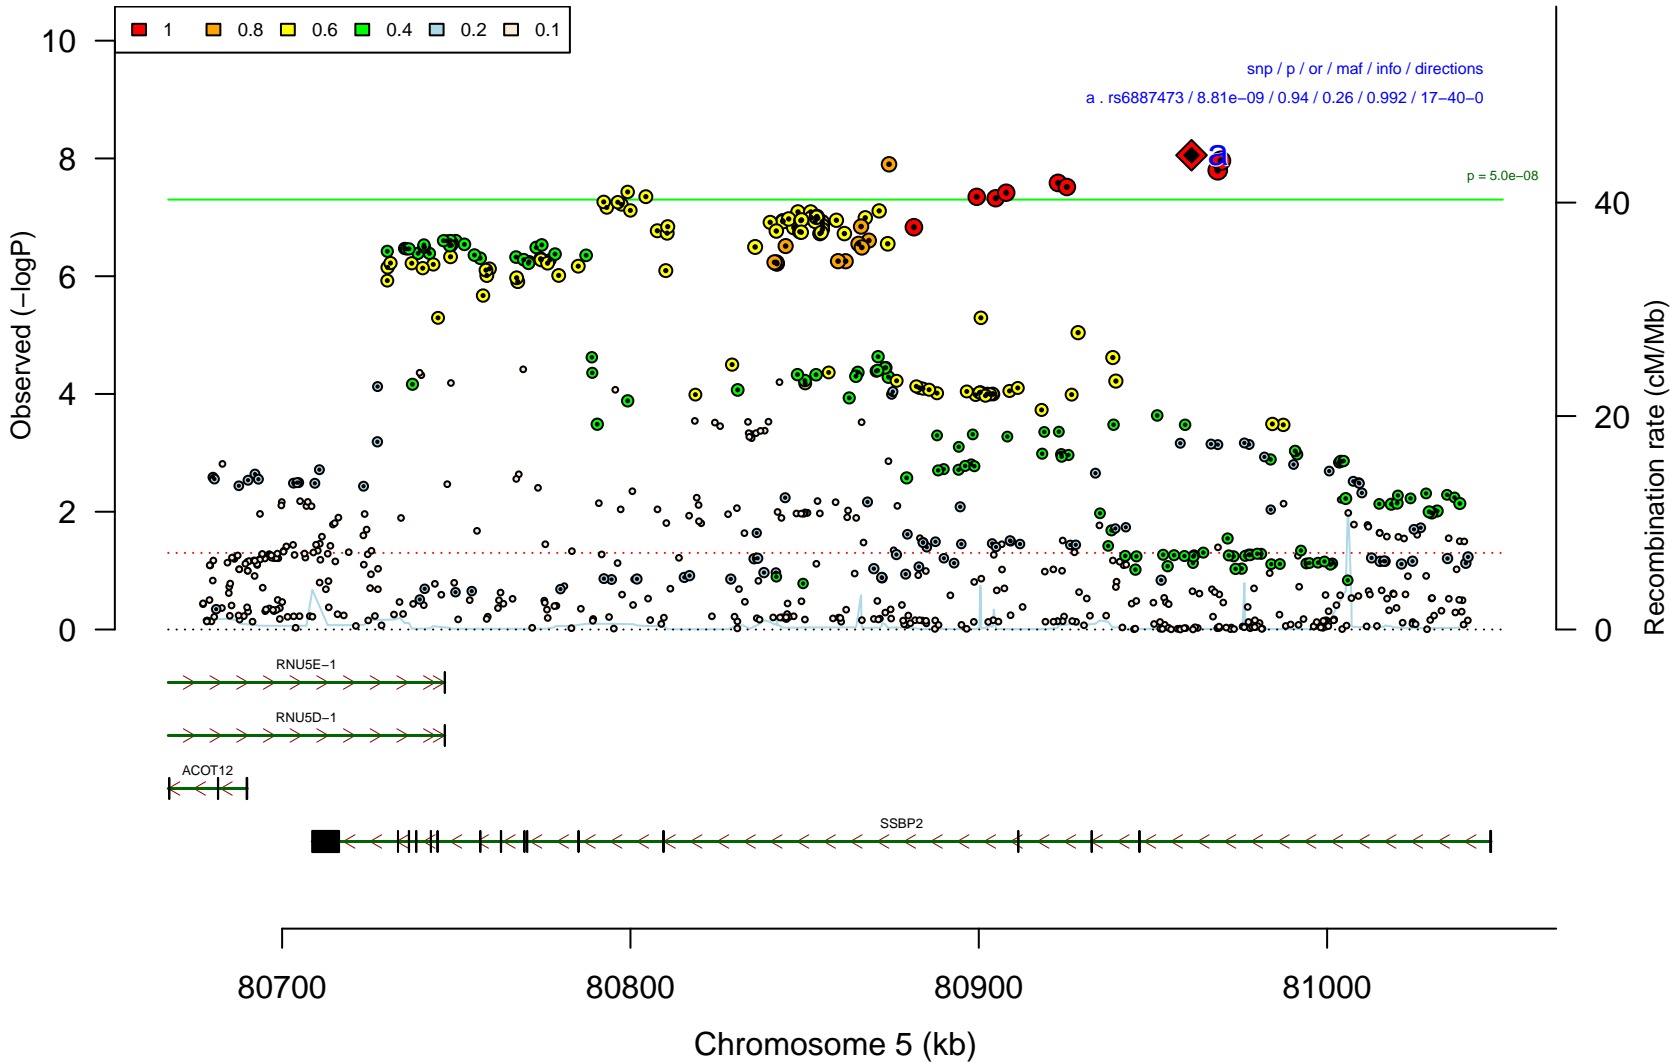

# bip\_pg3.46.chr15

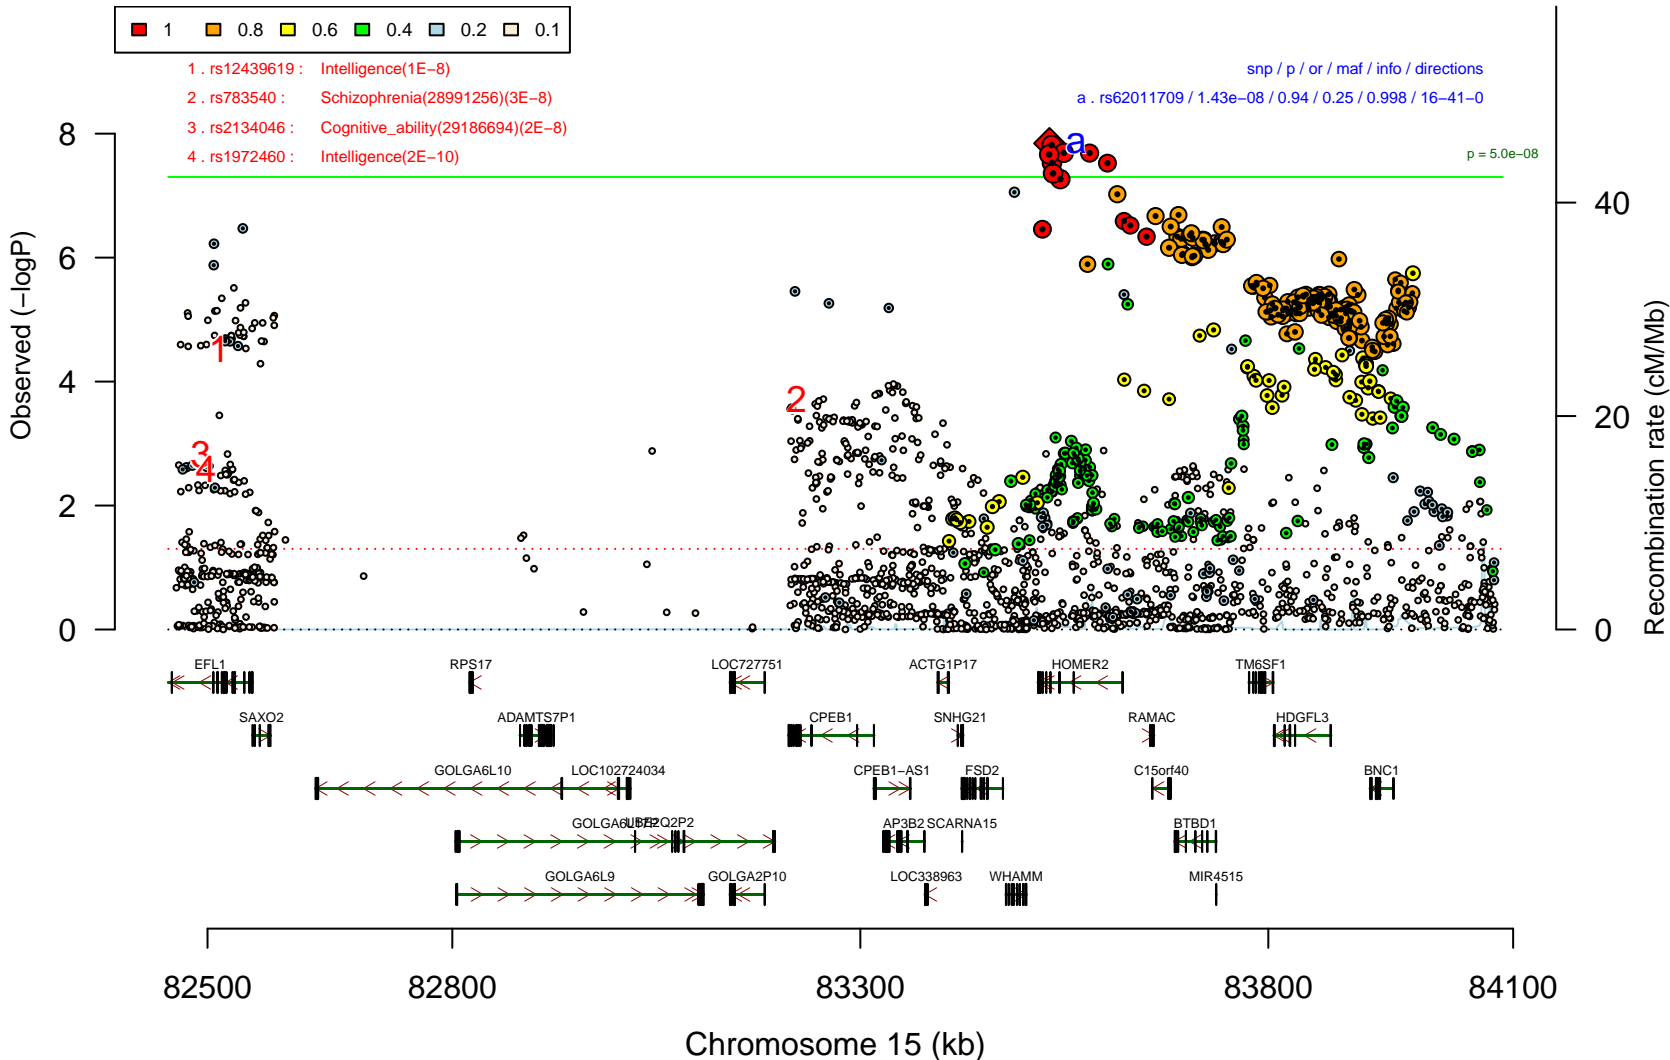

# bip\_pgc3.26.chr7

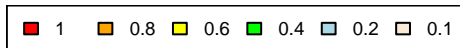

1 .rs9648716 : Type\_2\_diabetes(28869590)(1E-9)

snp / p / or / maf / info / directions

a .rs10255167 / 1.60e-08 / 0.94 / 0.22 / 0.993 / 44-12-1

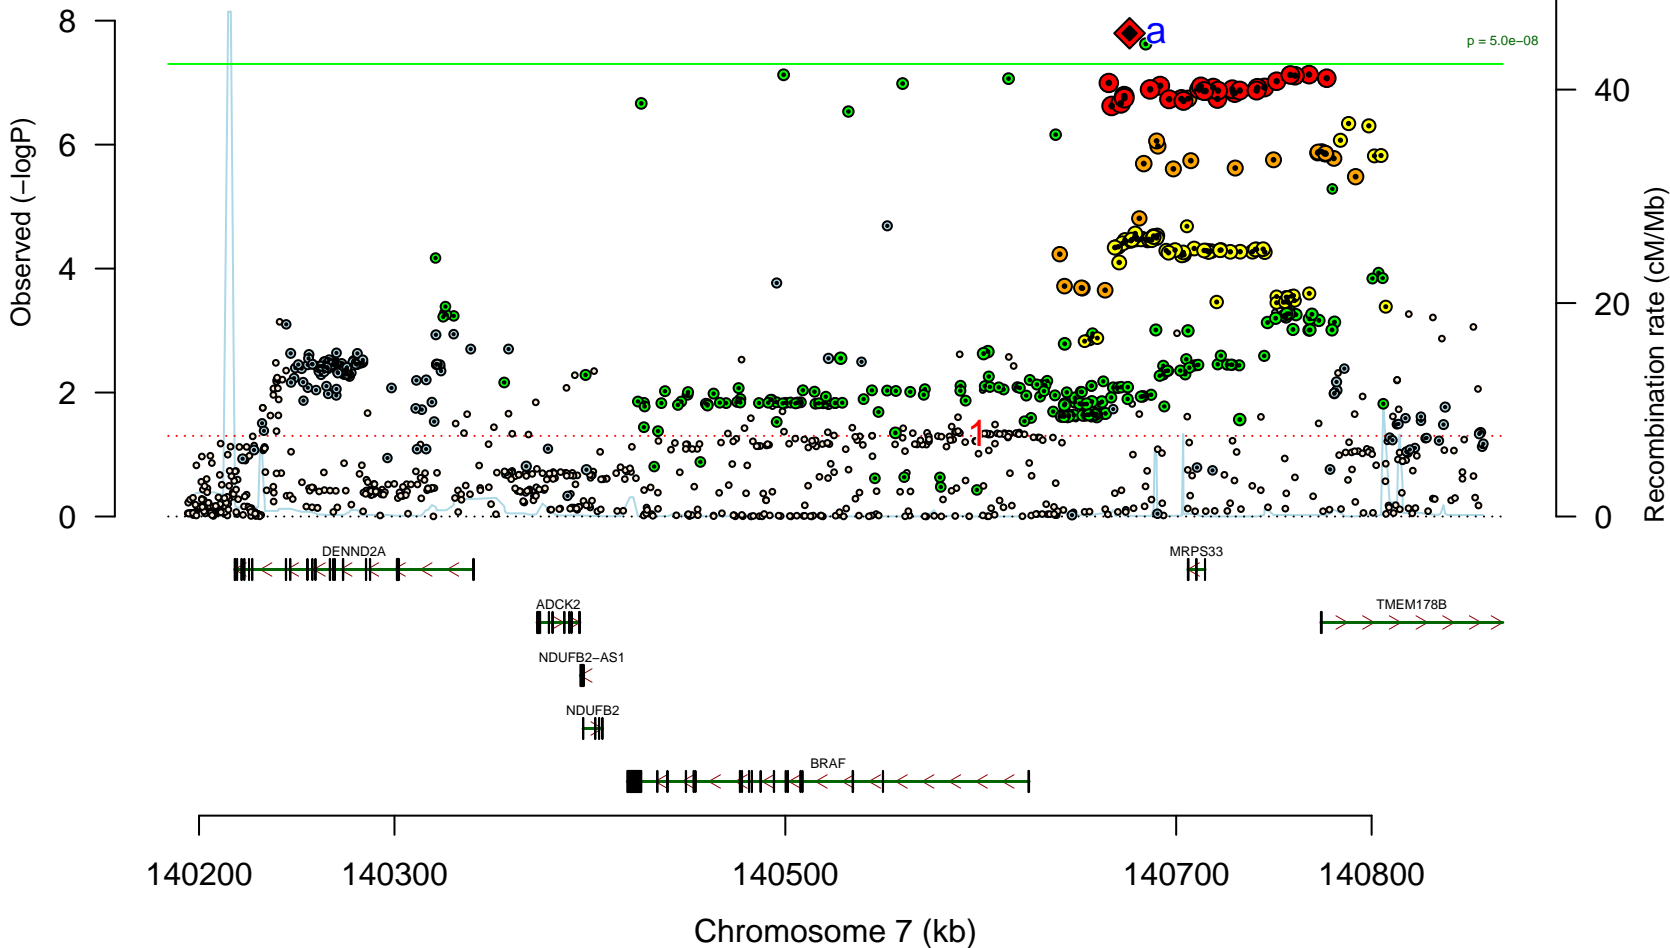

# bip\_pgc3.53.chr17

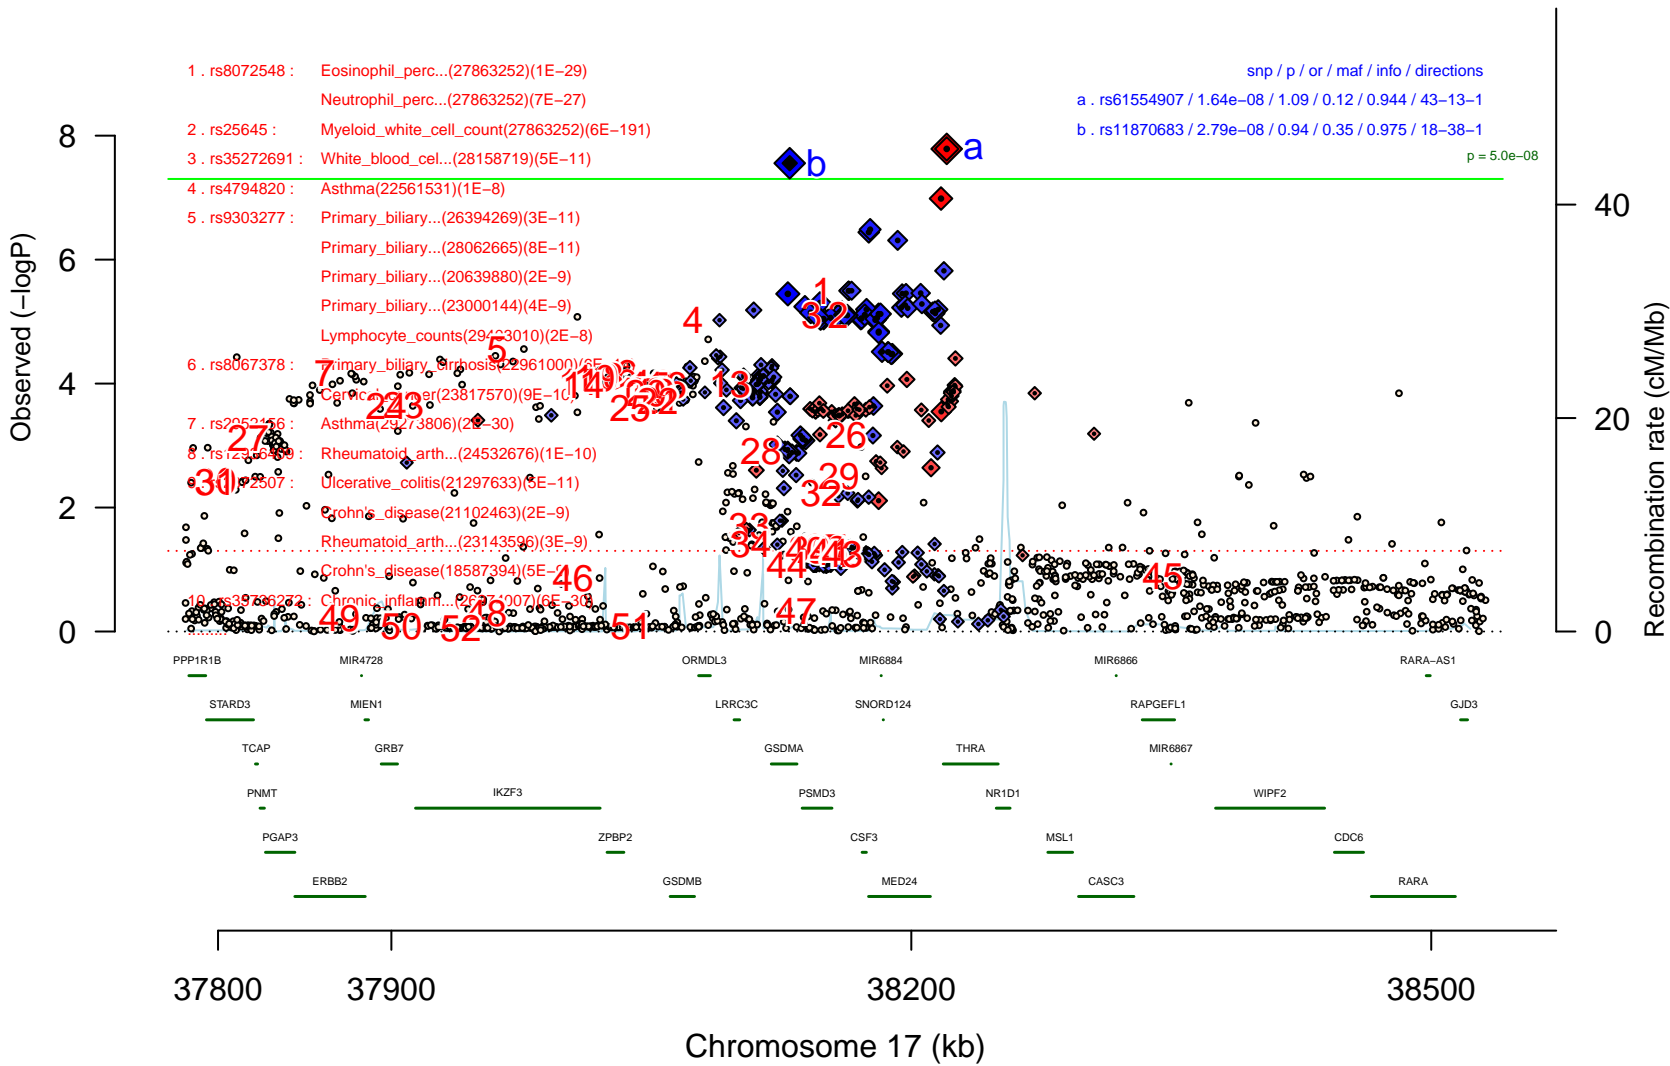



# bip\_pgc3.12.chr5

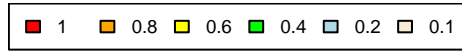

snp / p / or / maf / info / directions  
a . rs6865469 / 1.65e-08 / 1.06 / 0.27 / 0.996 / 40-17-0

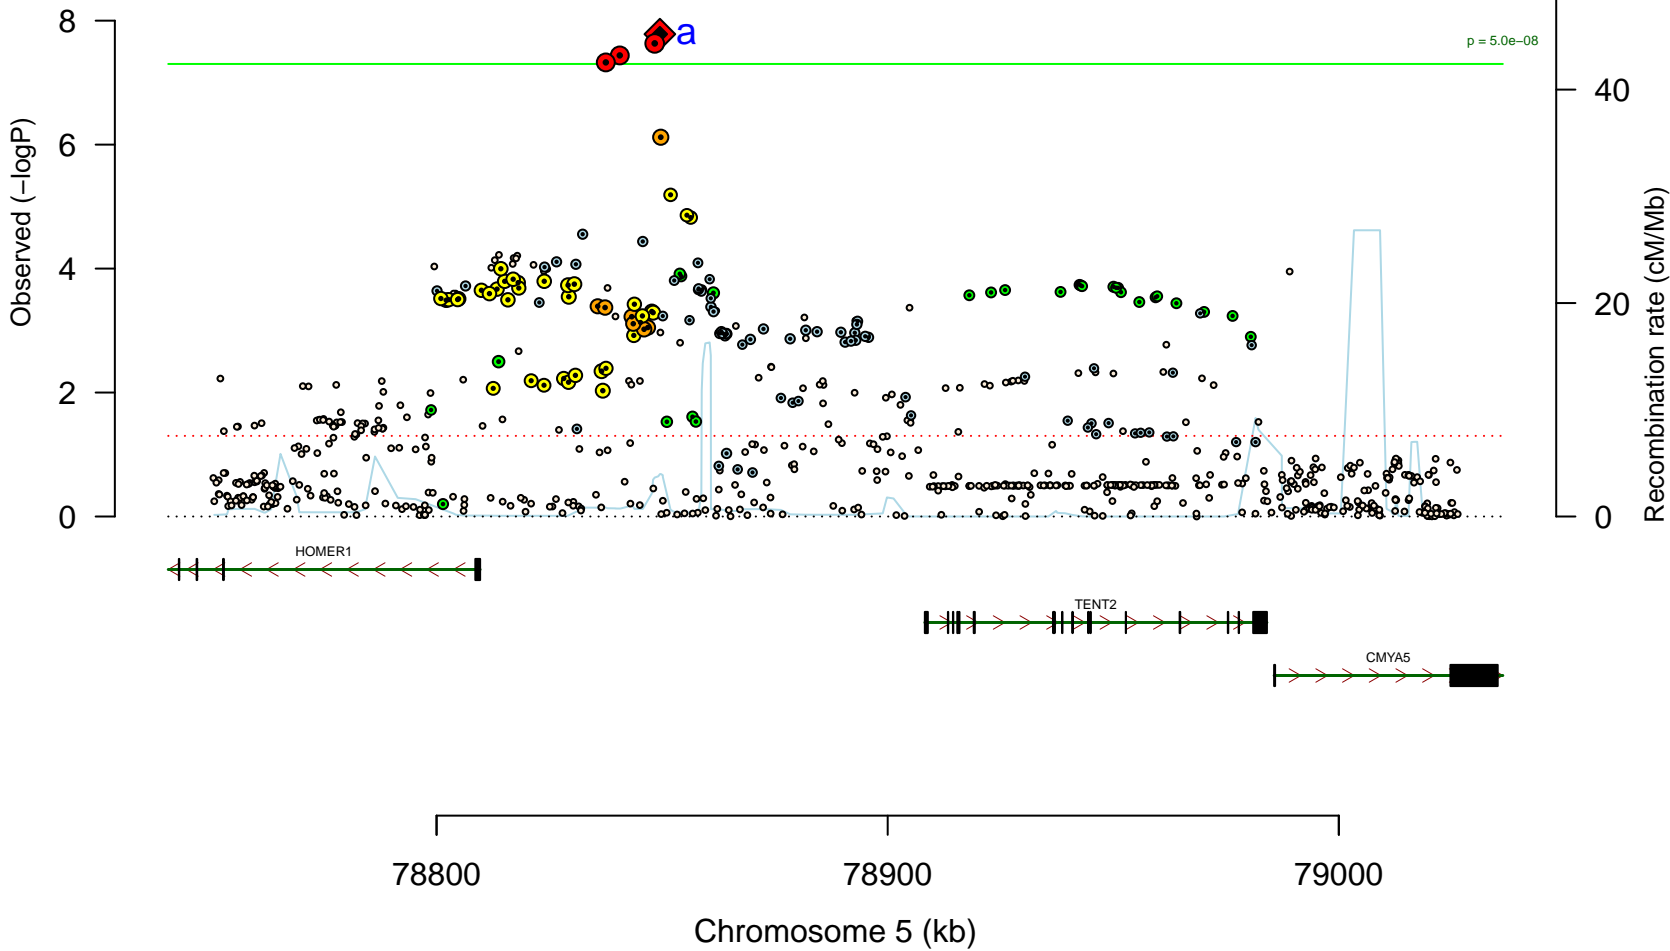

# bip\_pgc3.50.chr16

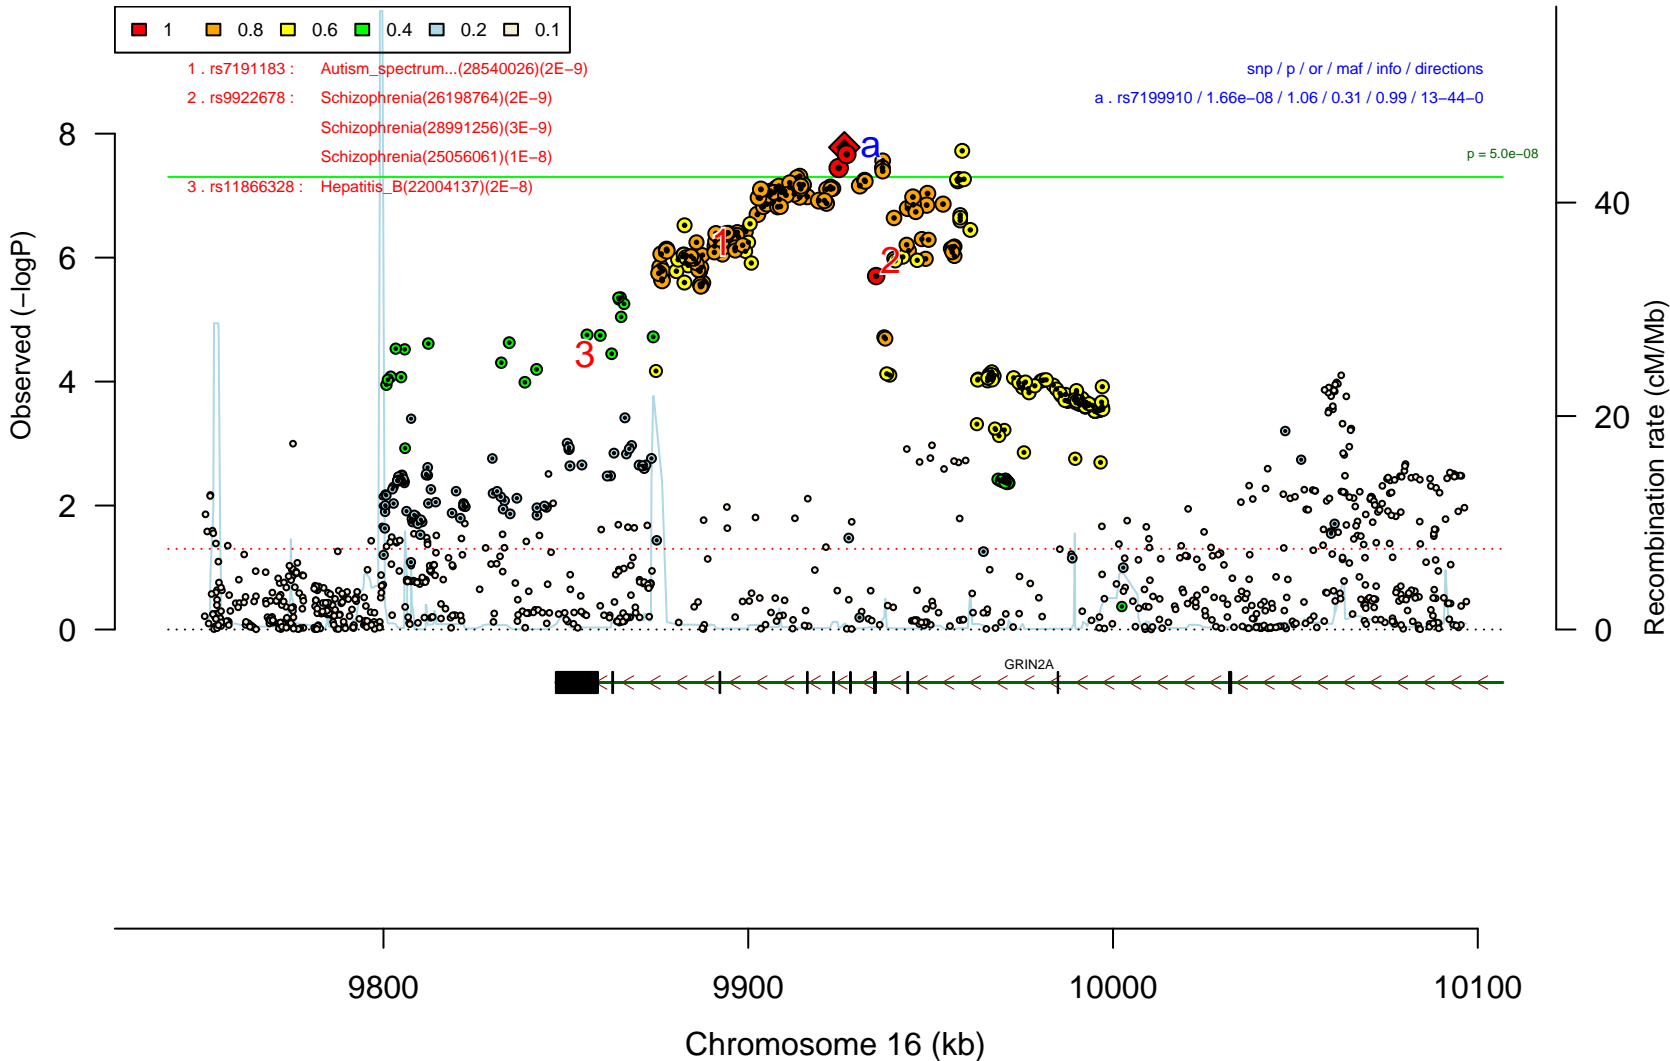

# bip\_pgc3.43.chr14

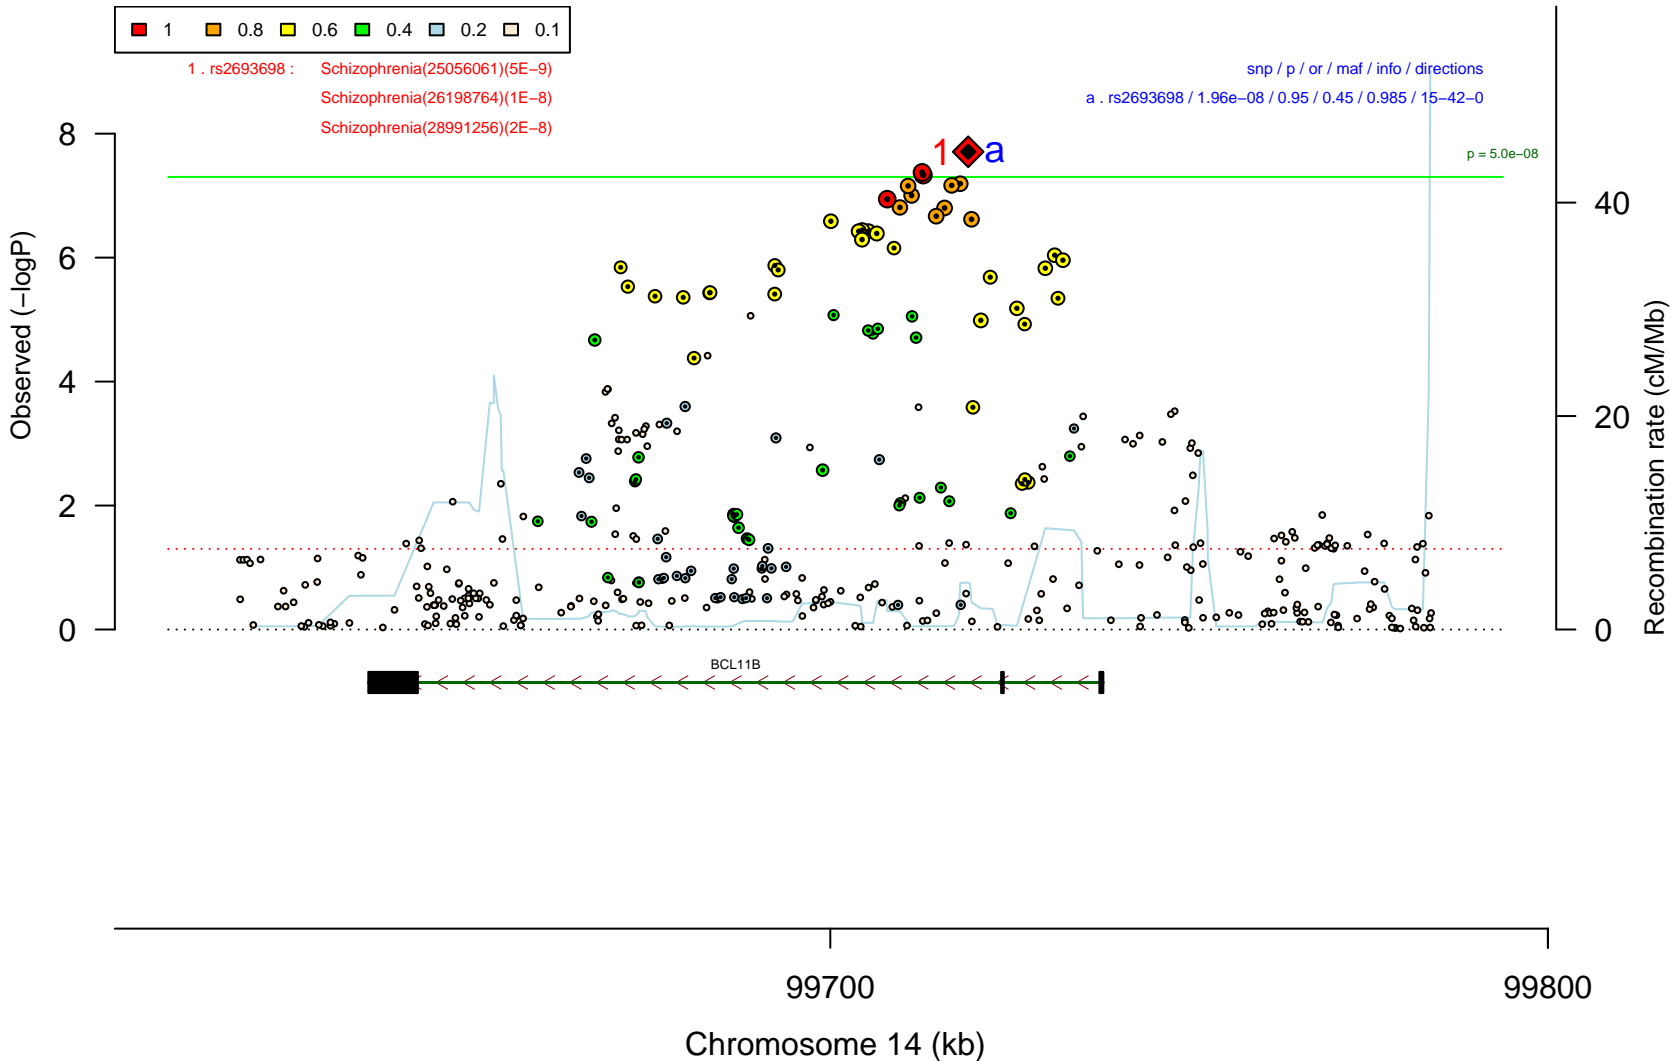

# bip\_ggc3.18.chr6

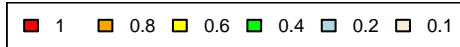

1 . rs9371601 : Autism\_spectrum...(23453885)(4E-9)  
2 . rs1203233 : Bipolar\_disorder(28072414)(4E-8)

snp / p / or / maf / info / directions  
a . rs4331993 / 1.98e-08 / 1.06 / 0.38 / 1.000 / 43-13-1

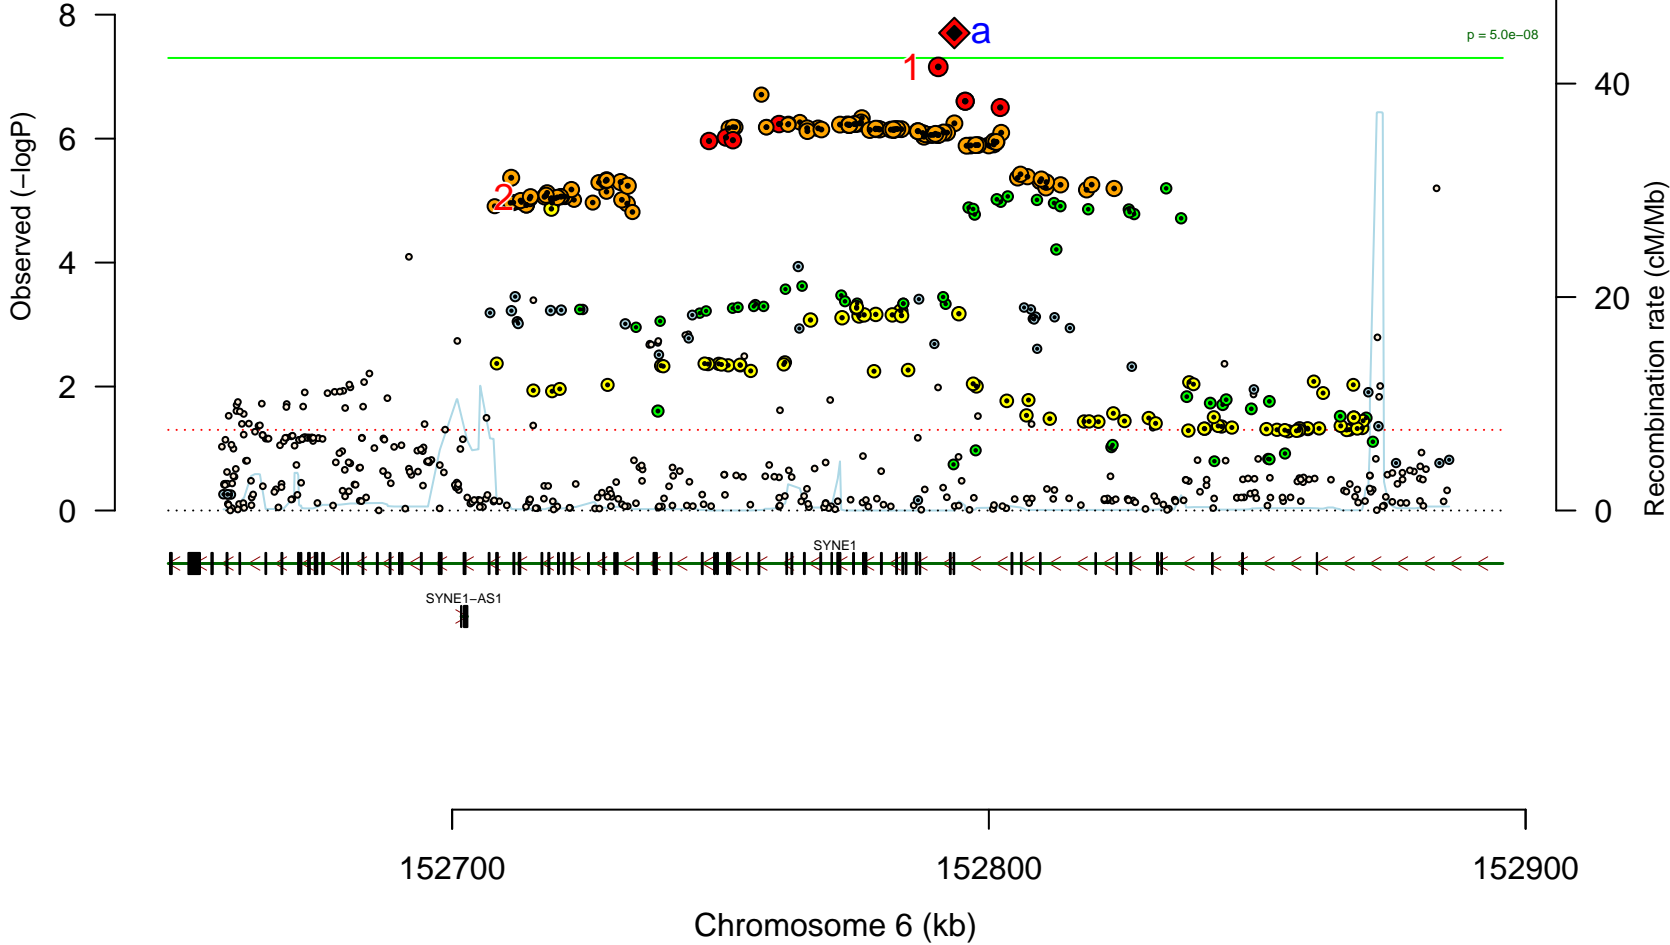



# bip\_pgc3.4.chr2

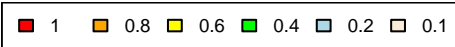

1 . rs183034862 : Red\_cell\_distri...(27863252)(5E-14)

snp / p / or / maf / info / directions  
a . rs13417268 / 2.05e-08 / 0.94 / 0.24 / 0.99 / 47-10-0

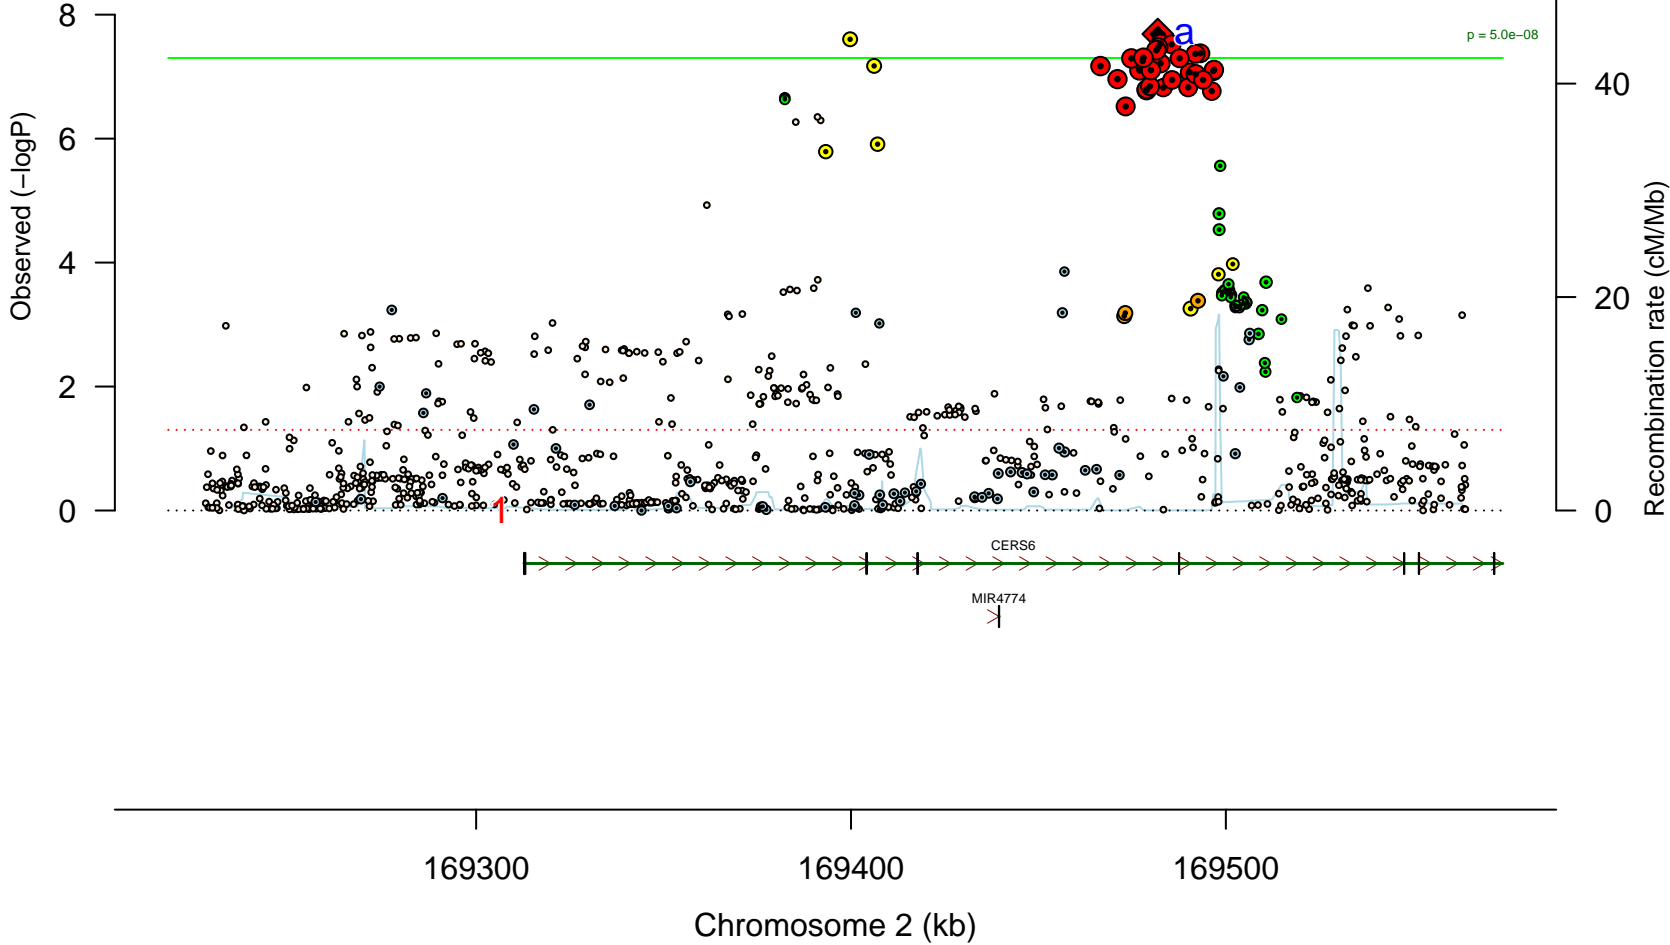

# bip\_pgc3.8.chr3

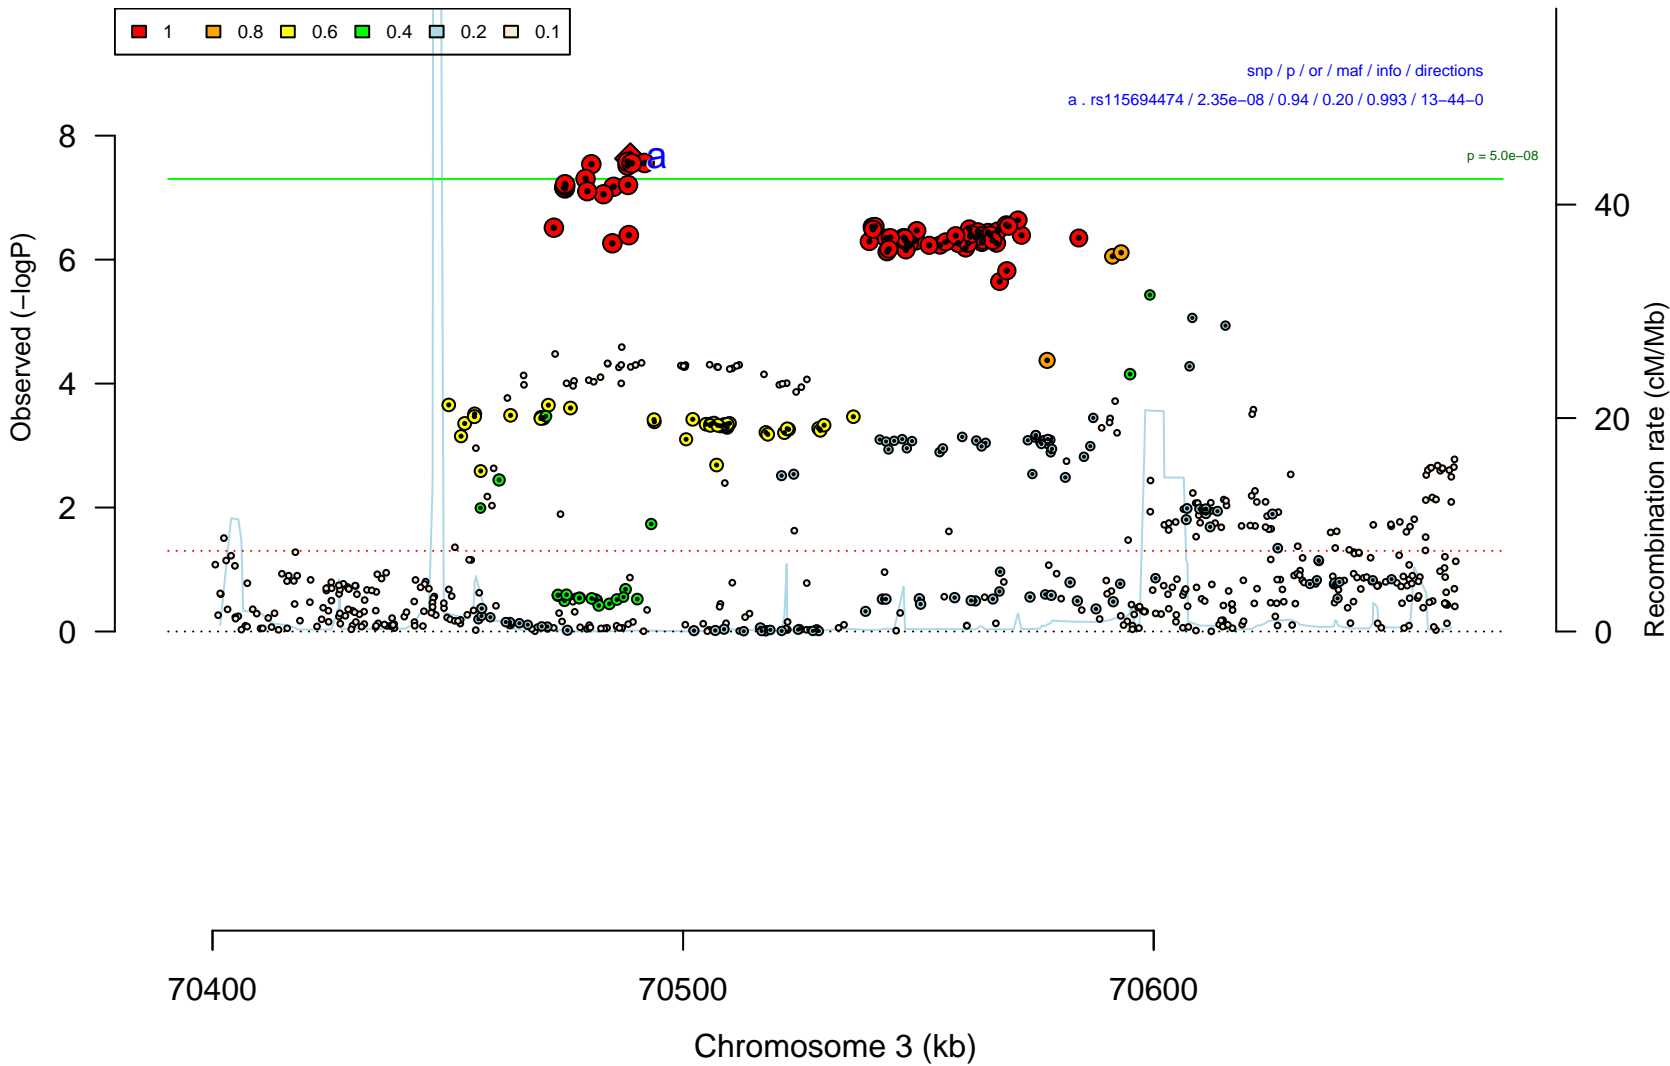

# bip\_pgc3.30.chr9

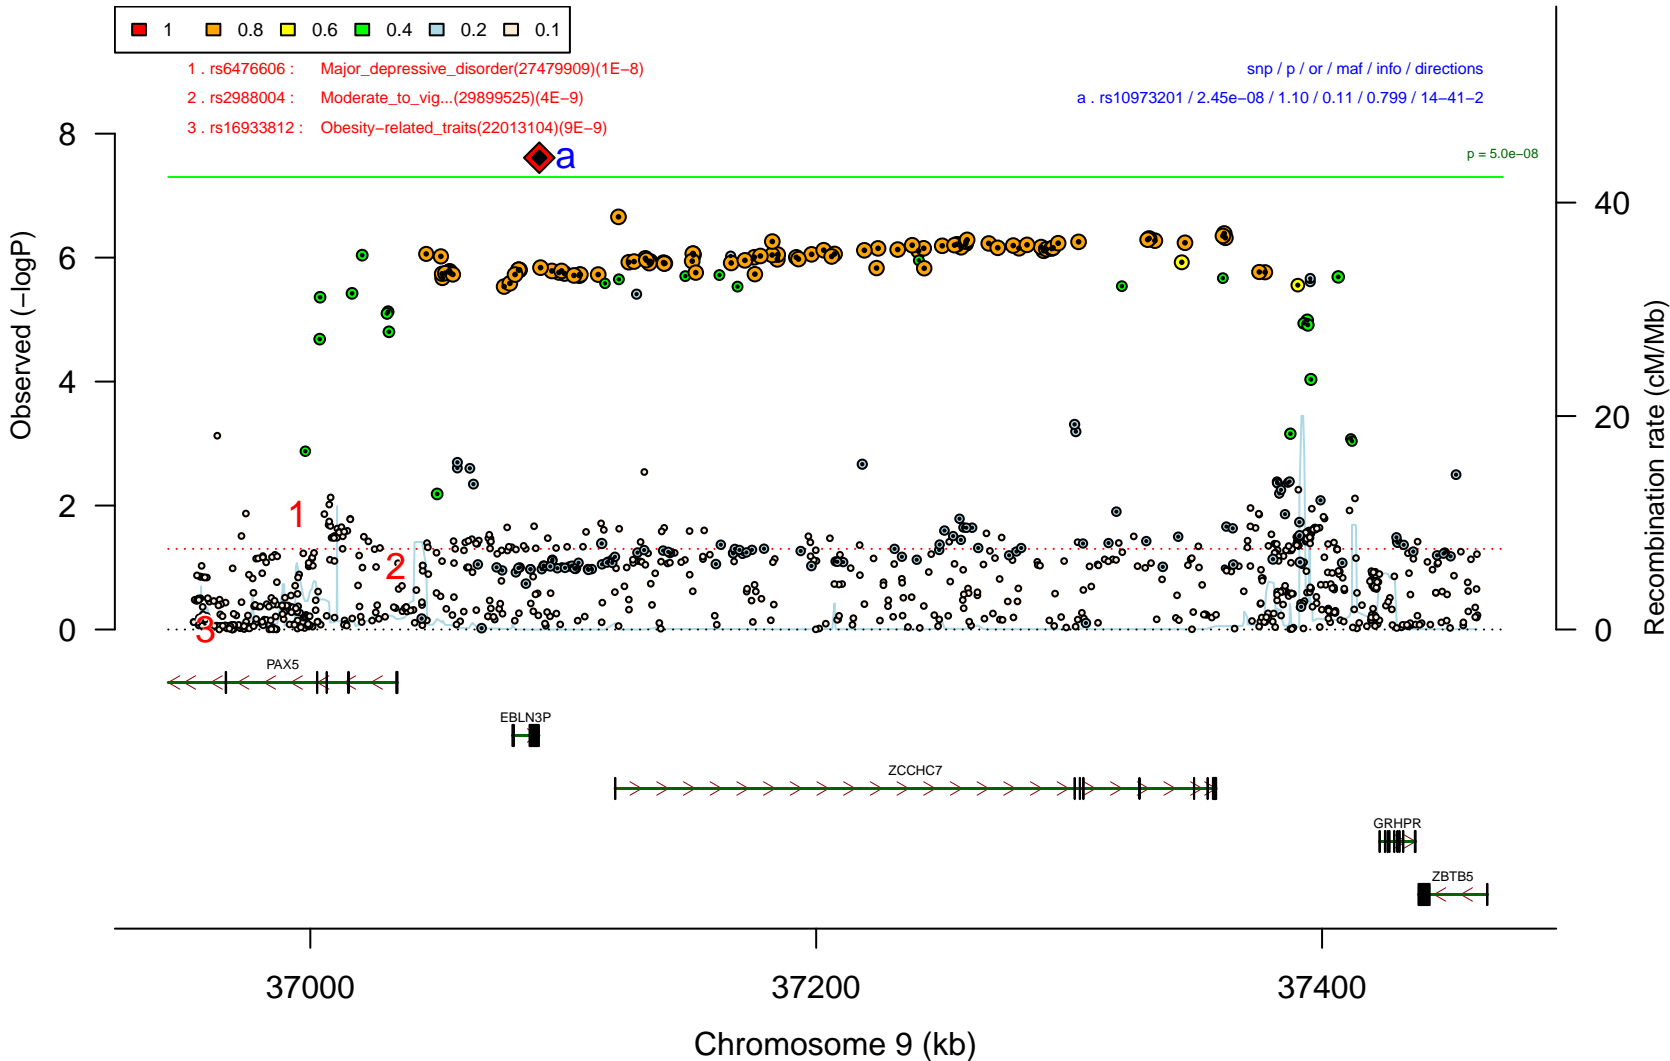



# bip\_pgc3.3.chr2

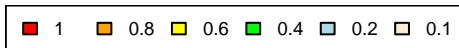

1 . rs353116 : Parkinson's\_disease(28892059)(3E-8)  
2 . rs3769955 : Febrile\_seizures(25344690)(3E-10)

snp / p / or / maf / info / directions  
a . rs17183814 / 2.68e-08 / 0.90 / 0.08 / 0.978 / 11-44-2

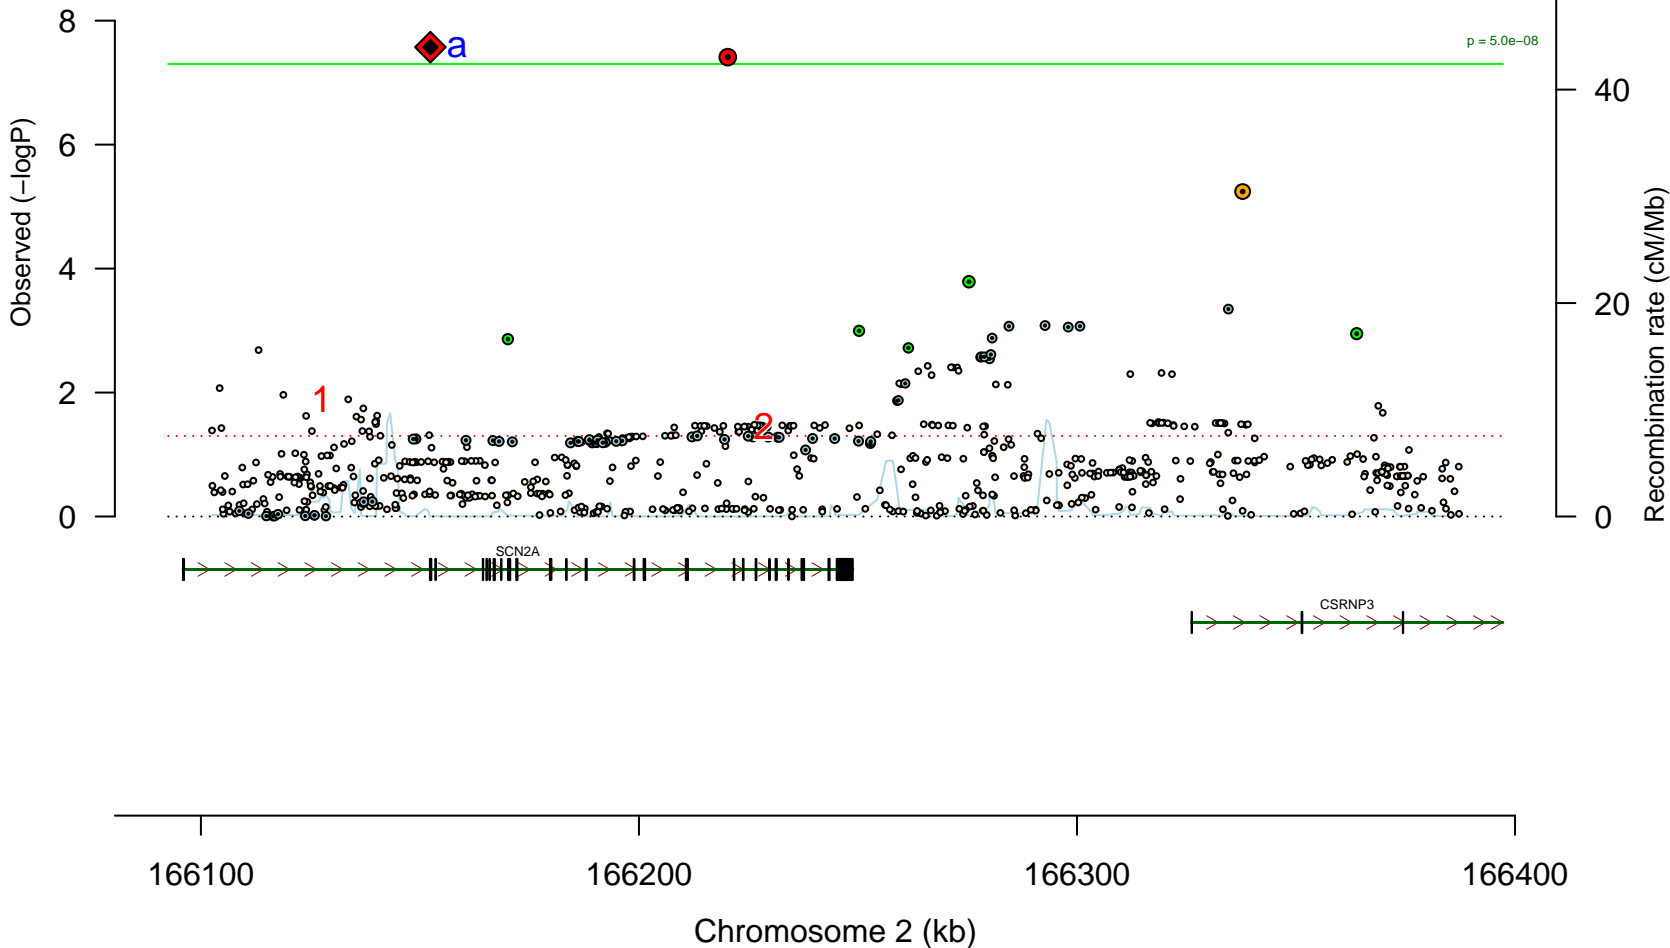

# bip\_pgc3.31.chr9

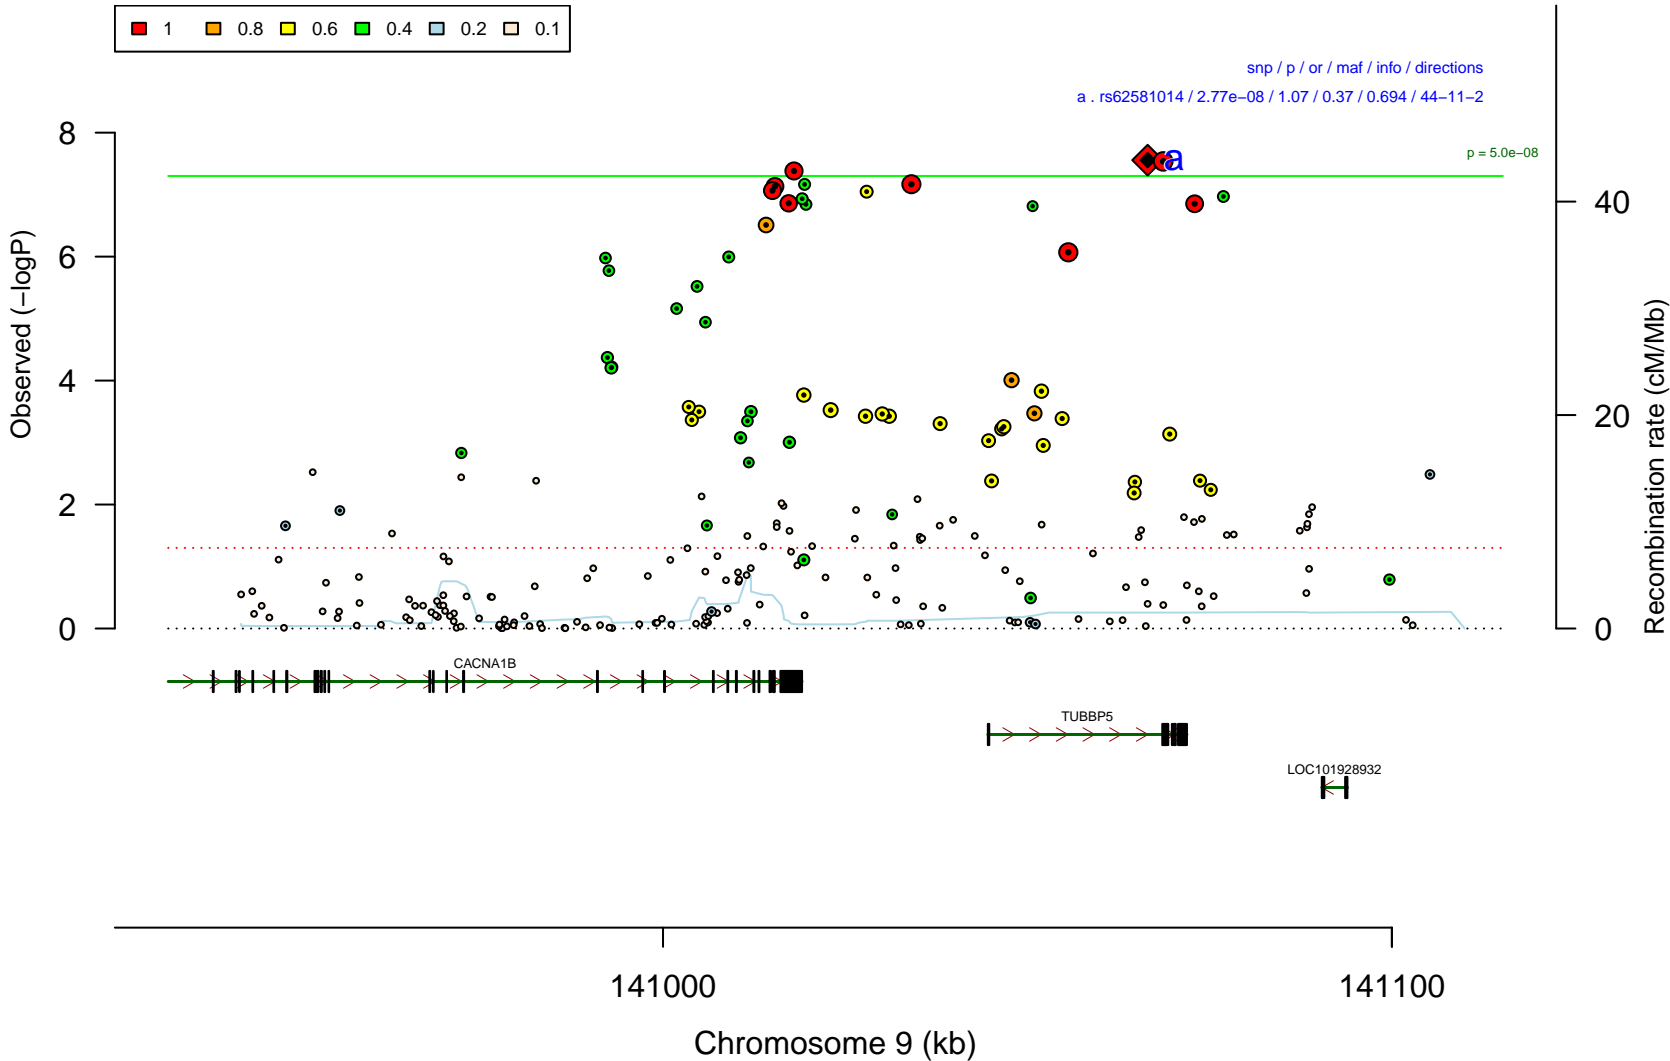

# bip\_pgc3.52.chr17

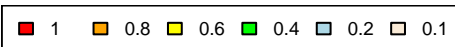

1 . rs5030755 : Mean\_corpuscular\_volume(27863252)(9E-11)

snp / p / or / maf / info / directions

a . rs4790841 / 3.14e-08 / 1.08 / 0.15 / 0.937 / 43-13-1

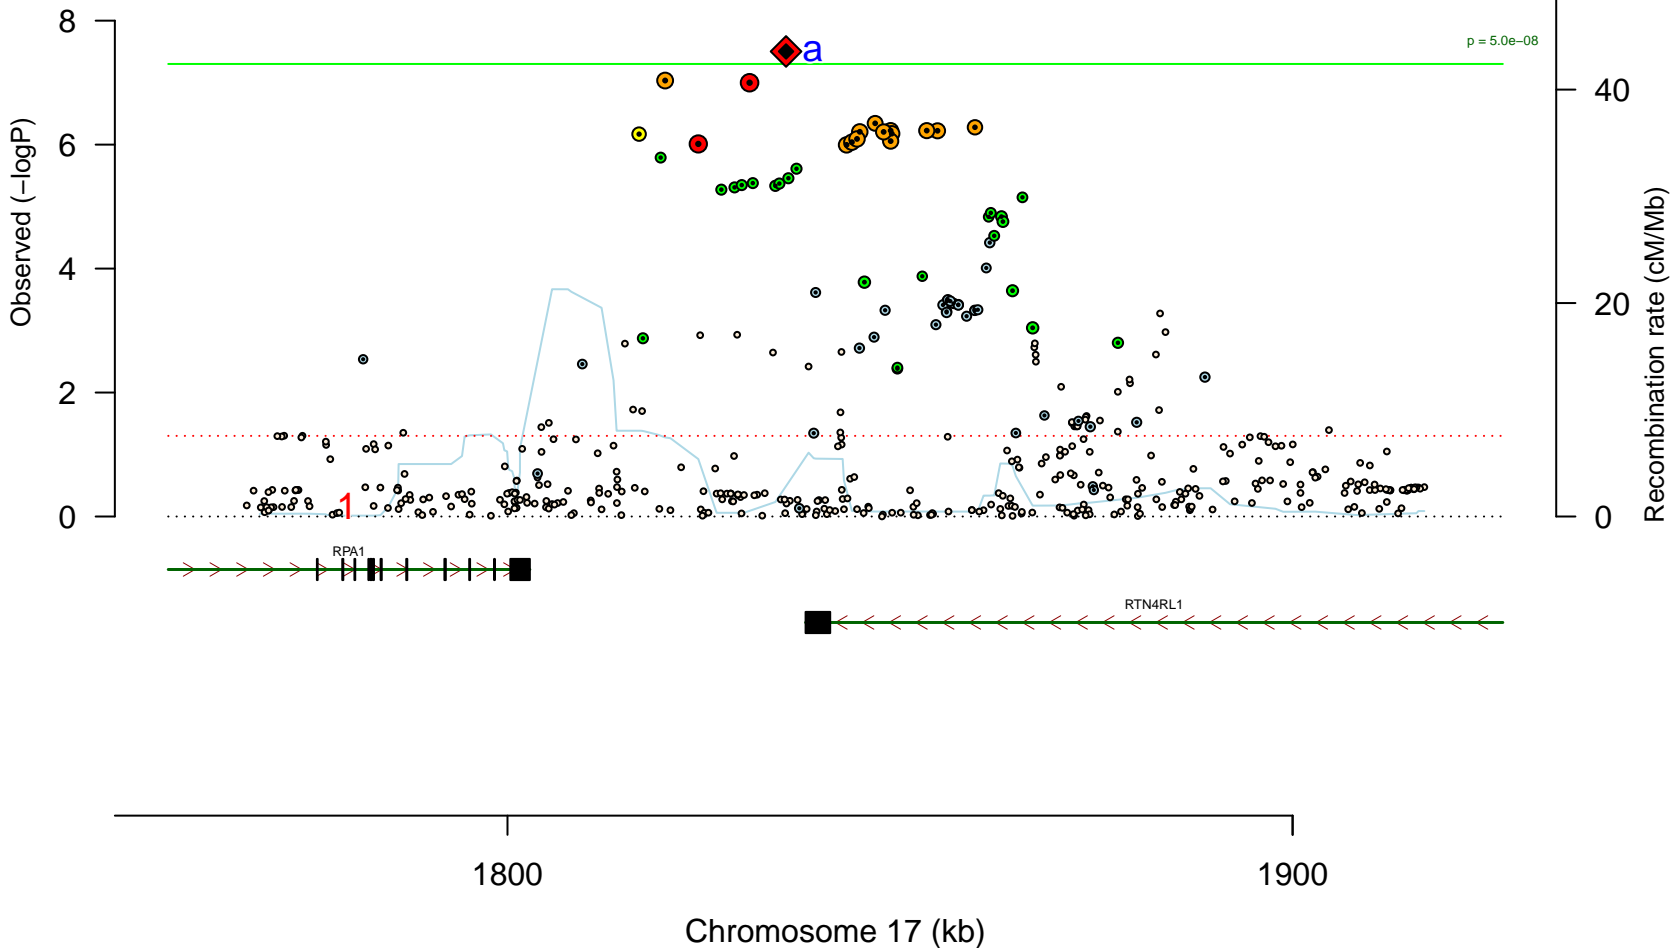

# bip\_pgc3.40.chr11

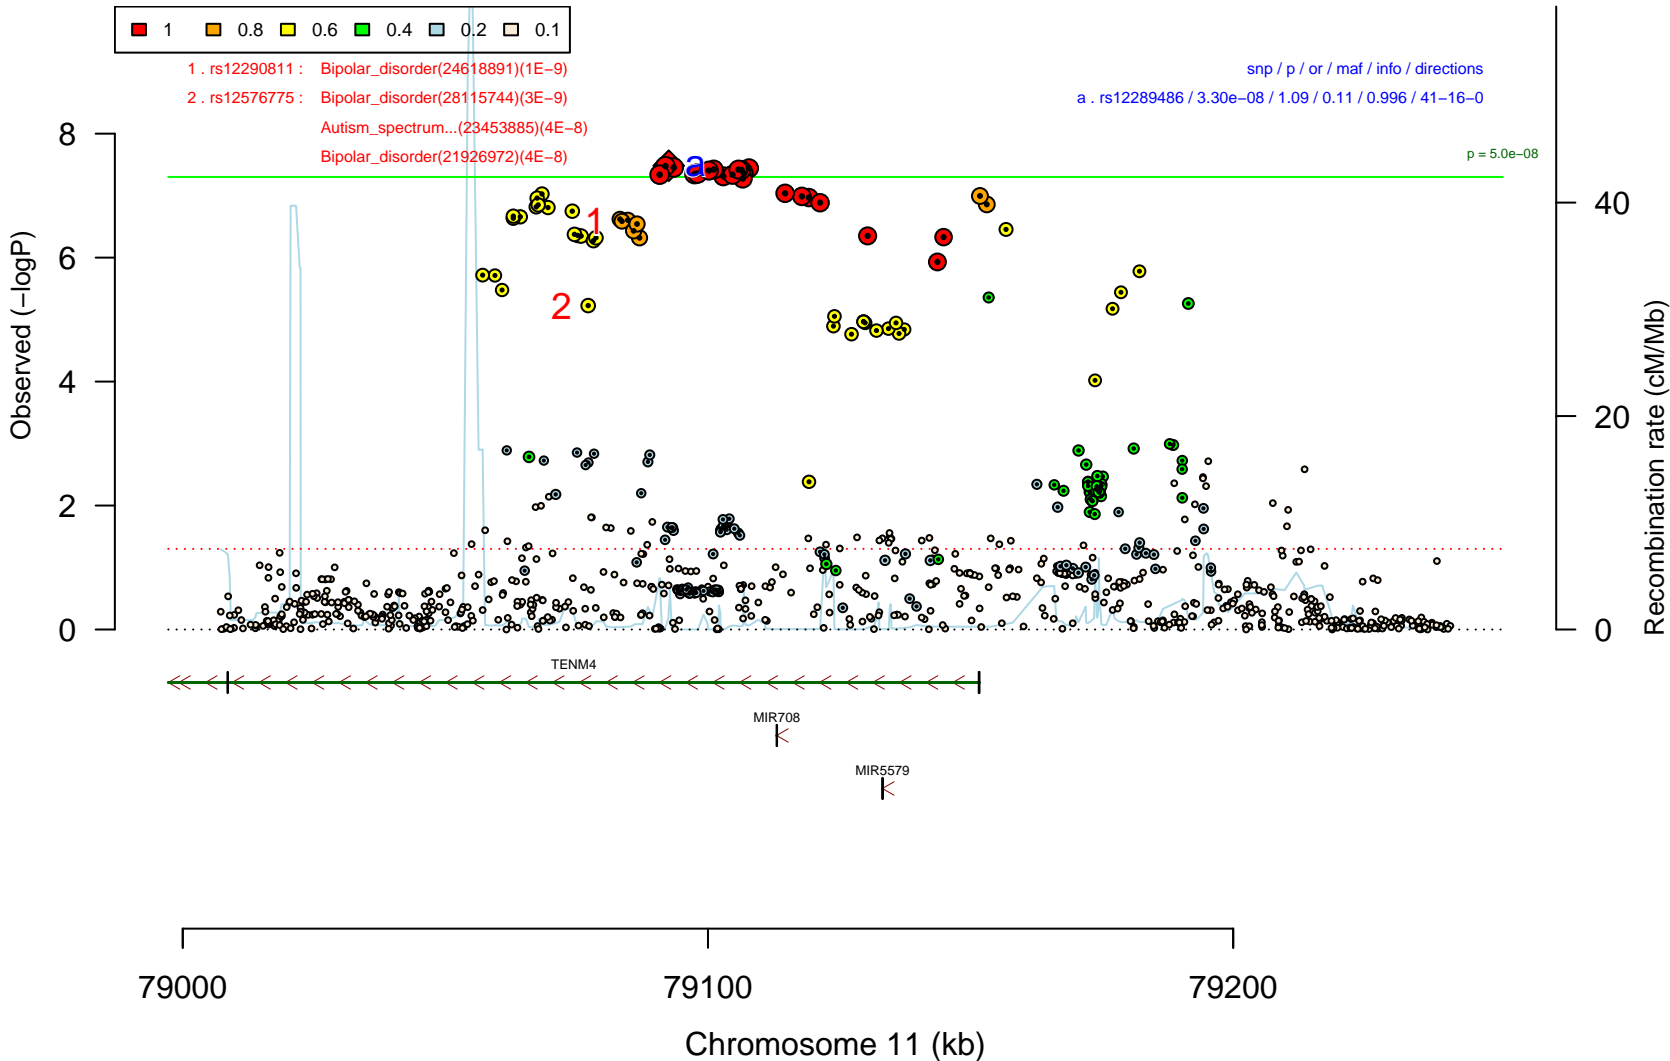

# bip\_ggc3.25.chr7

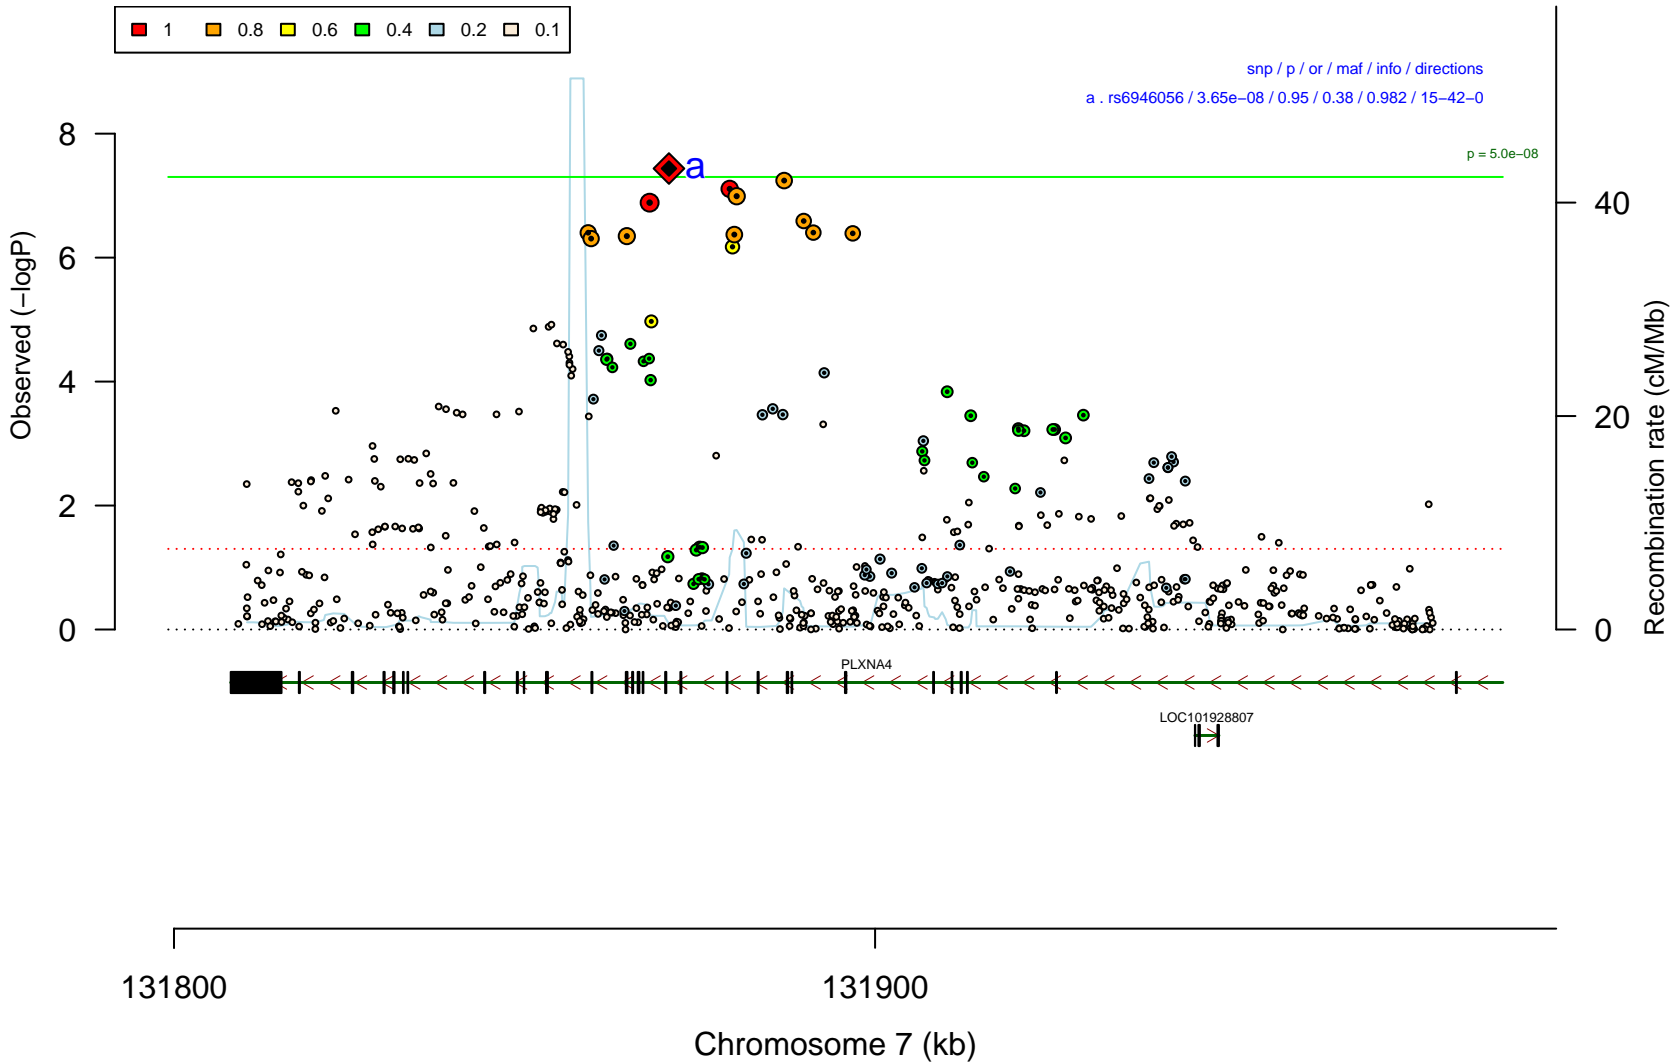

# bip\_pgc3.14.chr5

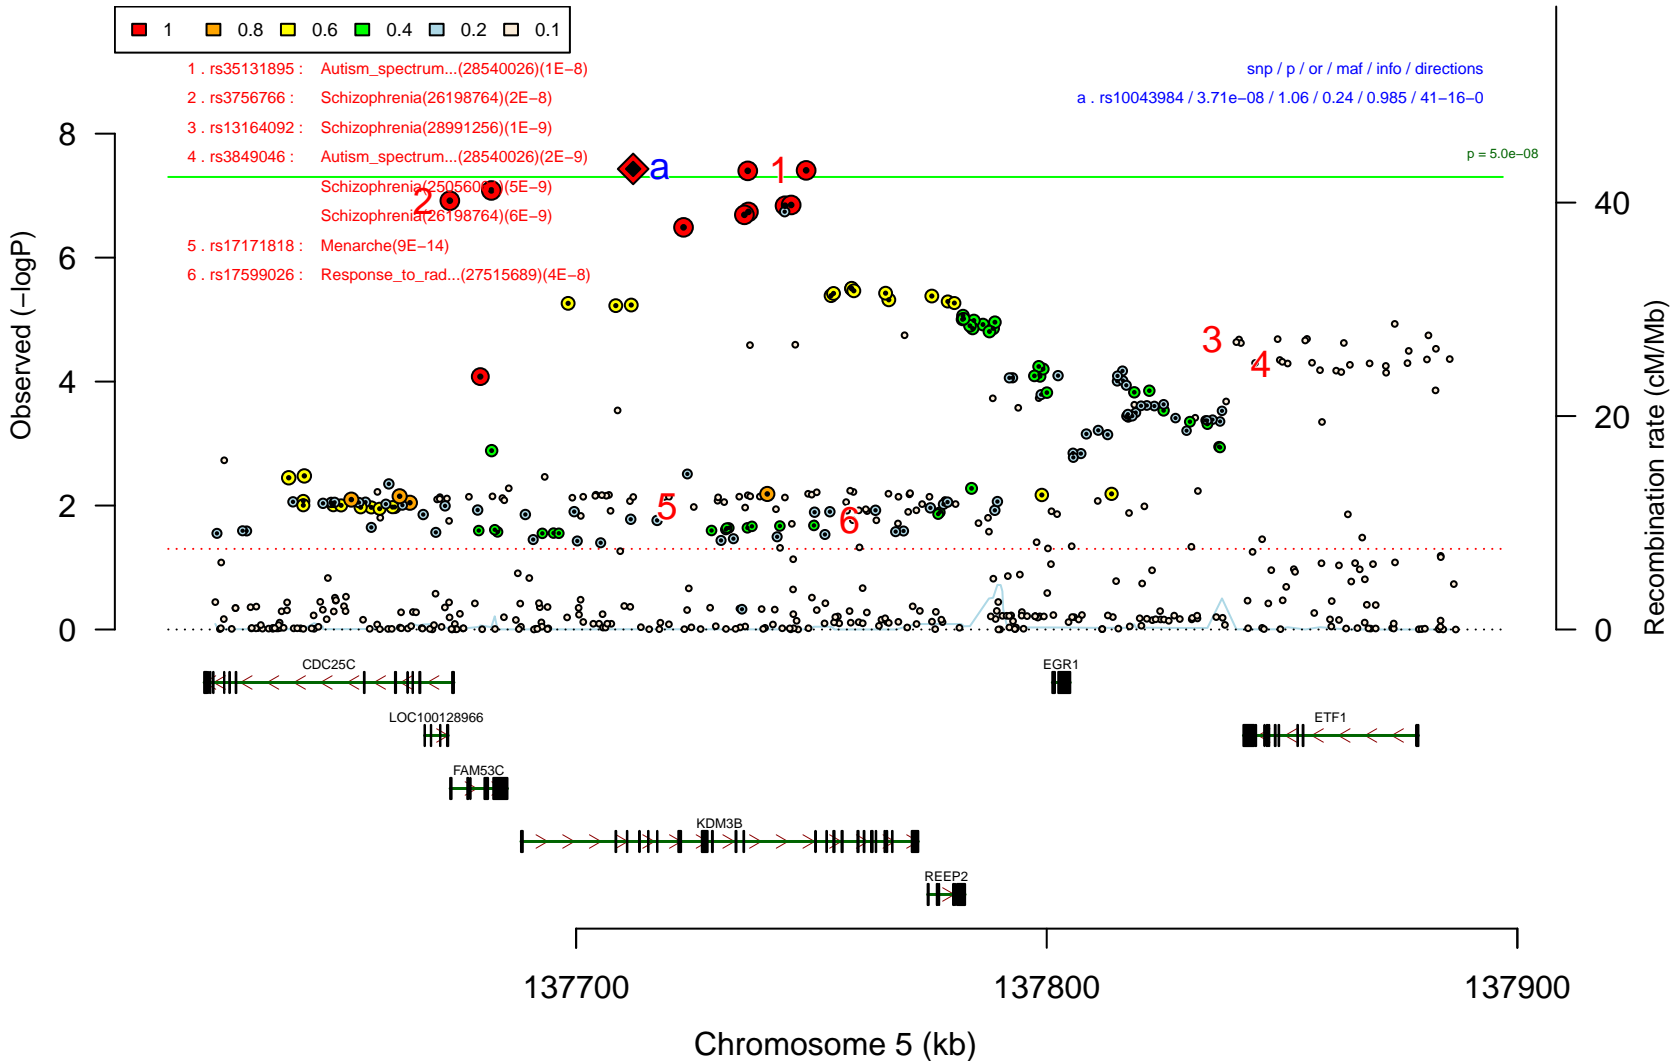

# bip\_pgc3.44.chr15

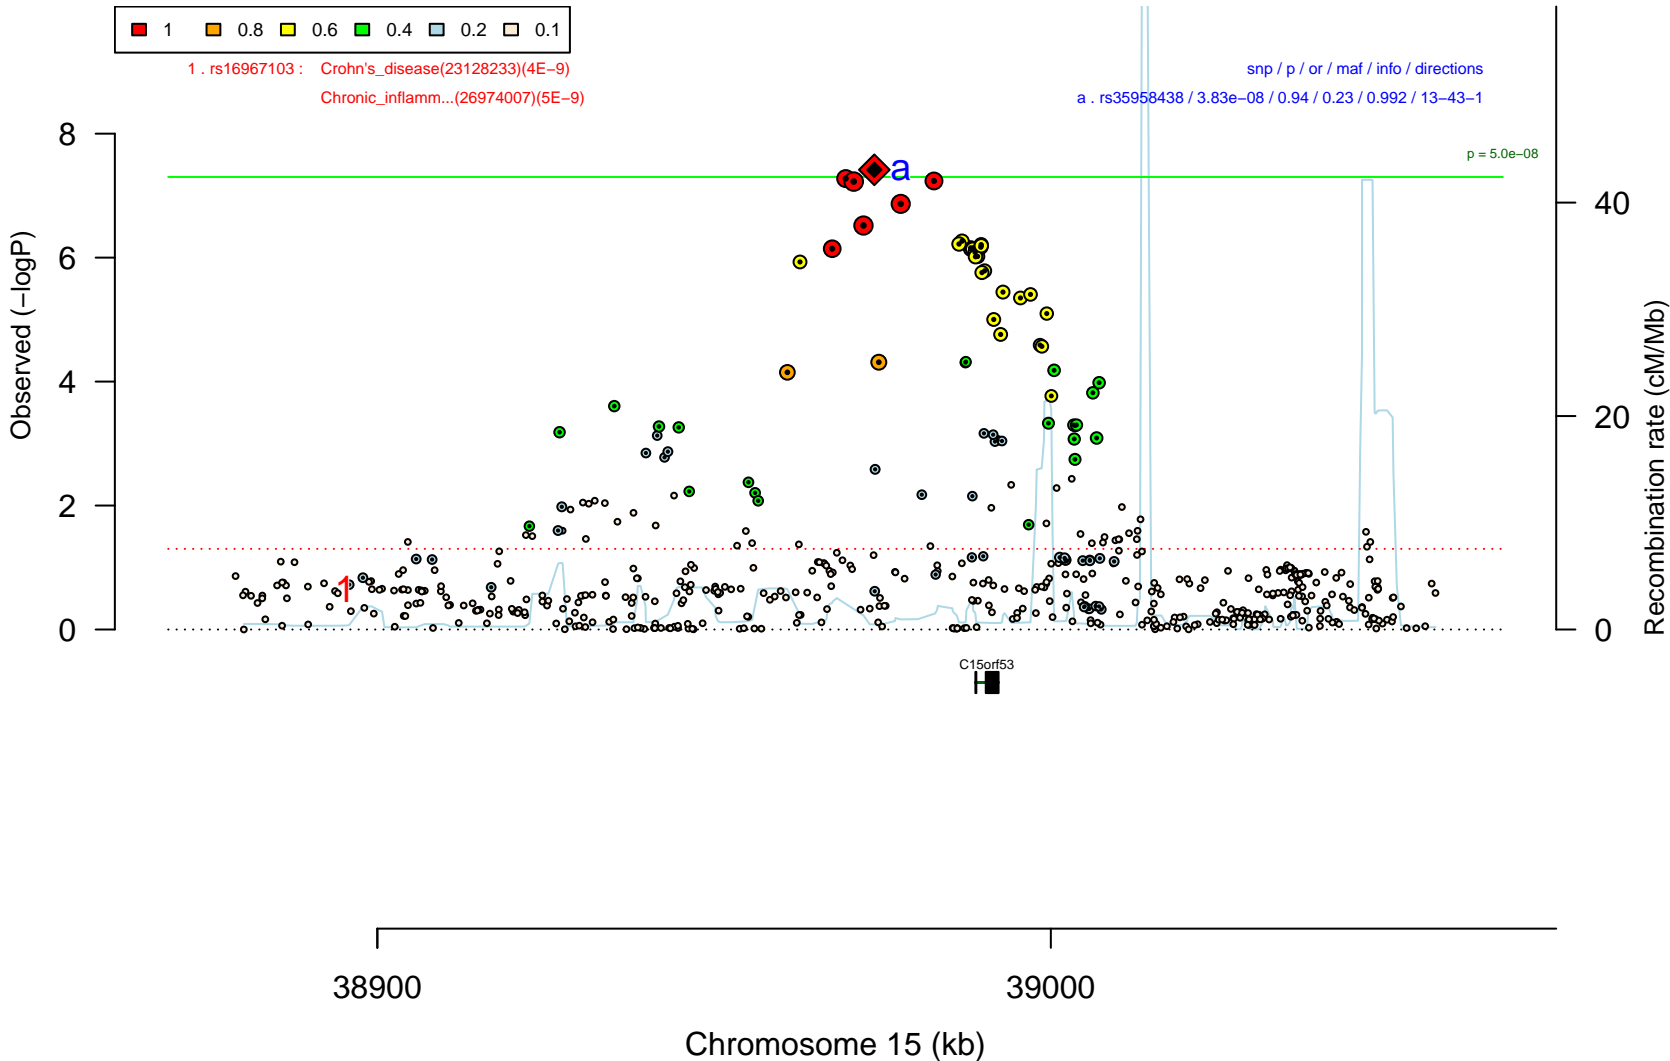

# bip\_pgc3.32.chr10

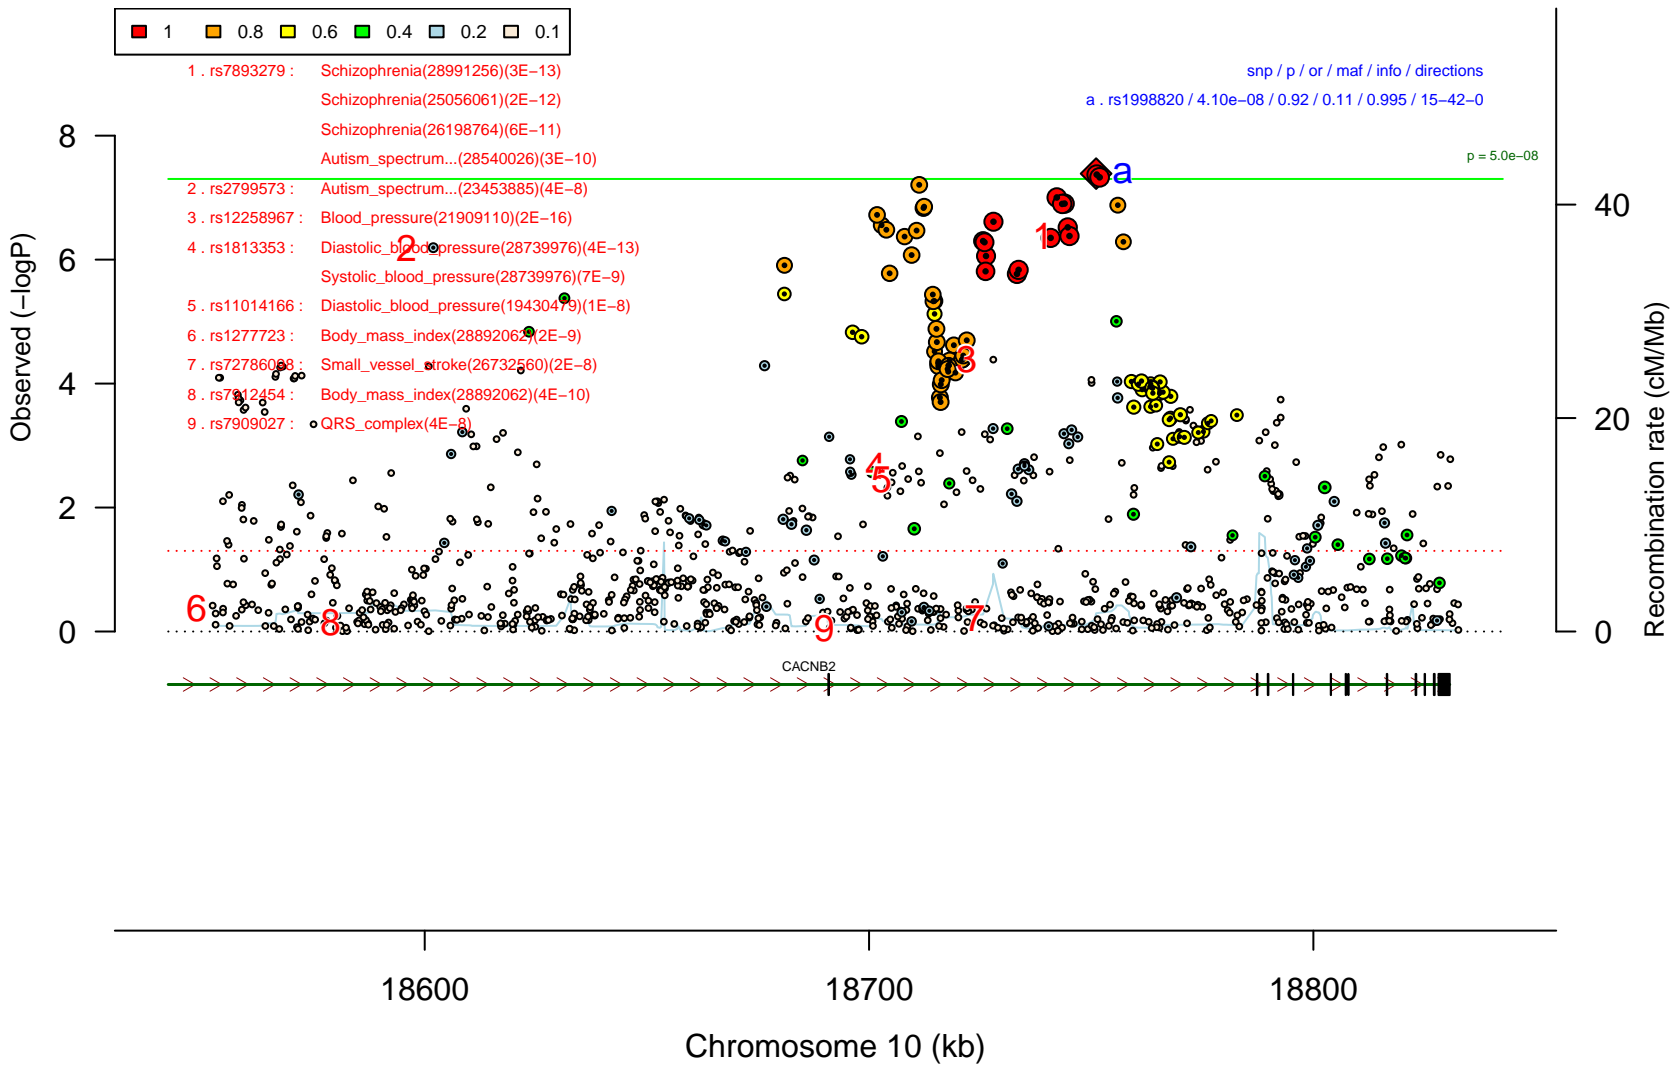



# bip\_pgc3.5.chr2

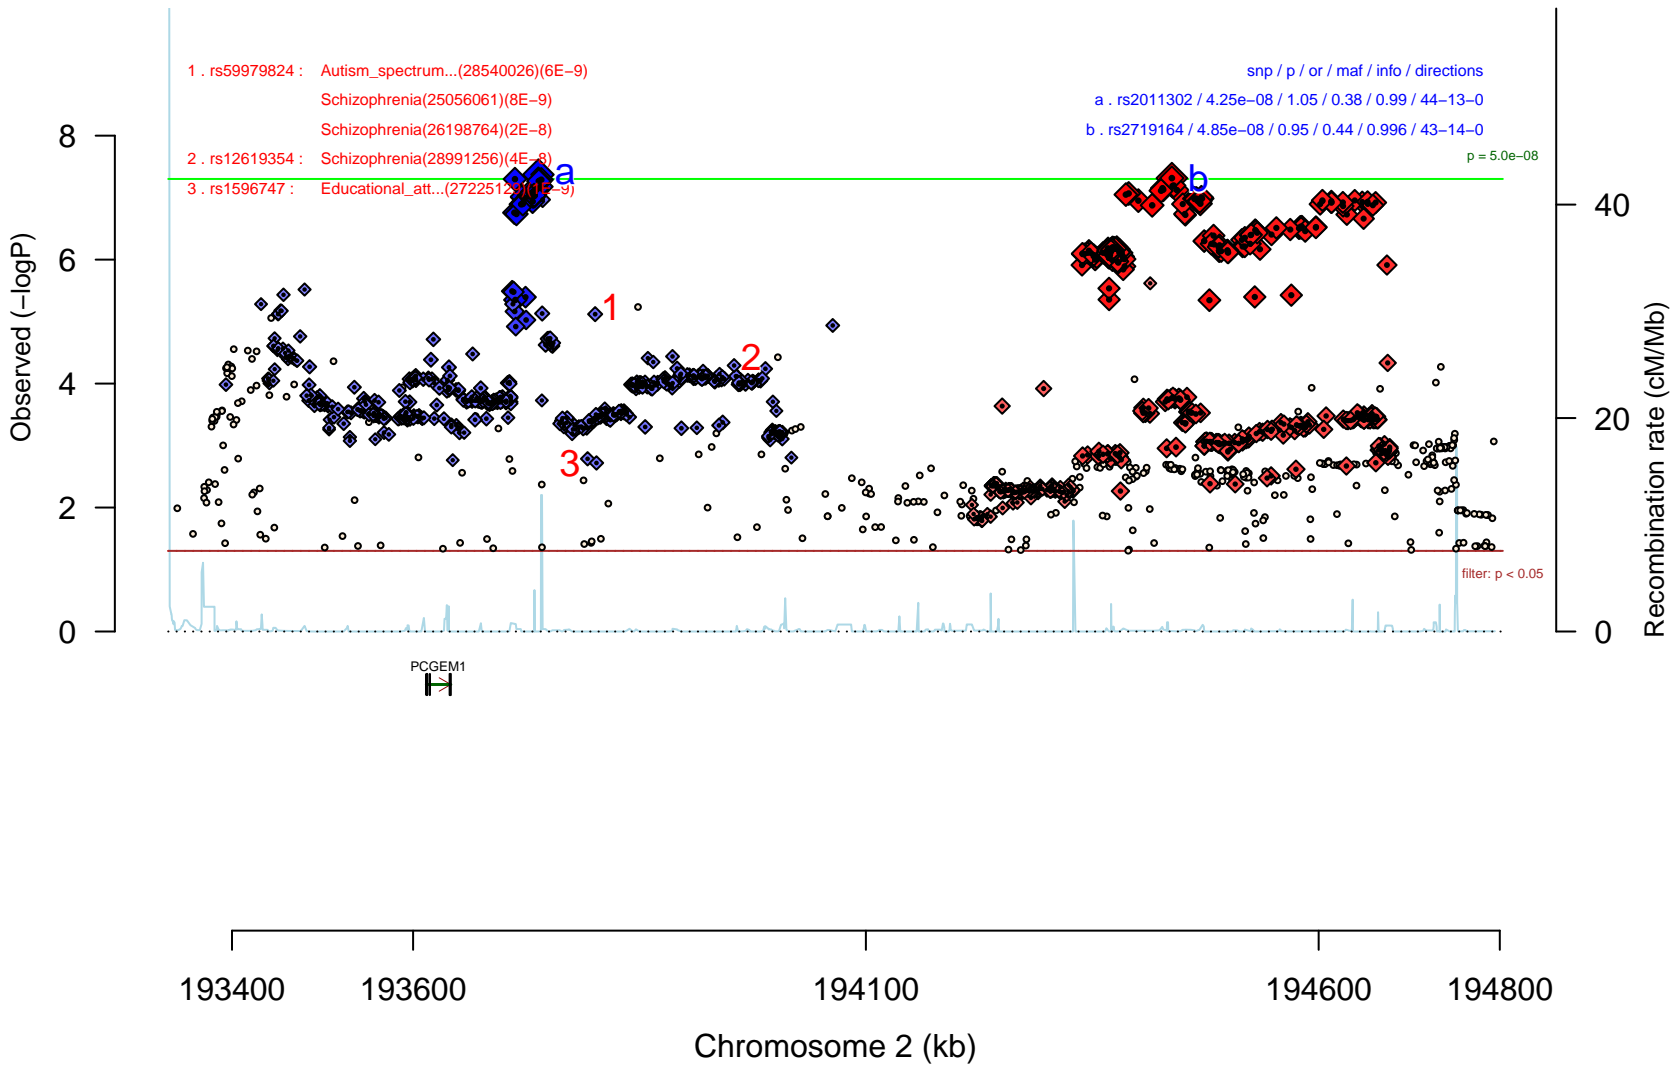

# bip\_pgc3.9.chr3

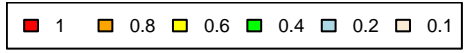

snp / p / or / maf / info / directions  
a . rs696366 / 4.46e-08 / 0.95 / 0.45 / 0.986 / 11-46-0

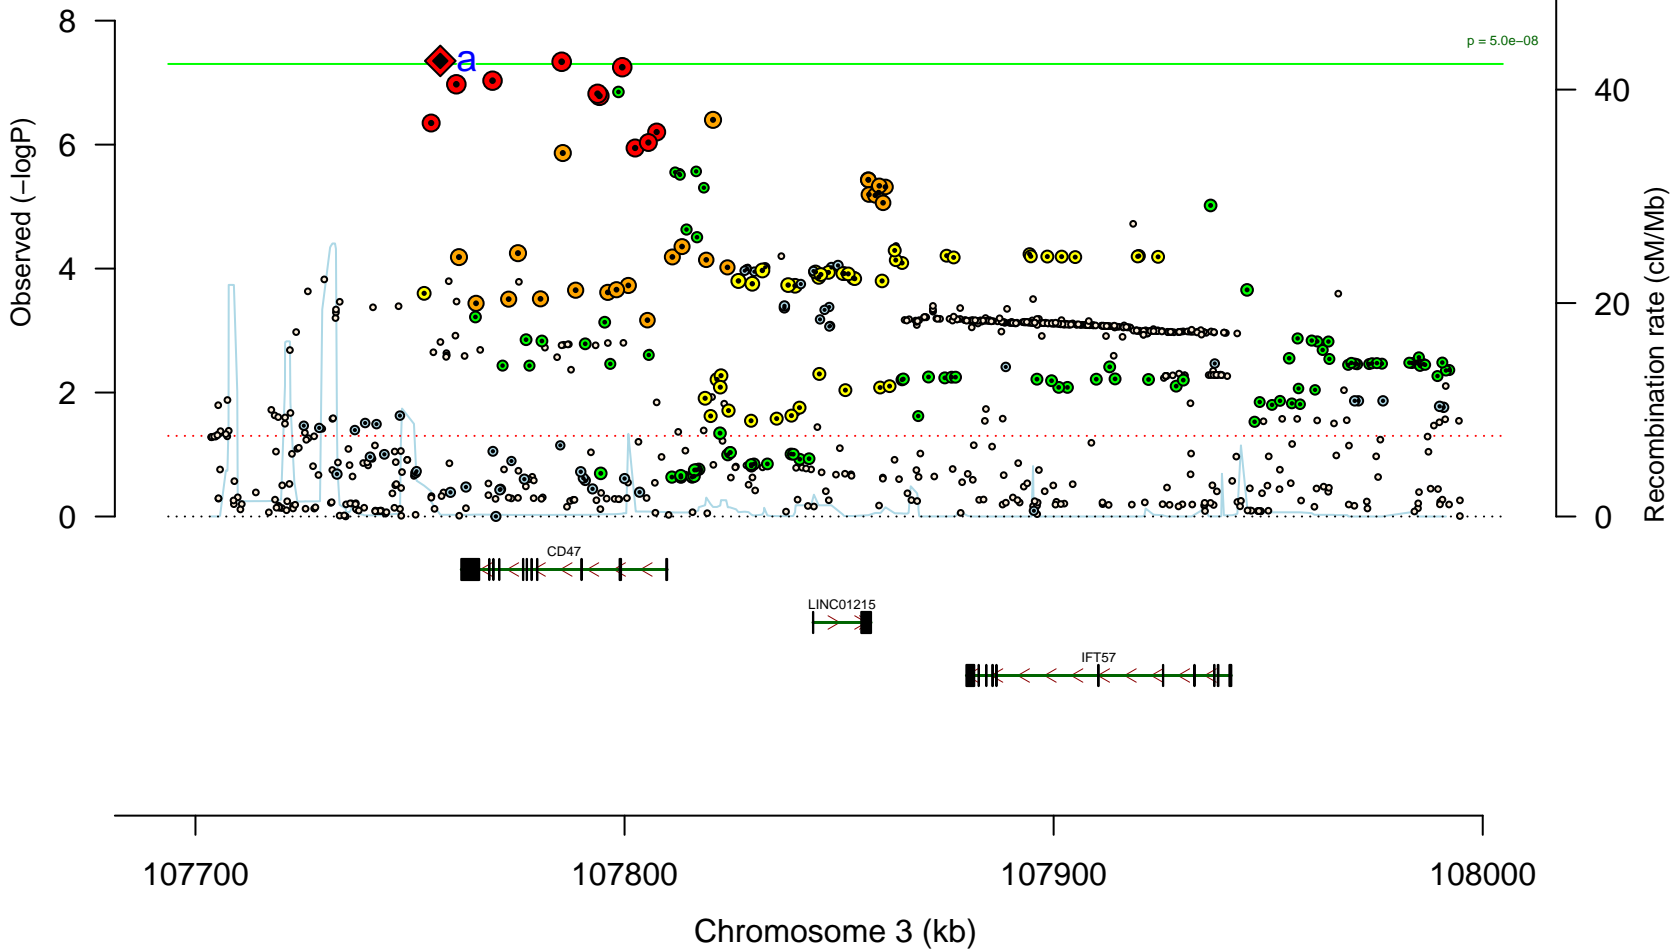

# bip\_pgc3.34.chr10

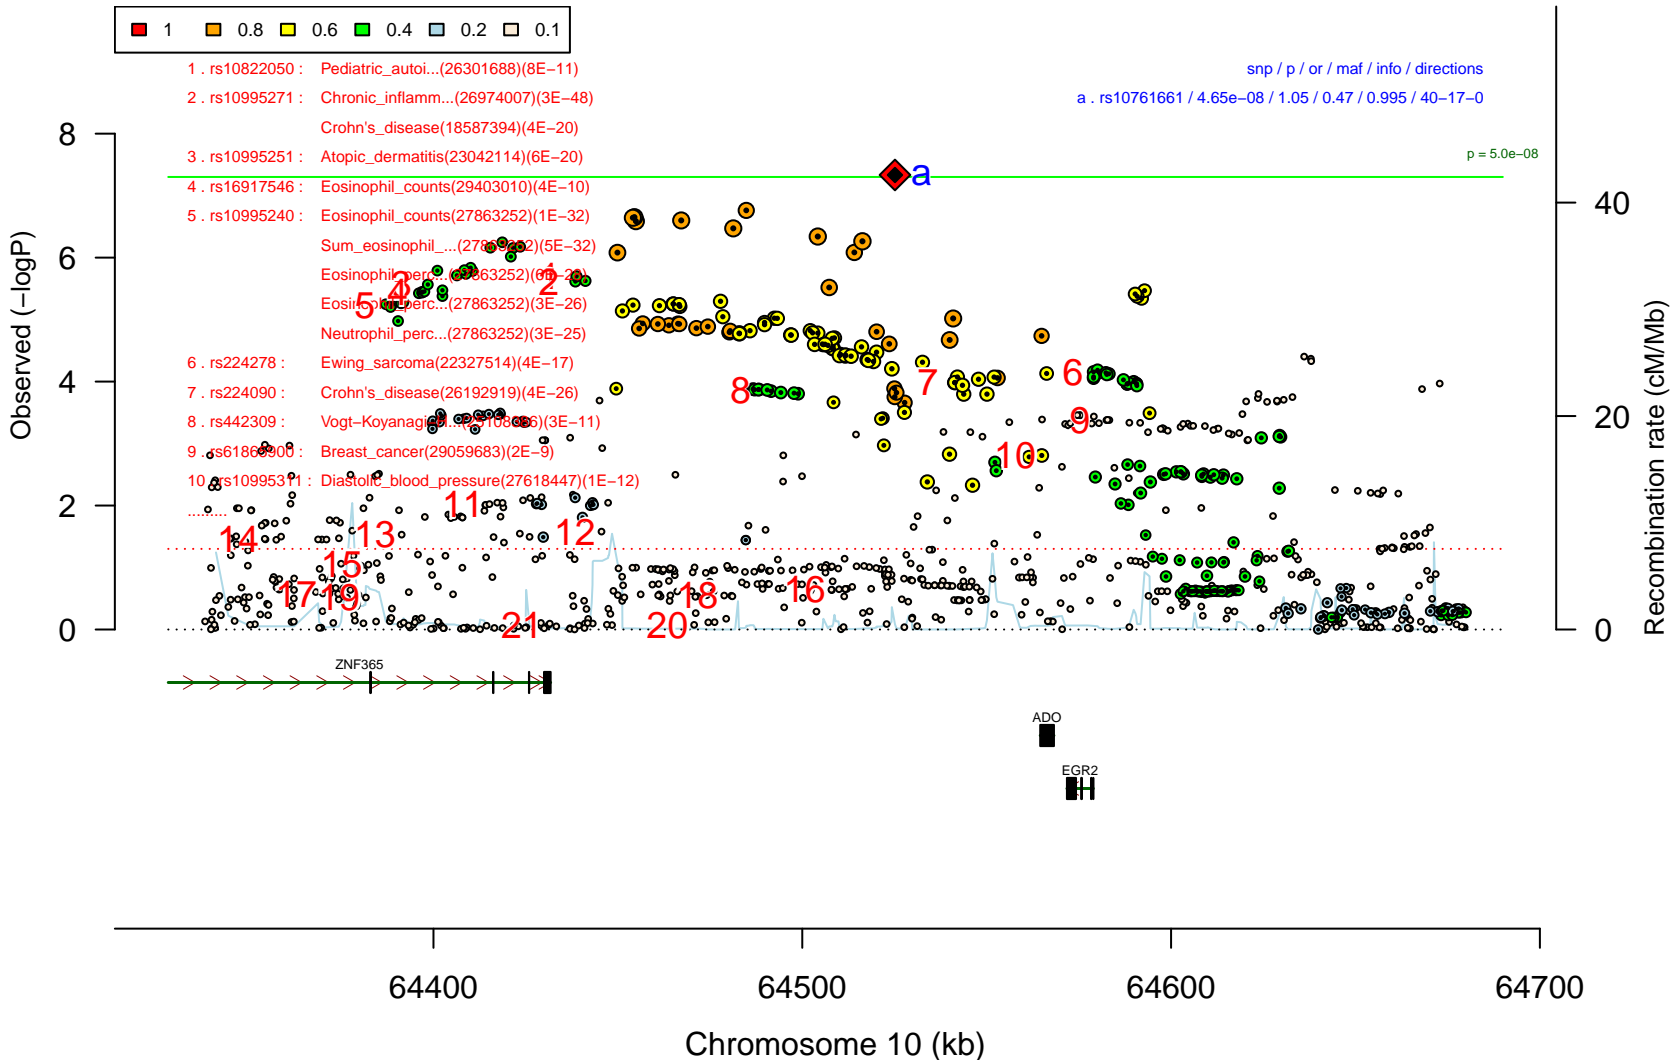

Supplement: NIHMS1687813-supplement-Supplementary_Data_1.pdf [file NIHMS1687813-supplement-Supplementary_Data_1.pdf]
